# Supplementary material for: The Subordinate Role of Pseudogenization over Recombinative Deletion Following Polyploidization in Angiosperms
Source: Research Square preprint supplement (doi:10.21203/rs.3.rs-4427674/v1), 2024-06-03
Supplement: Supplementary file 1 [file d52faed134d0540dbe0760ff.xlsx]

## Sheet: One sub-genome
ID	Description	GeneRatio	BgRatio	pvalue	p.adjust	qvalue
Gene retention in one sub-genome
GO:0004523	RNA-DNA hybrid ribonuclease activity	38/4621	87/63668	8.38906e-21	2.73987e-17	2.74e-17
GO:0016891	endoribonuclease activity, producing 5'-phosphomonoesters	50/4621	158/63668	1.49085e-19	2.43455e-16	2.43455e-16
GO:0016893	endonuclease activity, active with either ribo- or deoxyribonucleic acids and producing 5'-phosphomonoesters	50/4621	172/63668	8.30335e-18	9.03958e-15	9.03958e-15
GO:0004521	endoribonuclease activity	56/4621	223/63668	1.38762e-16	1.13299e-13	1.13299e-13
GO:0032196	transposition	27/4621	59/63668	7.85047e-16	5.12792e-13	5.12792e-13
GO:0004519	endonuclease activity	66/4621	315/63668	4.84901e-15	2.63948e-12	2.63948e-12
GO:0004540	ribonuclease activity	69/4621	359/63668	1.02786e-13	4.79569e-11	4.79569e-11
GO:0015074	DNA integration	47/4621	281/63668	7.50739e-08	3.06489e-05	3.06489e-05
GO:0034062	5'-3' RNA polymerase activity	31/4621	181/63668	6.97008e-06	0.00227643	0.00227643
GO:0097747	RNA polymerase activity	31/4621	181/63668	6.97008e-06	0.00227643	0.00227643
GO:0070615	nucleosome-dependent ATPase activity	24/4621	125/63668	1.02871e-05	0.00305435	0.00305435
GO:0030598	rRNA N-glycosylase activity	8/4621	18/63668	1.72645e-05	0.00469883	0.00469883
GO:0016779	nucleotidyltransferase activity	58/4621	462/63668	3.59153e-05	0.00844287	0.00844287
GO:0003899	DNA-directed 5'-3' RNA polymerase activity	27/4621	161/63668	3.86574e-05	0.00844287	0.00844287
GO:0032491	detection of molecule of fungal origin	9/4621	25/63668	3.87762e-05	0.00844287	0.00844287
GO:0140102	catalytic activity, acting on a rRNA	11/4621	38/63668	5.55599e-05	0.0113412	0.0113412
GO:0000145	exocyst	25/4621	155/63668	0.000139463	0.0259275	0.0259275
GO:0009595	detection of biotic stimulus	11/4621	42/63668	0.000150833	0.0259275	0.0259275
GO:0098581	detection of external biotic stimulus	11/4621	42/63668	0.000150833	0.0259275	0.0259275
GO:0008234	cysteine-type peptidase activity	52/4621	427/63668	0.000188716	0.0290263	0.0290263
GO:0000285	1-phosphatidylinositol-3-phosphate 5-kinase activity	9/4621	30/63668	0.000194761	0.0290263	0.0290263
GO:0030597	RNA glycosylase activity	8/4621	24/63668	0.000195523	0.0290263	0.0290263
GO:0010333	terpene synthase activity	20/4621	115/63668	0.000224012	0.0318098	0.0318098
GO:0002161	aminoacyl-tRNA editing activity	11/4621	45/63668	0.000292186	0.0397617	0.0397617
GO:0004822	isoleucine-tRNA ligase activity	5/4621	10/63668	0.000371349	0.048513	0.048513

## Sheet: Two sub-genomes
ID	Description	GeneRatio	BgRatio	pvalue	p.adjust	qvalue
Gene retention in two sub-genomes
GO:0009451	RNA modification	137/11063	413/63668	5.16455e-15	2.15104e-11	1.91741e-11
GO:0031935	regulation of chromatin silencing	28/11063	48/63668	2.2009e-10	3.95687e-07	3.5271e-07
GO:0035510	DNA dealkylation	27/11063	46/63668	3.80011e-10	3.95687e-07	3.5271e-07
GO:0080111	DNA demethylation	27/11063	46/63668	3.80011e-10	3.95687e-07	3.5271e-07
GO:0031936	negative regulation of chromatin silencing	14/11063	16/63668	1.91471e-09	1.59496e-06	1.42173e-06
GO:0000959	mitochondrial RNA metabolic process	35/11063	81/63668	5.20809e-08	3.61529e-05	3.22262e-05
GO:0140101	catalytic activity, acting on a tRNA	97/11063	335/63668	1.10614e-07	6.31591e-05	5.62993e-05
GO:0032981	mitochondrial respiratory chain complex I assembly	16/11063	24/63668	1.21314e-07	6.31591e-05	5.62993e-05
GO:0060968	regulation of gene silencing	47/11063	131/63668	3.09491e-07	0.000143225	0.000127669
GO:0000123	histone acetyltransferase complex	33/11063	81/63668	6.47536e-07	0.000252096	0.000224715
GO:0031248	protein acetyltransferase complex	37/11063	96/63668	7.26326e-07	0.000252096	0.000224715
GO:1902493	acetyltransferase complex	37/11063	96/63668	7.26326e-07	0.000252096	0.000224715
GO:0000049	tRNA binding	28/11063	65/63668	1.17771e-06	0.00037732	0.000336339
GO:0006399	tRNA metabolic process	117/11063	444/63668	1.36908e-06	0.0004073	0.000363062
GO:0006400	tRNA modification	52/11063	158/63668	1.62058e-06	0.00044998	0.000401107
GO:1902275	regulation of chromatin organization	54/11063	167/63668	1.90752e-06	0.000496551	0.00044262
GO:0010507	negative regulation of autophagy	15/11063	25/63668	2.19769e-06	0.000538434	0.000479954
GO:0007005	mitochondrion organization	75/11063	258/63668	2.40495e-06	0.000556479	0.000496039
GO:1900865	chloroplast RNA modification	18/11063	34/63668	2.60218e-06	0.000570425	0.00050847
GO:0048573	photoperiodism, flowering	118/11063	456/63668	3.21111e-06	0.000668713	0.000596083
GO:0070988	demethylation	36/11063	98/63668	3.80285e-06	0.000685483	0.000611031
GO:0045815	positive regulation of gene expression, epigenetic	14/11063	23/63668	3.80673e-06	0.000685483	0.000611031
GO:0016556	mRNA modification	29/11063	72/63668	3.97101e-06	0.000685483	0.000611031
GO:0051084	'de novo' posttranslational protein folding	10/11063	13/63668	4.27541e-06	0.000685483	0.000611031
GO:0051085	chaperone cofactor-dependent protein refolding	10/11063	13/63668	4.27541e-06	0.000685483	0.000611031
GO:0010506	regulation of autophagy	25/11063	58/63668	4.27913e-06	0.000685483	0.000611031
GO:0000170	sphingosine hydroxylase activity	9/11063	11/63668	5.64036e-06	0.000870077	0.000775576
GO:0051020	GTPase binding	32/11063	85/63668	7.0948e-06	0.0010234	0.000912243
GO:0010257	NADH dehydrogenase complex assembly	22/11063	49/63668	7.12569e-06	0.0010234	0.000912243
GO:0097428	protein maturation by iron-sulfur cluster transfer	11/11063	16/63668	7.99213e-06	0.00110957	0.000989061
GO:0003713	transcription coactivator activity	21/11063	46/63668	8.31285e-06	0.00111687	0.000995566
GO:2001020	regulation of response to DNA damage stimulus	23/11063	53/63668	8.93926e-06	0.0011635	0.00103713
GO:0060969	negative regulation of gene silencing	20/11063	43/63668	9.59452e-06	0.00121094	0.00107942
GO:0018342	protein prenylation	12/11063	19/63668	1.12378e-05	0.0013373	0.00119205
GO:0097354	prenylation	12/11063	19/63668	1.12378e-05	0.0013373	0.00119205
GO:0051014	actin filament severing	11/11063	17/63668	1.90653e-05	0.00220575	0.00196618
GO:0006282	regulation of DNA repair	20/11063	45/63668	2.21722e-05	0.00247652	0.00220754
GO:0006458	'de novo' protein folding	12/11063	20/63668	2.36303e-05	0.00247652	0.00220754
GO:0051647	nucleus localization	12/11063	20/63668	2.36303e-05	0.00247652	0.00220754
GO:0009895	negative regulation of catabolic process	25/11063	63/63668	2.43787e-05	0.00247652	0.00220754
GO:0031330	negative regulation of cellular catabolic process	25/11063	63/63668	2.43787e-05	0.00247652	0.00220754
GO:0033108	mitochondrial respiratory chain complex assembly	18/11063	39/63668	3.0328e-05	0.0030013	0.00267533
GO:0018344	protein geranylgeranylation	10/11063	15/63668	3.19052e-05	0.0030013	0.00267533
GO:1905897	regulation of response to endoplasmic reticulum stress	10/11063	15/63668	3.19052e-05	0.0030013	0.00267533
GO:0008641	ubiquitin-like modifier activating enzyme activity	22/11063	53/63668	3.24271e-05	0.0030013	0.00267533
GO:0034976	response to endoplasmic reticulum stress	57/11063	196/63668	3.5687e-05	0.00323122	0.00288027
GO:0022603	regulation of anatomical structure morphogenesis	100/11063	394/63668	3.92994e-05	0.0034826	0.00310435
GO:0033588	elongator holoenzyme complex	12/11063	21/63668	4.63877e-05	0.00395173	0.00352252
GO:0007033	vacuole organization	42/11063	133/63668	4.64909e-05	0.00395173	0.00352252
GO:0006914	autophagy	45/11063	146/63668	4.94925e-05	0.00404189	0.00360289
GO:0061919	process utilizing autophagic mechanism	45/11063	146/63668	4.94925e-05	0.00404189	0.00360289
GO:0006777	Mo-molybdopterin cofactor biosynthetic process	9/11063	13/63668	5.22889e-05	0.00418814	0.00373326
GO:0031267	small GTPase binding	28/11063	77/63668	5.36987e-05	0.00421991	0.00376158
GO:1900864	mitochondrial RNA modification	21/11063	51/63668	5.61636e-05	0.00432403	0.00385438
GO:0098797	plasma membrane protein complex	34/11063	101/63668	5.71e-05	0.00432403	0.00385438
GO:0006665	sphingolipid metabolic process	42/11063	135/63668	6.82648e-05	0.00506579	0.00451558
GO:0009838	abscission	29/11063	82/63668	7.15515e-05	0.00506579	0.00451558
GO:0010135	ureide metabolic process	10/11063	16/63668	7.17603e-05	0.00506579	0.00451558
GO:0010136	ureide catabolic process	10/11063	16/63668	7.17603e-05	0.00506579	0.00451558
GO:0004623	phospholipase A2 activity	11/11063	19/63668	8.26068e-05	0.00539166	0.00480606
GO:0043605	cellular amide catabolic process	11/11063	19/63668	8.26068e-05	0.00539166	0.00480606
GO:0046520	sphingoid biosynthetic process	11/11063	19/63668	8.26068e-05	0.00539166	0.00480606
GO:0019441	tryptophan catabolic process to kynurenine	8/11063	11/63668	8.2849e-05	0.00539166	0.00480606
GO:0070189	kynurenine metabolic process	8/11063	11/63668	8.2849e-05	0.00539166	0.00480606
GO:0017056	structural constituent of nuclear pore	23/11063	60/63668	9.58166e-05	0.00613963	0.00547279
GO:0009648	photoperiodism	119/11063	495/63668	0.000100589	0.00634774	0.0056583
GO:0015909	long-chain fatty acid transport	9/11063	14/63668	0.000123705	0.00715601	0.00637878
GO:0019720	Mo-molybdopterin cofactor metabolic process	9/11063	14/63668	0.000123705	0.00715601	0.00637878
GO:0032309	icosanoid secretion	9/11063	14/63668	0.000123705	0.00715601	0.00637878
GO:0050482	arachidonic acid secretion	9/11063	14/63668	0.000123705	0.00715601	0.00637878
GO:0071715	icosanoid transport	9/11063	14/63668	0.000123705	0.00715601	0.00637878
GO:1903963	arachidonate transport	9/11063	14/63668	0.000123705	0.00715601	0.00637878
GO:0006643	membrane lipid metabolic process	90/11063	358/63668	0.000132003	0.0075314	0.0067134
GO:0006342	chromatin silencing	38/11063	122/63668	0.000143378	0.00795346	0.00708962
GO:0030261	chromosome condensation	16/11063	36/63668	0.000145254	0.00795346	0.00708962
GO:0005828	kinetochore microtubule	10/11063	17/63668	0.000147039	0.00795346	0.00708962
GO:0007097	nuclear migration	10/11063	17/63668	0.000147039	0.00795346	0.00708962
GO:0010628	positive regulation of gene expression	51/11063	179/63668	0.000156187	0.00833999	0.00743416
GO:0036503	ERAD pathway	23/11063	62/63668	0.00017113	0.00902225	0.00804233
GO:0046467	membrane lipid biosynthetic process	71/11063	271/63668	0.000174275	0.0090732	0.00808774
GO:0061077	chaperone-mediated protein folding	24/11063	66/63668	0.000178425	0.00917457	0.0081781
GO:0051983	regulation of chromosome segregation	20/11063	51/63668	0.000186844	0.0094903	0.00845954
GO:0000819	sister chromatid segregation	50/11063	176/63668	0.000194374	0.00975384	0.00869445
GO:0070461	SAGA-type complex	18/11063	44/63668	0.000207034	0.0101447	0.00904283
GO:1905268	negative regulation of chromatin organization	18/11063	44/63668	0.000207034	0.0101447	0.00904283
GO:0004809	tRNA (guanine-N2-)-methyltransferase activity	8/11063	12/63668	0.000210449	0.0101921	0.00908513
GO:0006304	DNA modification	54/11063	195/63668	0.000226618	0.0107862	0.0096147
GO:0006310	DNA recombination	98/11063	402/63668	0.000229663	0.0107862	0.0096147
GO:0031965	nuclear membrane	24/11063	67/63668	0.000232552	0.0107862	0.0096147
GO:0140097	catalytic activity, acting on DNA	99/11063	407/63668	0.000233075	0.0107862	0.0096147
GO:0000256	allantoin catabolic process	9/11063	15/63668	0.000261405	0.0115825	0.0103245
GO:0043545	molybdopterin cofactor metabolic process	9/11063	15/63668	0.000261405	0.0115825	0.0103245
GO:0051189	prosthetic group metabolic process	9/11063	15/63668	0.000261405	0.0115825	0.0103245
GO:0080026	response to indolebutyric acid	9/11063	15/63668	0.000261405	0.0115825	0.0103245
GO:0006145	purine nucleobase catabolic process	11/11063	21/63668	0.000273821	0.0116374	0.0103734
GO:0007076	mitotic chromosome condensation	11/11063	21/63668	0.000273821	0.0116374	0.0103734
GO:0009569	chloroplast starch grain	11/11063	21/63668	0.000273821	0.0116374	0.0103734
GO:0030897	HOPS complex	11/11063	21/63668	0.000273821	0.0116374	0.0103734
GO:0031011	Ino80 complex	18/11063	45/63668	0.000289331	0.0120506	0.0107418
GO:0033202	DNA helicase complex	18/11063	45/63668	0.000289331	0.0120506	0.0107418
GO:0048506	regulation of timing of meristematic phase transition	46/11063	161/63668	0.000296713	0.0121158	0.0107999
GO:0048510	regulation of timing of transition from vegetative to reproductive phase	46/11063	161/63668	0.000296713	0.0121158	0.0107999
GO:0044728	DNA methylation or demethylation	52/11063	188/63668	0.000301519	0.0121925	0.0108682
GO:0000963	mitochondrial RNA processing	14/11063	31/63668	0.000306062	0.0122572	0.0109259
GO:0009773	photosynthetic electron transport in photosystem I	19/11063	49/63668	0.000318624	0.0126387	0.011266
GO:0048574	long-day photoperiodism, flowering	51/11063	184/63668	0.000324278	0.0127417	0.0113578
GO:0005968	Rab-protein geranylgeranyltransferase complex	7/11063	10/63668	0.000350007	0.0136241	0.0121444
GO:0042753	positive regulation of circadian rhythm	13/11063	28/63668	0.00035853	0.0137538	0.01226
GO:0004812	aminoacyl-tRNA ligase activity	60/11063	226/63668	0.000363246	0.0137538	0.01226
GO:0016875	ligase activity, forming carbon-oxygen bonds	60/11063	226/63668	0.000363246	0.0137538	0.01226
GO:0006302	double-strand break repair	63/11063	240/63668	0.00036718	0.0137775	0.0122811
GO:0001522	pseudouridine synthesis	27/11063	81/63668	0.000378605	0.0140794	0.0125502
GO:1901988	negative regulation of cell cycle phase transition	26/11063	77/63668	0.000383734	0.0141438	0.0126076
GO:0010364	regulation of ethylene biosynthetic process	18/11063	46/63668	0.000398632	0.0141906	0.0126494
GO:0031335	regulation of sulfur amino acid metabolic process	18/11063	46/63668	0.000398632	0.0141906	0.0126494
GO:1900908	regulation of olefin metabolic process	18/11063	46/63668	0.000398632	0.0141906	0.0126494
GO:1900911	regulation of olefin biosynthetic process	18/11063	46/63668	0.000398632	0.0141906	0.0126494
GO:0043200	response to amino acid	12/11063	25/63668	0.000412248	0.014551	0.0129705
GO:0000724	double-strand break repair via homologous recombination	45/11063	159/63668	0.000430025	0.0150509	0.0134162
GO:0006662	glycerol ether metabolic process	11/11063	22/63668	0.000461761	0.0158238	0.0141051
GO:0072718	response to cisplatin	8/11063	13/63668	0.000463506	0.0158238	0.0141051
GO:1904292	regulation of ERAD pathway	8/11063	13/63668	0.000463506	0.0158238	0.0141051
GO:0008033	tRNA processing	58/11063	219/63668	0.000480493	0.0160052	0.0142668
GO:0009982	pseudouridine synthase activity	23/11063	66/63668	0.000490252	0.0160052	0.0142668
GO:0000002	mitochondrial genome maintenance	10/11063	19/63668	0.000497695	0.0160052	0.0142668
GO:0010031	circumnutation	10/11063	19/63668	0.000497695	0.0160052	0.0142668
GO:0050879	multicellular organismal movement	10/11063	19/63668	0.000497695	0.0160052	0.0142668
GO:0051055	negative regulation of lipid biosynthetic process	10/11063	19/63668	0.000497695	0.0160052	0.0142668
GO:1903008	organelle disassembly	10/11063	19/63668	0.000497695	0.0160052	0.0142668
GO:0033218	amide binding	47/11063	169/63668	0.000499561	0.0160052	0.0142668
GO:0048509	regulation of meristem development	61/11063	234/63668	0.000545567	0.0173457	0.0154617
GO:0000070	mitotic sister chromatid segregation	36/11063	121/63668	0.000561314	0.0177111	0.0157875
GO:0000725	recombinational repair	45/11063	161/63668	0.000577181	0.0180749	0.0161117
GO:0051052	regulation of DNA metabolic process	46/11063	166/63668	0.000619356	0.019147	0.0170674
GO:0002097	tRNA wobble base modification	16/11063	40/63668	0.000620609	0.019147	0.0170674
GO:1901987	regulation of cell cycle phase transition	34/11063	113/63668	0.000629615	0.0192819	0.0171877
GO:0042127	regulation of cell population proliferation	54/11063	203/63668	0.000656293	0.0199523	0.0177852
GO:0006298	mismatch repair	17/11063	44/63668	0.000681056	0.0205551	0.0183225
GO:0000075	cell cycle checkpoint signaling	24/11063	72/63668	0.000779629	0.0233608	0.0208236
GO:0022604	regulation of cell morphogenesis	64/11063	252/63668	0.000848447	0.0252413	0.0224998
GO:0006611	protein export from nucleus	9/11063	17/63668	0.000908206	0.0265776	0.023691
GO:0080024	indolebutyric acid metabolic process	9/11063	17/63668	0.000908206	0.0265776	0.023691
GO:0004020	adenylylsulfate kinase activity	8/11063	14/63668	0.000916574	0.0265776	0.023691
GO:0008175	tRNA methyltransferase activity	17/11063	45/63668	0.000918889	0.0265776	0.023691
GO:0018904	ether metabolic process	14/11063	34/63668	0.000955566	0.0271503	0.0242015
GO:0051338	regulation of transferase activity	42/11063	151/63668	0.00095715	0.0271503	0.0242015
GO:0051053	negative regulation of DNA metabolic process	18/11063	49/63668	0.000964765	0.0271503	0.0242015
GO:0097346	INO80-type complex	18/11063	49/63668	0.000964765	0.0271503	0.0242015
GO:0016423	tRNA (guanine) methyltransferase activity	12/11063	27/63668	0.000978336	0.0271651	0.0242147
GO:0035514	DNA demethylase activity	12/11063	27/63668	0.000978336	0.0271651	0.0242147
GO:0010227	floral organ abscission	19/11063	53/63668	0.000994465	0.0274301	0.0244509
GO:0004197	cysteine-type endopeptidase activity	21/11063	61/63668	0.00101382	0.0277799	0.0247626
GO:1900618	regulation of shoot system morphogenesis	15/11063	38/63668	0.00107145	0.028978	0.0258306
GO:1901371	regulation of leaf morphogenesis	15/11063	38/63668	0.00107145	0.028978	0.0258306
GO:0010449	root meristem growth	30/11063	99/63668	0.00112048	0.0301083	0.0268382
GO:0040034	regulation of development, heterochronic	50/11063	189/63668	0.00115327	0.0302986	0.0270078
GO:0140053	mitochondrial gene expression	16/11063	42/63668	0.00116024	0.0302986	0.0270078
GO:0004571	mannosyl-oligosaccharide 1,2-alpha-mannosidase activity	11/11063	24/63668	0.00116276	0.0302986	0.0270078
GO:0015924	mannosyl-oligosaccharide mannosidase activity	11/11063	24/63668	0.00116276	0.0302986	0.0270078
GO:0070603	SWI/SNF superfamily-type complex	25/11063	78/63668	0.00116555	0.0302986	0.0270078
GO:0000165	MAPK cascade	13/11063	31/63668	0.00117808	0.0302986	0.0270078
GO:0008237	metallopeptidase activity	69/11063	279/63668	0.00117848	0.0302986	0.0270078
GO:0080156	mitochondrial mRNA modification	17/11063	46/63668	0.00122387	0.0312724	0.0278759
GO:0051129	negative regulation of cellular component organization	42/11063	153/63668	0.00126893	0.0321471	0.0286555
GO:0000375	RNA splicing, via transesterification reactions	94/11063	402/63668	0.00128125	0.0321471	0.0286555
GO:0000377	RNA splicing, via transesterification reactions with bulged adenosine as nucleophile	94/11063	402/63668	0.00128125	0.0321471	0.0286555
GO:0015908	fatty acid transport	14/11063	35/63668	0.00134001	0.0332231	0.0296147
GO:0005905	clathrin-coated pit	10/11063	21/63668	0.00135605	0.0332231	0.0296147
GO:0009263	deoxyribonucleotide biosynthetic process	10/11063	21/63668	0.00135605	0.0332231	0.0296147
GO:0030132	clathrin coat of coated pit	10/11063	21/63668	0.00135605	0.0332231	0.0296147
GO:0000380	alternative mRNA splicing, via spliceosome	12/11063	28/63668	0.00144319	0.0350431	0.031237
GO:0006188	IMP biosynthetic process	15/11063	39/63668	0.00146399	0.0350431	0.031237
GO:0042026	protein refolding	15/11063	39/63668	0.00146399	0.0350431	0.031237
GO:0046040	IMP metabolic process	15/11063	39/63668	0.00146399	0.0350431	0.031237
GO:0101031	chaperone complex	9/11063	18/63668	0.00153718	0.036585	0.0326114
GO:0007059	chromosome segregation	77/11063	321/63668	0.00160265	0.0371386	0.0331049
GO:0008146	sulfotransferase activity	19/11063	55/63668	0.00164976	0.0371386	0.0331049
GO:0033263	CORVET complex	8/11063	15/63668	0.00166534	0.0371386	0.0331049
GO:0001672	regulation of chromatin assembly or disassembly	7/11063	12/63668	0.00166745	0.0371386	0.0331049
GO:0010007	magnesium chelatase complex	7/11063	12/63668	0.00166745	0.0371386	0.0331049
GO:0010847	regulation of chromatin assembly	7/11063	12/63668	0.00166745	0.0371386	0.0331049
GO:0016851	magnesium chelatase activity	7/11063	12/63668	0.00166745	0.0371386	0.0331049
GO:0031445	regulation of heterochromatin assembly	7/11063	12/63668	0.00166745	0.0371386	0.0331049
GO:0031538	negative regulation of anthocyanin metabolic process	7/11063	12/63668	0.00166745	0.0371386	0.0331049
GO:0051002	ligase activity, forming nitrogen-metal bonds	7/11063	12/63668	0.00166745	0.0371386	0.0331049
GO:0051003	ligase activity, forming nitrogen-metal bonds, forming coordination complexes	7/11063	12/63668	0.00166745	0.0371386	0.0331049
GO:0120261	regulation of heterochromatin organization	7/11063	12/63668	0.00166745	0.0371386	0.0331049
GO:0043549	regulation of kinase activity	31/11063	106/63668	0.00176837	0.039177	0.0349219
GO:0009124	nucleoside monophosphate biosynthetic process	22/11063	68/63668	0.00195711	0.043129	0.0384447
GO:0006418	tRNA aminoacylation for protein translation	56/11063	222/63668	0.00201292	0.0436656	0.038923
GO:0043038	amino acid activation	56/11063	222/63668	0.00201292	0.0436656	0.038923
GO:0043039	tRNA aminoacylation	56/11063	222/63668	0.00201292	0.0436656	0.038923
GO:2000379	positive regulation of reactive oxygen species metabolic process	12/11063	29/63668	0.00207588	0.0439791	0.0392025
GO:0000398	mRNA splicing, via spliceosome	77/11063	324/63668	0.00209172	0.0439791	0.0392025
GO:0032029	myosin tail binding	19/11063	56/63668	0.00209531	0.0439791	0.0392025
GO:0032036	myosin heavy chain binding	19/11063	56/63668	0.00209531	0.0439791	0.0392025
GO:0080008	Cul4-RING E3 ubiquitin ligase complex	19/11063	56/63668	0.00209531	0.0439791	0.0392025
GO:0080115	myosin XI tail binding	19/11063	56/63668	0.00209531	0.0439791	0.0392025
GO:0000156	phosphorelay response regulator activity	10/11063	22/63668	0.00210128	0.0439791	0.0392025
GO:0048571	long-day photoperiodism	52/11063	204/63668	0.00223939	0.0466353	0.0415702
GO:0044770	cell cycle phase transition	38/11063	139/63668	0.002267	0.0469755	0.0418734
GO:0045814	negative regulation of gene expression, epigenetic	41/11063	153/63668	0.00234586	0.0483688	0.0431153

## Sheet: Three sub-genomes
ID	Description	GeneRatio	BgRatio	pvalue	p.adjust	qvalue
Gene retention in three sub-genomes
GO:0140013	meiotic nuclear division	132/16238	296/63668	7.95455e-13	3.46978e-09	2.72632e-09
GO:0045132	meiotic chromosome segregation	78/16238	153/63668	1.31965e-11	2.87815e-08	2.26146e-08
GO:0007127	meiosis I	87/16238	182/63668	7.55627e-11	9.22173e-08	7.24582e-08
GO:0071824	protein-DNA complex subunit organization	84/16238	174/63668	8.45643e-11	9.22173e-08	7.24582e-08
GO:0061982	meiosis I cell cycle process	90/16238	193/63668	1.8723e-10	1.57512e-07	1.23763e-07
GO:0000228	nuclear chromosome	78/16238	160/63668	2.16661e-10	1.57512e-07	1.23763e-07
GO:0010207	photosystem II assembly	43/16238	71/63668	4.59539e-10	2.77632e-07	2.18144e-07
GO:0065004	protein-DNA complex assembly	77/16238	160/63668	6.04576e-10	2.77632e-07	2.18144e-07
GO:0005313	L-glutamate transmembrane transporter activity	24/16238	30/63668	6.26688e-10	2.77632e-07	2.18144e-07
GO:0004376	glycolipid mannosyltransferase activity	19/16238	21/63668	6.36478e-10	2.77632e-07	2.18144e-07
GO:1903046	meiotic cell cycle process	151/16238	380/63668	7.66219e-10	3.03841e-07	2.38738e-07
GO:0051054	positive regulation of DNA metabolic process	26/16238	35/63668	2.07267e-09	7.53416e-07	5.91984e-07
GO:0070676	intralumenal vesicle formation	20/16238	24/63668	4.70486e-09	1.47022e-06	1.1552e-06
GO:0007032	endosome organization	27/16238	38/63668	5.11279e-09	1.47022e-06	1.1552e-06
GO:0015937	coenzyme A biosynthetic process	26/16238	36/63668	5.63905e-09	1.47022e-06	1.1552e-06
GO:0045143	homologous chromosome segregation	55/16238	106/63668	5.65727e-09	1.47022e-06	1.1552e-06
GO:0070192	chromosome organization involved in meiotic cell cycle	65/16238	133/63668	5.81321e-09	1.47022e-06	1.1552e-06
GO:0015172	acidic amino acid transmembrane transporter activity	24/16238	32/63668	6.3496e-09	1.47022e-06	1.1552e-06
GO:0000086	G2/M transition of mitotic cell cycle	23/16238	30/63668	6.40399e-09	1.47022e-06	1.1552e-06
GO:0010212	response to ionizing radiation	39/16238	67/63668	1.42525e-08	3.10846e-06	2.44242e-06
GO:0000781	chromosome, telomeric region	25/16238	35/63668	1.607e-08	3.33797e-06	2.62276e-06
GO:0010389	regulation of G2/M transition of mitotic cell cycle	20/16238	25/63668	1.78325e-08	3.46935e-06	2.72598e-06
GO:0007131	reciprocal meiotic recombination	66/16238	139/63668	1.90886e-08	3.46935e-06	2.72598e-06
GO:0140527	reciprocal homologous recombination	66/16238	139/63668	1.90886e-08	3.46935e-06	2.72598e-06
GO:0031969	chloroplast membrane	133/16238	340/63668	2.30904e-08	4.02882e-06	3.16558e-06
GO:1990204	oxidoreductase complex	123/16238	310/63668	2.95733e-08	4.96149e-06	3.89841e-06
GO:0051321	meiotic cell cycle	151/16238	399/63668	3.50121e-08	5.6564e-06	4.44442e-06
GO:0043157	response to cation stress	17/16238	20/63668	4.05747e-08	6.32097e-06	4.96659e-06
GO:0007129	homologous chromosome pairing at meiosis	47/16238	90/63668	5.44412e-08	7.89187e-06	6.20091e-06
GO:0019209	kinase activator activity	14/16238	15/63668	5.60862e-08	7.89187e-06	6.20091e-06
GO:0030295	protein kinase activator activity	14/16238	15/63668	5.60862e-08	7.89187e-06	6.20091e-06
GO:0000712	resolution of meiotic recombination intermediates	20/16238	26/63668	5.85924e-08	7.98688e-06	6.27555e-06
GO:0004459	L-lactate dehydrogenase activity	12/16238	12/63668	7.55128e-08	9.98142e-06	7.84273e-06
GO:0009553	embryo sac development	173/16238	475/63668	8.46635e-08	1.08618e-05	8.5345e-06
GO:0070008	serine-type exopeptidase activity	81/16238	187/63668	8.7888e-08	1.09534e-05	8.60641e-06
GO:0010279	indole-3-acetic acid amido synthetase activity	15/16238	17/63668	9.85424e-08	1.19401e-05	9.38169e-06
GO:2000573	positive regulation of DNA biosynthetic process	16/16238	19/63668	1.35781e-07	1.60074e-05	1.25776e-05
GO:0031570	DNA integrity checkpoint signaling	22/16238	31/63668	1.4346e-07	1.64677e-05	1.29392e-05
GO:0006312	mitotic recombination	17/16238	21/63668	1.61901e-07	1.8108e-05	1.4228e-05
GO:0007143	female meiotic nuclear division	24/16238	36/63668	2.47773e-07	2.62858e-05	2.06537e-05
GO:0010638	positive regulation of organelle organization	92/16238	224/63668	2.48219e-07	2.62858e-05	2.06537e-05
GO:0006888	endoplasmic reticulum to Golgi vesicle-mediated transport	53/16238	110/63668	2.53096e-07	2.62858e-05	2.06537e-05
GO:0009513	etioplast	11/16238	11/63668	2.9623e-07	3.00501e-05	2.36114e-05
GO:0030674	protein-macromolecule adaptor activity	81/16238	192/63668	3.37729e-07	3.34812e-05	2.63073e-05
GO:0000794	condensed nuclear chromosome	31/16238	53/63668	3.67576e-07	3.56304e-05	2.7996e-05
GO:0016774	phosphotransferase activity, carboxyl group as acceptor	30/16238	51/63668	4.7693e-07	4.52254e-05	3.55351e-05
GO:0009423	chorismate biosynthetic process	16/16238	20/63668	5.16604e-07	4.63794e-05	3.64418e-05
GO:0010236	plastoquinone biosynthetic process	18/16238	24/63668	5.33176e-07	4.63794e-05	3.64418e-05
GO:0032780	negative regulation of ATPase activity	18/16238	24/63668	5.33176e-07	4.63794e-05	3.64418e-05
GO:0016328	lateral plasma membrane	17/16238	22/63668	5.41601e-07	4.63794e-05	3.64418e-05
GO:0060090	molecular adaptor activity	84/16238	203/63668	5.53757e-07	4.63794e-05	3.64418e-05
GO:0009706	chloroplast inner membrane	73/16238	170/63668	5.53845e-07	4.63794e-05	3.64418e-05
GO:0051258	protein polymerization	81/16238	194/63668	5.63528e-07	4.63794e-05	3.64418e-05
GO:0043574	peroxisomal transport	31/16238	54/63668	6.51864e-07	5.26561e-05	4.13736e-05
GO:0140534	endoplasmic reticulum protein-containing complex	59/16238	130/63668	7.21887e-07	5.72522e-05	4.49849e-05
GO:0035825	homologous recombination	66/16238	151/63668	8.81982e-07	6.87001e-05	5.398e-05
GO:0015807	L-amino acid transport	21/16238	31/63668	9.45532e-07	7.11105e-05	5.58739e-05
GO:1902475	L-alpha-amino acid transmembrane transport	21/16238	31/63668	9.45532e-07	7.11105e-05	5.58739e-05
GO:1901657	glycosyl compound metabolic process	163/16238	458/63668	1.01313e-06	7.47897e-05	5.87648e-05
GO:0006900	vesicle budding from membrane	27/16238	45/63668	1.02874e-06	7.47897e-05	5.87648e-05
GO:0010078	maintenance of root meristem identity	38/16238	73/63668	1.10166e-06	7.67995e-05	6.03439e-05
GO:0009295	nucleoid	65/16238	149/63668	1.1535e-06	7.67995e-05	6.03439e-05
GO:0015296	anion:cation symporter activity	10/16238	10/63668	1.16203e-06	7.67995e-05	6.03439e-05
GO:0032206	positive regulation of telomere maintenance	10/16238	10/63668	1.16203e-06	7.67995e-05	6.03439e-05
GO:0032212	positive regulation of telomere maintenance via telomerase	10/16238	10/63668	1.16203e-06	7.67995e-05	6.03439e-05
GO:1904358	positive regulation of telomere maintenance via telomere lengthening	10/16238	10/63668	1.16203e-06	7.67995e-05	6.03439e-05
GO:0004185	serine-type carboxypeptidase activity	74/16238	176/63668	1.23215e-06	7.90197e-05	6.20884e-05
GO:1901661	quinone metabolic process	42/16238	84/63668	1.24997e-06	7.90197e-05	6.20884e-05
GO:1901663	quinone biosynthetic process	42/16238	84/63668	1.24997e-06	7.90197e-05	6.20884e-05
GO:0043462	regulation of ATPase activity	18/16238	25/63668	1.44707e-06	9.0173e-05	7.08519e-05
GO:0012506	vesicle membrane	100/16238	257/63668	1.54884e-06	9.51554e-05	7.47667e-05
GO:0015813	L-glutamate transmembrane transport	16/16238	21/63668	1.65165e-06	9.8692e-05	7.75456e-05
GO:2000278	regulation of DNA biosynthetic process	16/16238	21/63668	1.65165e-06	9.8692e-05	7.75456e-05
GO:0016072	rRNA metabolic process	141/16238	389/63668	1.67976e-06	9.90152e-05	7.77995e-05
GO:0016592	mediator complex	54/16238	119/63668	2.09565e-06	0.000121883	9.57676e-05
GO:0048193	Golgi vesicle transport	117/16238	313/63668	2.2681e-06	0.000128768	0.000101177
GO:0072348	sulfur compound transport	37/16238	72/63668	2.27583e-06	0.000128768	0.000101177
GO:0007140	male meiotic nuclear division	50/16238	108/63668	2.40694e-06	0.000128768	0.000101177
GO:0006775	fat-soluble vitamin metabolic process	26/16238	44/63668	2.44627e-06	0.000128768	0.000101177
GO:0010189	vitamin E biosynthetic process	26/16238	44/63668	2.44627e-06	0.000128768	0.000101177
GO:0042360	vitamin E metabolic process	26/16238	44/63668	2.44627e-06	0.000128768	0.000101177
GO:0042362	fat-soluble vitamin biosynthetic process	26/16238	44/63668	2.44627e-06	0.000128768	0.000101177
GO:0030659	cytoplasmic vesicle membrane	90/16238	228/63668	2.4939e-06	0.000128768	0.000101177
GO:0051307	meiotic chromosome separation	20/16238	30/63668	2.53421e-06	0.000128768	0.000101177
GO:0004180	carboxypeptidase activity	76/16238	185/63668	2.57227e-06	0.000128768	0.000101177
GO:0006364	rRNA processing	134/16238	369/63668	2.6681e-06	0.000128768	0.000101177
GO:0004665	prephenate dehydrogenase (NADP+) activity	11/16238	12/63668	2.72411e-06	0.000128768	0.000101177
GO:0008977	prephenate dehydrogenase (NAD+) activity	11/16238	12/63668	2.72411e-06	0.000128768	0.000101177
GO:0015131	oxaloacetate transmembrane transporter activity	11/16238	12/63668	2.72411e-06	0.000128768	0.000101177
GO:0015729	oxaloacetate transport	11/16238	12/63668	2.72411e-06	0.000128768	0.000101177
GO:0033730	arogenate dehydrogenase (NADP+) activity	11/16238	12/63668	2.72411e-06	0.000128768	0.000101177
GO:0033731	arogenate dehydrogenase [NAD(P)+] activity	11/16238	12/63668	2.72411e-06	0.000128768	0.000101177
GO:0044839	cell cycle G2/M phase transition	23/16238	37/63668	2.7454e-06	0.000128768	0.000101177
GO:0015081	sodium ion transmembrane transporter activity	33/16238	62/63668	2.90573e-06	0.000134838	0.000105947
GO:0051130	positive regulation of cellular component organization	98/16238	254/63668	3.01452e-06	0.000137805	0.000108278
GO:1900425	negative regulation of defense response to bacterium	36/16238	70/63668	3.03285e-06	0.000137805	0.000108278
GO:0006541	glutamine metabolic process	25/16238	42/63668	3.16874e-06	0.000141041	0.000110821
GO:0040020	regulation of meiotic nuclear division	25/16238	42/63668	3.16874e-06	0.000141041	0.000110821
GO:0009067	aspartate family amino acid biosynthetic process	59/16238	135/63668	3.26425e-06	0.000143825	0.000113008
GO:0042646	plastid nucleoid	63/16238	147/63668	3.43277e-06	0.000149738	0.000117654
GO:0051336	regulation of hydrolase activity	55/16238	124/63668	4.00964e-06	0.000170272	0.000133788
GO:0004457	lactate dehydrogenase activity	12/16238	14/63668	4.02063e-06	0.000170272	0.000133788
GO:1902358	sulfate transmembrane transport	12/16238	14/63668	4.02063e-06	0.000170272	0.000133788
GO:0051052	regulation of DNA metabolic process	69/16238	166/63668	4.46405e-06	0.000186777	0.000146757
GO:0008483	transaminase activity	63/16238	148/63668	4.49601e-06	0.000186777	0.000146757
GO:0003849	3-deoxy-7-phosphoheptulonate synthase activity	13/16238	16/63668	4.80108e-06	0.000195723	0.000153786
GO:0072546	EMC complex	13/16238	16/63668	4.80108e-06	0.000195723	0.000153786
GO:0008821	crossover junction endodeoxyribonuclease activity	14/16238	18/63668	5.078e-06	0.000203213	0.000159671
GO:0016889	endodeoxyribonuclease activity, producing 3'-phosphomonoesters	14/16238	18/63668	5.078e-06	0.000203213	0.000159671
GO:0010223	secondary shoot formation	46/16238	99/63668	5.29311e-06	0.000208005	0.000163436
GO:0010346	shoot axis formation	46/16238	99/63668	5.29311e-06	0.000208005	0.000163436
GO:0070897	transcription preinitiation complex assembly	20/16238	31/63668	5.42271e-06	0.000211195	0.000165943
GO:0000725	recombinational repair	67/16238	161/63668	5.80356e-06	0.000224028	0.000176026
GO:0019684	photosynthesis, light reaction	135/16238	378/63668	6.59104e-06	0.000252194	0.000198157
GO:0004030	aldehyde dehydrogenase [NAD(P)+] activity	22/16238	36/63668	6.76506e-06	0.000256602	0.00020162
GO:0006625	protein targeting to peroxisome	28/16238	51/63668	7.37354e-06	0.000262322	0.000206115
GO:0072662	protein localization to peroxisome	28/16238	51/63668	7.37354e-06	0.000262322	0.000206115
GO:0072663	establishment of protein localization to peroxisome	28/16238	51/63668	7.37354e-06	0.000262322	0.000206115
GO:0009116	nucleoside metabolic process	57/16238	132/63668	7.40697e-06	0.000262322	0.000206115
GO:0009683	indoleacetic acid metabolic process	24/16238	41/63668	7.48184e-06	0.000262322	0.000206115
GO:0044766	multi-organism transport	24/16238	41/63668	7.48184e-06	0.000262322	0.000206115
GO:0046794	transport of virus	24/16238	41/63668	7.48184e-06	0.000262322	0.000206115
GO:1902579	multi-organism localization	24/16238	41/63668	7.48184e-06	0.000262322	0.000206115
GO:0002237	response to molecule of bacterial origin	66/16238	159/63668	7.50006e-06	0.000262322	0.000206115
GO:0006310	DNA recombination	142/16238	402/63668	7.51725e-06	0.000262322	0.000206115
GO:0042181	ketone biosynthetic process	42/16238	89/63668	8.2426e-06	0.000285351	0.00022421
GO:0009110	vitamin biosynthetic process	95/16238	250/63668	8.82096e-06	0.000302969	0.000238053
GO:0016653	oxidoreductase activity, acting on NAD(P)H, heme protein as acceptor	17/16238	25/63668	9.79649e-06	0.000326984	0.000256922
GO:0000813	ESCRT I complex	10/16238	11/63668	9.82001e-06	0.000326984	0.000256922
GO:0006791	sulfur utilization	10/16238	11/63668	9.82001e-06	0.000326984	0.000256922
GO:0006792	regulation of sulfur utilization	10/16238	11/63668	9.82001e-06	0.000326984	0.000256922
GO:0009612	response to mechanical stimulus	30/16238	57/63668	1.09097e-05	0.000360209	0.000283028
GO:1902749	regulation of cell cycle G2/M phase transition	20/16238	32/63668	1.0983e-05	0.000360209	0.000283028
GO:0015800	acidic amino acid transport	16/16238	23/63668	1.15439e-05	0.000375779	0.000295262
GO:0051495	positive regulation of cytoskeleton organization	44/16238	96/63668	1.29419e-05	0.000415092	0.000326151
GO:1902905	positive regulation of supramolecular fiber organization	44/16238	96/63668	1.29419e-05	0.000415092	0.000326151
GO:0000460	maturation of 5.8S rRNA	11/16238	13/63668	1.3578e-05	0.00042005	0.000330048
GO:0008893	guanosine-3',5'-bis(diphosphate) 3'-diphosphatase activity	11/16238	13/63668	1.3578e-05	0.00042005	0.000330048
GO:0015180	L-alanine transmembrane transporter activity	11/16238	13/63668	1.3578e-05	0.00042005	0.000330048
GO:0016794	diphosphoric monoester hydrolase activity	11/16238	13/63668	1.3578e-05	0.00042005	0.000330048
GO:0022858	alanine transmembrane transporter activity	11/16238	13/63668	1.3578e-05	0.00042005	0.000330048
GO:0030173	integral component of Golgi membrane	19/16238	30/63668	1.38677e-05	0.000423014	0.000332376
GO:0031228	intrinsic component of Golgi membrane	19/16238	30/63668	1.38677e-05	0.000423014	0.000332376
GO:0009559	embryo sac central cell differentiation	46/16238	102/63668	1.40408e-05	0.00042532	0.000334188
GO:0016894	endonuclease activity, active with either ribo- or deoxyribonucleic acids and producing 3'-phosphomonoesters	14/16238	19/63668	1.47327e-05	0.0004432	0.000348237
GO:0032204	regulation of telomere maintenance	12/16238	15/63668	1.53905e-05	0.000457967	0.00035984
GO:0001682	tRNA 5'-leader removal	13/16238	17/63668	1.55988e-05	0.000457967	0.00035984
GO:0099116	tRNA 5'-end processing	13/16238	17/63668	1.55988e-05	0.000457967	0.00035984
GO:0034728	nucleosome organization	50/16238	114/63668	1.56435e-05	0.000457967	0.00035984
GO:0000724	double-strand break repair via homologous recombination	65/16238	159/63668	1.5756e-05	0.000458184	0.00036001
GO:0016780	phosphotransferase activity, for other substituted phosphate groups	27/16238	50/63668	1.60842e-05	0.00046463	0.000365075
GO:0071265	L-methionine biosynthetic process	18/16238	28/63668	1.73721e-05	0.000498534	0.000391715
GO:0010431	seed maturation	90/16238	238/63668	1.85697e-05	0.00052942	0.000415983
GO:0008033	tRNA processing	84/16238	219/63668	1.88442e-05	0.000533756	0.000419389
GO:0006465	signal peptide processing	28/16238	53/63668	1.94013e-05	0.000545989	0.000429002
GO:0009528	plastid inner membrane	73/16238	185/63668	2.11794e-05	0.00059221	0.000465319
GO:0005747	mitochondrial respiratory chain complex I	53/16238	124/63668	2.14922e-05	0.000596092	0.000468369
GO:0003697	single-stranded DNA binding	54/16238	127/63668	2.15916e-05	0.000596092	0.000468369
GO:0000723	telomere maintenance	36/16238	75/63668	2.23176e-05	0.000608433	0.000478066
GO:0032200	telomere organization	36/16238	75/63668	2.23176e-05	0.000608433	0.000478066
GO:0043255	regulation of carbohydrate biosynthetic process	78/16238	201/63668	2.27487e-05	0.000616333	0.000484274
GO:0016769	transferase activity, transferring nitrogenous groups	63/16238	155/63668	2.60475e-05	0.000701353	0.000551076
GO:0006270	DNA replication initiation	30/16238	59/63668	2.63105e-05	0.000702013	0.000551595
GO:0009957	epidermal cell fate specification	16/16238	24/63668	2.63939e-05	0.000702013	0.000551595
GO:0010564	regulation of cell cycle process	103/16238	282/63668	2.6884e-05	0.000710716	0.000558433
GO:0016881	acid-amino acid ligase activity	34/16238	70/63668	2.73438e-05	0.000718516	0.000564562
GO:0030137	COPI-coated vesicle	25/16238	46/63668	2.84711e-05	0.000743657	0.000584316
GO:0019750	chloroplast localization	28/16238	54/63668	3.05069e-05	0.000787402	0.000618688
GO:0051644	plastid localization	28/16238	54/63668	3.05069e-05	0.000787402	0.000618688
GO:0000077	DNA damage checkpoint signaling	15/16238	22/63668	3.18077e-05	0.000806659	0.000633819
GO:0010438	cellular response to sulfur starvation	15/16238	22/63668	3.18077e-05	0.000806659	0.000633819
GO:0042770	signal transduction in response to DNA damage	15/16238	22/63668	3.18077e-05	0.000806659	0.000633819
GO:0031625	ubiquitin protein ligase binding	32/16238	65/63668	3.31906e-05	0.000836863	0.000657551
GO:0015936	coenzyme A metabolic process	26/16238	49/63668	3.45422e-05	0.000859875	0.000675632
GO:0004109	coproporphyrinogen oxidase activity	9/16238	10/63668	3.51228e-05	0.000859875	0.000675632
GO:0032436	positive regulation of proteasomal ubiquitin-dependent protein catabolic process	9/16238	10/63668	3.51228e-05	0.000859875	0.000675632
GO:0043393	regulation of protein binding	9/16238	10/63668	3.51228e-05	0.000859875	0.000675632
GO:1900036	positive regulation of cellular response to heat	9/16238	10/63668	3.51228e-05	0.000859875	0.000675632
GO:0045595	regulation of cell differentiation	47/16238	108/63668	3.5286e-05	0.000859875	0.000675632
GO:0000137	Golgi cis cisterna	49/16238	114/63668	3.61061e-05	0.000874971	0.000687493
GO:0030964	NADH dehydrogenase complex	53/16238	126/63668	3.65553e-05	0.000876122	0.000688398
GO:0045271	respiratory chain complex I	53/16238	126/63668	3.65553e-05	0.000876122	0.000688398
GO:0099086	synaptonemal structure	14/16238	20/63668	3.75128e-05	0.000894158	0.00070257
GO:0004029	aldehyde dehydrogenase (NAD+) activity	20/16238	34/63668	3.90945e-05	0.000911927	0.000716532
GO:0044000	movement in host	20/16238	34/63668	3.90945e-05	0.000911927	0.000716532
GO:0046739	transport of virus in multicellular host	20/16238	34/63668	3.90945e-05	0.000911927	0.000716532
GO:0052126	movement in host environment	20/16238	34/63668	3.90945e-05	0.000911927	0.000716532
GO:0016050	vesicle organization	34/16238	71/63668	3.96604e-05	0.000918973	0.000722068
GO:0044273	sulfur compound catabolic process	30/16238	60/63668	3.9818e-05	0.000918973	0.000722068
GO:0010091	trichome branching	42/16238	94/63668	4.25516e-05	0.000975837	0.000766747
GO:0010520	regulation of reciprocal meiotic recombination	13/16238	18/63668	4.29529e-05	0.000975837	0.000766747
GO:0061608	nuclear import signal receptor activity	13/16238	18/63668	4.29529e-05	0.000975837	0.000766747
GO:0022411	cellular component disassembly	70/16238	179/63668	4.33764e-05	0.000980352	0.000770295
GO:0008113	peptide-methionine (S)-S-oxide reductase activity	10/16238	12/63668	4.52995e-05	0.00100814	0.000792133
GO:0032210	regulation of telomere maintenance via telomerase	10/16238	12/63668	4.52995e-05	0.00100814	0.000792133
GO:1904356	regulation of telomere maintenance via telomere lengthening	10/16238	12/63668	4.52995e-05	0.00100814	0.000792133
GO:0033043	regulation of organelle organization	152/16238	449/63668	4.68726e-05	0.00102853	0.000808154
GO:0010184	cytokinin transport	12/16238	16/63668	4.71588e-05	0.00102853	0.000808154
GO:0043813	phosphatidylinositol-3,5-bisphosphate 5-phosphatase activity	12/16238	16/63668	4.71588e-05	0.00102853	0.000808154
GO:1903173	fatty alcohol metabolic process	12/16238	16/63668	4.71588e-05	0.00102853	0.000808154
GO:0010332	response to gamma radiation	23/16238	42/63668	5.04028e-05	0.00109382	0.000859448
GO:0044272	sulfur compound biosynthetic process	150/16238	443/63668	5.16963e-05	0.00111633	0.000877139
GO:0008154	actin polymerization or depolymerization	56/16238	137/63668	5.8792e-05	0.0012633	0.000992621
GO:0001763	morphogenesis of a branching structure	46/16238	107/63668	6.11864e-05	0.0013036	0.00102428
GO:0009707	chloroplast outer membrane	52/16238	125/63668	6.12649e-05	0.0013036	0.00102428
GO:0015179	L-amino acid transmembrane transporter activity	24/16238	45/63668	6.15763e-05	0.00130386	0.00102449
GO:0051640	organelle localization	71/16238	184/63668	6.34984e-05	0.00133807	0.00105136
GO:0005242	inward rectifier potassium channel activity	20/16238	35/63668	6.9349e-05	0.00143833	0.00113015
GO:0016208	AMP binding	15/16238	23/63668	6.98025e-05	0.00143833	0.00113015
GO:0016144	S-glycoside biosynthetic process	59/16238	147/63668	7.05568e-05	0.00143833	0.00113015
GO:0019758	glycosinolate biosynthetic process	59/16238	147/63668	7.05568e-05	0.00143833	0.00113015
GO:0019761	glucosinolate biosynthetic process	59/16238	147/63668	7.05568e-05	0.00143833	0.00113015
GO:0044089	positive regulation of cellular component biogenesis	59/16238	147/63668	7.05568e-05	0.00143833	0.00113015
GO:0046785	microtubule polymerization	32/16238	67/63668	7.05648e-05	0.00143833	0.00113015
GO:0000030	mannosyltransferase activity	28/16238	56/63668	7.12851e-05	0.00144626	0.00113637
GO:0032273	positive regulation of protein polymerization	40/16238	90/63668	7.40075e-05	0.00149454	0.00117431
GO:0048284	organelle fusion	45/16238	105/63668	7.99952e-05	0.00160801	0.00126347
GO:0033897	ribonuclease T2 activity	14/16238	21/63668	8.60083e-05	0.00172096	0.00135221
GO:0051656	establishment of organelle localization	59/16238	148/63668	8.83749e-05	0.00173258	0.00136135
GO:0006476	protein deacetylation	36/16238	79/63668	8.85752e-05	0.00173258	0.00136135
GO:0016575	histone deacetylation	36/16238	79/63668	8.85752e-05	0.00173258	0.00136135
GO:0035601	protein deacylation	36/16238	79/63668	8.85752e-05	0.00173258	0.00136135
GO:0098732	macromolecule deacylation	36/16238	79/63668	8.85752e-05	0.00173258	0.00136135
GO:0071617	lysophospholipid acyltransferase activity	19/16238	33/63668	9.14627e-05	0.00178107	0.00139945
GO:0043624	cellular protein complex disassembly	57/16238	142/63668	9.2233e-05	0.00178809	0.00140496
GO:0009527	plastid outer membrane	55/16238	136/63668	9.5802e-05	0.00184906	0.00145287
GO:0006334	nucleosome assembly	43/16238	100/63668	0.000103866	0.00199124	0.00156458
GO:0000178	exosome (RNase complex)	13/16238	19/63668	0.000104097	0.00199124	0.00156458
GO:0016846	carbon-sulfur lyase activity	44/16238	103/63668	0.000104538	0.00199124	0.00156458
GO:0000966	RNA 5'-end processing	16/16238	26/63668	0.000110864	0.0020755	0.00163079
GO:0001934	positive regulation of protein phosphorylation	16/16238	26/63668	0.000110864	0.0020755	0.00163079
GO:0030874	nucleolar chromatin	16/16238	26/63668	0.000110864	0.0020755	0.00163079
GO:0045860	positive regulation of protein kinase activity	16/16238	26/63668	0.000110864	0.0020755	0.00163079
GO:0045144	meiotic sister chromatid segregation	18/16238	31/63668	0.000120454	0.00223582	0.00175676
GO:0051177	meiotic sister chromatid cohesion	18/16238	31/63668	0.000120454	0.00223582	0.00175676
GO:0009561	megagametogenesis	87/16238	239/63668	0.000122769	0.00226204	0.00177736
GO:0006071	glycerol metabolic process	12/16238	17/63668	0.000122903	0.00226204	0.00177736
GO:0006766	vitamin metabolic process	99/16238	279/63668	0.000134738	0.00244227	0.00191897
GO:0000741	karyogamy	41/16238	95/63668	0.000134826	0.00244227	0.00191897
GO:0010197	polar nucleus fusion	41/16238	95/63668	0.000134826	0.00244227	0.00191897
GO:0031334	positive regulation of protein-containing complex assembly	43/16238	101/63668	0.000136543	0.00244227	0.00191897
GO:0006497	protein lipidation	45/16238	107/63668	0.000136615	0.00244227	0.00191897
GO:0042157	lipoprotein metabolic process	45/16238	107/63668	0.000136615	0.00244227	0.00191897
GO:0042158	lipoprotein biosynthetic process	45/16238	107/63668	0.000136615	0.00244227	0.00191897
GO:0042549	photosystem II stabilization	11/16238	15/63668	0.000140007	0.00249269	0.00195859
GO:0045334	clathrin-coated endocytic vesicle	15/16238	24/63668	0.00014215	0.00252056	0.00198049
GO:0018195	peptidyl-arginine modification	21/16238	39/63668	0.000146929	0.00258364	0.00203005
GO:0018216	peptidyl-arginine methylation	21/16238	39/63668	0.000146929	0.00258364	0.00203005
GO:0031897	Tic complex	9/16238	11/63668	0.000148985	0.00258364	0.00203005
GO:0061927	TOC-TIC supercomplex I	9/16238	11/63668	0.000148985	0.00258364	0.00203005
GO:2000060	positive regulation of ubiquitin-dependent protein catabolic process	9/16238	11/63668	0.000148985	0.00258364	0.00203005
GO:0004084	branched-chain-amino-acid transaminase activity	10/16238	13/63668	0.000151038	0.00258364	0.00203005
GO:0036257	multivesicular body organization	10/16238	13/63668	0.000151038	0.00258364	0.00203005
GO:0080006	internode patterning	10/16238	13/63668	0.000151038	0.00258364	0.00203005
GO:0090353	polygalacturonase inhibitor activity	10/16238	13/63668	0.000151038	0.00258364	0.00203005
GO:0003747	translation release factor activity	19/16238	34/63668	0.000157796	0.00267711	0.00210349
GO:0008079	translation termination factor activity	19/16238	34/63668	0.000157796	0.00267711	0.00210349
GO:0008180	COP9 signalosome	17/16238	29/63668	0.000158343	0.00267711	0.00210349
GO:0010074	maintenance of meristem identity	61/16238	157/63668	0.000159548	0.00268705	0.00211131
GO:0032984	protein-containing complex disassembly	60/16238	154/63668	0.000164386	0.00275788	0.00216696
GO:0031348	negative regulation of defense response	101/16238	287/63668	0.000165351	0.00276345	0.00217133
GO:0016441	posttranscriptional gene silencing	91/16238	254/63668	0.000166847	0.0027778	0.00218261
GO:0010555	response to mannitol	37/16238	84/63668	0.000169501	0.00281127	0.00220891
GO:0051648	vesicle localization	25/16238	50/63668	0.000171474	0.00282253	0.00221776
GO:0051650	establishment of vesicle localization	25/16238	50/63668	0.000171474	0.00282253	0.00221776
GO:0006505	GPI anchor metabolic process	41/16238	96/63668	0.000177746	0.00290385	0.00228165
GO:0006506	GPI anchor biosynthetic process	41/16238	96/63668	0.000177746	0.00290385	0.00228165
GO:0019676	ammonia assimilation cycle	14/16238	22/63668	0.000180859	0.0029111	0.00228735
GO:0036452	ESCRT complex	14/16238	22/63668	0.000180859	0.0029111	0.00228735
GO:0043047	single-stranded telomeric DNA binding	14/16238	22/63668	0.000180859	0.0029111	0.00228735
GO:0098847	sequence-specific single stranded DNA binding	14/16238	22/63668	0.000180859	0.0029111	0.00228735
GO:0016627	oxidoreductase activity, acting on the CH-CH group of donors	81/16238	222/63668	0.000188078	0.00301616	0.00236989
GO:0009684	indoleacetic acid biosynthetic process	20/16238	37/63668	0.000196477	0.00313931	0.00246666
GO:0032271	regulation of protein polymerization	52/16238	130/63668	0.000202327	0.00322099	0.00253084
GO:0006896	Golgi to vacuole transport	16/16238	27/63668	0.000207665	0.00327016	0.00256947
GO:0010076	maintenance of floral meristem identity	16/16238	27/63668	0.000207665	0.00327016	0.00256947
GO:0034314	Arp2/3 complex-mediated actin nucleation	16/16238	27/63668	0.000207665	0.00327016	0.00256947
GO:0031053	primary miRNA processing	18/16238	32/63668	0.000209754	0.00329117	0.00258598
GO:0016471	vacuolar proton-transporting V-type ATPase complex	13/16238	20/63668	0.000227753	0.00353544	0.00277791
GO:0070628	proteasome binding	13/16238	20/63668	0.000227753	0.00353544	0.00277791
GO:0089718	amino acid import across plasma membrane	13/16238	20/63668	0.000227753	0.00353544	0.00277791
GO:0046470	phosphatidylcholine metabolic process	38/16238	88/63668	0.000229588	0.00355129	0.00279037
GO:0031050	dsRNA processing	66/16238	175/63668	0.000242955	0.00373159	0.00293203
GO:0070918	production of small RNA involved in gene silencing by RNA	66/16238	175/63668	0.000242955	0.00373159	0.00293203
GO:0031047	gene silencing by RNA	121/16238	357/63668	0.000244127	0.00373642	0.00293583
GO:0006302	double-strand break repair	86/16238	240/63668	0.000245252	0.00374052	0.00293905
GO:0048766	root hair initiation	30/16238	65/63668	0.000252113	0.00381942	0.00300105
GO:0016620	oxidoreductase activity, acting on the aldehyde or oxo group of donors, NAD or NADP as acceptor	65/16238	172/63668	0.000252177	0.00381942	0.00300105
GO:0008238	exopeptidase activity	97/16238	277/63668	0.000267739	0.0040411	0.00317523
GO:0004618	phosphoglycerate kinase activity	15/16238	25/63668	0.000271525	0.00406333	0.00319269
GO:0006268	DNA unwinding involved in DNA replication	15/16238	25/63668	0.000271525	0.00406333	0.00319269
GO:0030126	COPI vesicle coat	22/16238	43/63668	0.000272938	0.00406333	0.00319269
GO:0030663	COPI-coated vesicle membrane	22/16238	43/63668	0.000272938	0.00406333	0.00319269
GO:0106018	phosphatidylinositol-3,5-bisphosphate phosphatase activity	12/16238	18/63668	0.000282803	0.00419587	0.00329684
GO:1901987	regulation of cell cycle phase transition	46/16238	113/63668	0.000286027	0.00422932	0.00332312
GO:1901659	glycosyl compound biosynthetic process	61/16238	160/63668	0.000291416	0.00429444	0.00337429
GO:0045787	positive regulation of cell cycle	44/16238	107/63668	0.000294208	0.004321	0.00339515
GO:0007135	meiosis II	27/16238	57/63668	0.000299823	0.00437401	0.00343681
GO:0061983	meiosis II cell cycle process	27/16238	57/63668	0.000299823	0.00437401	0.00343681
GO:0015919	peroxisomal membrane transport	23/16238	46/63668	0.00030887	0.00449097	0.0035287
GO:0000347	THO complex	20/16238	38/63668	0.00031566	0.00457444	0.00359429
GO:1901658	glycosyl compound catabolic process	28/16238	60/63668	0.00031886	0.00460553	0.00361871
GO:0016651	oxidoreductase activity, acting on NAD(P)H	68/16238	183/63668	0.000324482	0.00467126	0.00367036
GO:0006486	protein glycosylation	125/16238	373/63668	0.000328689	0.00468543	0.0036815
GO:0009101	glycoprotein biosynthetic process	125/16238	373/63668	0.000328689	0.00468543	0.0036815
GO:0043413	macromolecule glycosylation	125/16238	373/63668	0.000328689	0.00468543	0.0036815
GO:0004252	serine-type endopeptidase activity	127/16238	380/63668	0.000335663	0.00476925	0.00374736
GO:0051213	dioxygenase activity	82/16238	229/63668	0.000344764	0.00488267	0.00383648
GO:0006903	vesicle targeting	18/16238	33/63668	0.000351703	0.0049488	0.00388844
GO:1902850	microtubule cytoskeleton organization involved in mitosis	18/16238	33/63668	0.000351703	0.0049488	0.00388844
GO:0000097	sulfur amino acid biosynthetic process	46/16238	114/63668	0.000362015	0.00507752	0.00398958
GO:0010439	regulation of glucosinolate biosynthetic process	21/16238	41/63668	0.000366761	0.0051229	0.00402523
GO:0008477	purine nucleosidase activity	16/16238	28/63668	0.000369948	0.0051229	0.00402523
GO:0009164	nucleoside catabolic process	16/16238	28/63668	0.000369948	0.0051229	0.00402523
GO:0034656	nucleobase-containing small molecule catabolic process	16/16238	28/63668	0.000369948	0.0051229	0.00402523
GO:0000373	Group II intron splicing	35/16238	81/63668	0.000391919	0.00540096	0.00424371
GO:0022900	electron transport chain	95/16238	273/63668	0.000392504	0.00540096	0.00424371
GO:0000795	synaptonemal complex	10/16238	14/63668	0.000407079	0.00546362	0.00429295
GO:0004751	ribose-5-phosphate isomerase activity	10/16238	14/63668	0.000407079	0.00546362	0.00429295
GO:0006148	inosine catabolic process	10/16238	14/63668	0.000407079	0.00546362	0.00429295
GO:0009052	pentose-phosphate shunt, non-oxidative branch	10/16238	14/63668	0.000407079	0.00546362	0.00429295
GO:0045836	positive regulation of meiotic nuclear division	10/16238	14/63668	0.000407079	0.00546362	0.00429295
GO:0046102	inosine metabolic process	10/16238	14/63668	0.000407079	0.00546362	0.00429295
GO:0046130	purine ribonucleoside catabolic process	10/16238	14/63668	0.000407079	0.00546362	0.00429295
GO:0051785	positive regulation of nuclear division	10/16238	14/63668	0.000407079	0.00546362	0.00429295
GO:0042555	MCM complex	22/16238	44/63668	0.000415022	0.00555315	0.00436329
GO:0070085	glycosylation	129/16238	389/63668	0.000432649	0.0057713	0.0045347
GO:0000280	nuclear division	151/16238	465/63668	0.000437932	0.00582396	0.00457608
GO:0043090	amino acid import	13/16238	21/63668	0.000458087	0.00599018	0.00470668
GO:0080046	quercetin 4'-O-glucosyltransferase activity	13/16238	21/63668	0.000458087	0.00599018	0.00470668
GO:1905354	exoribonuclease complex	13/16238	21/63668	0.000458087	0.00599018	0.00470668
GO:0006570	tyrosine metabolic process	23/16238	47/63668	0.00045967	0.00599018	0.00470668
GO:0003958	NADPH-hemoprotein reductase activity	9/16238	12/63668	0.000460044	0.00599018	0.00470668
GO:0009001	serine O-acetyltransferase activity	9/16238	12/63668	0.000460044	0.00599018	0.00470668
GO:0016412	serine O-acyltransferase activity	9/16238	12/63668	0.000460044	0.00599018	0.00470668
GO:0035194	post-transcriptional gene silencing by RNA	79/16238	221/63668	0.000463211	0.00601347	0.00472498
GO:0009086	methionine biosynthetic process	29/16238	64/63668	0.00046526	0.00602216	0.00473181
GO:0003724	RNA helicase activity	30/16238	67/63668	0.000480557	0.00612613	0.0048135
GO:0030030	cell projection organization	8/16238	10/63668	0.00048172	0.00612613	0.0048135
GO:0030031	cell projection assembly	8/16238	10/63668	0.00048172	0.00612613	0.0048135
GO:0047918	GDP-mannose 3,5-epimerase activity	8/16238	10/63668	0.00048172	0.00612613	0.0048135
GO:0061908	phagophore	8/16238	10/63668	0.00048172	0.00612613	0.0048135
GO:0070601	centromeric sister chromatid cohesion	8/16238	10/63668	0.00048172	0.00612613	0.0048135
GO:0009267	cellular response to starvation	155/16238	480/63668	0.000491288	0.00620071	0.00487211
GO:0007031	peroxisome organization	42/16238	103/63668	0.000491864	0.00620071	0.00487211
GO:0007155	cell adhesion	20/16238	39/63668	0.000493271	0.00620071	0.00487211
GO:0022610	biological adhesion	20/16238	39/63668	0.000493271	0.00620071	0.00487211
GO:0005338	nucleotide-sugar transmembrane transporter activity	41/16238	100/63668	0.00049915	0.00625658	0.00491601
GO:0009880	embryonic pattern specification	34/16238	79/63668	0.000514747	0.0064336	0.0050551
GO:0035304	regulation of protein dephosphorylation	25/16238	53/63668	0.000536372	0.00668473	0.00525242
GO:0010581	regulation of starch biosynthetic process	21/16238	42/63668	0.000558143	0.00691653	0.00543455
GO:0042162	telomeric DNA binding	21/16238	42/63668	0.000558143	0.00691653	0.00543455
GO:0010196	nonphotochemical quenching	26/16238	56/63668	0.000568054	0.00699958	0.0054998
GO:1990066	energy quenching	26/16238	56/63668	0.000568054	0.00699958	0.0054998
GO:0031112	positive regulation of microtubule polymerization or depolymerization	18/16238	34/63668	0.000569849	0.00700192	0.00550164
GO:0051302	regulation of cell division	81/16238	229/63668	0.000573877	0.0070316	0.00552496
GO:0042816	vitamin B6 metabolic process	12/16238	19/63668	0.000589156	0.00717849	0.00564038
GO:0042819	vitamin B6 biosynthetic process	12/16238	19/63668	0.000589156	0.00717849	0.00564038
GO:0006661	phosphatidylinositol biosynthetic process	62/16238	167/63668	0.000593083	0.00720621	0.00566216
GO:0006260	DNA replication	140/16238	430/63668	0.000609733	0.00738793	0.00580494
GO:0031540	regulation of anthocyanin biosynthetic process	22/16238	45/63668	0.000617558	0.00746201	0.00586315
GO:1900424	regulation of defense response to bacterium	65/16238	177/63668	0.000623788	0.00751647	0.00590594
GO:0043254	regulation of protein-containing complex assembly	55/16238	145/63668	0.000647267	0.00777791	0.00611136
GO:0045596	negative regulation of cell differentiation	14/16238	24/63668	0.000649665	0.00778527	0.00611714
GO:0008186	ATPase, acting on RNA	30/16238	68/63668	0.000651837	0.00778989	0.00612078
GO:0042644	chloroplast nucleoid	48/16238	123/63668	0.000669723	0.00796073	0.00625501
GO:0030308	negative regulation of cell growth	37/16238	89/63668	0.000669782	0.00796073	0.00625501
GO:0044770	cell cycle phase transition	53/16238	139/63668	0.00069596	0.00824939	0.00648182
GO:0000276	mitochondrial proton-transporting ATP synthase complex, coupling factor F(o)	11/16238	17/63668	0.000750117	0.00883376	0.00694098
GO:0031542	positive regulation of anthocyanin biosynthetic process	11/16238	17/63668	0.000750117	0.00883376	0.00694098
GO:0099094	ligand-gated cation channel activity	20/16238	40/63668	0.000751336	0.00883376	0.00694098
GO:0090068	positive regulation of cell cycle process	25/16238	54/63668	0.000758604	0.00889525	0.00698929
GO:0004143	diacylglycerol kinase activity	17/16238	32/63668	0.00076663	0.00894128	0.00702546
GO:0007205	protein kinase C-activating G protein-coupled receptor signaling pathway	17/16238	32/63668	0.00076663	0.00894128	0.00702546
GO:0009064	glutamine family amino acid metabolic process	55/16238	146/63668	0.00078341	0.00911262	0.00716009
GO:0098813	nuclear chromosome segregation	100/16238	295/63668	0.000786882	0.00912866	0.00717269
GO:0010008	endosome membrane	40/16238	99/63668	0.000819329	0.00947988	0.00744866
GO:0000578	embryonic axis specification	21/16238	43/63668	0.000830384	0.00958237	0.00752919
GO:0032886	regulation of microtubule-based process	39/16238	96/63668	0.000834582	0.0096054	0.00754729
GO:0006571	tyrosine biosynthetic process	15/16238	27/63668	0.000844285	0.0096915	0.00761493
GO:0030875	rDNA protrusion	13/16238	22/63668	0.000858528	0.0098034	0.00770286
GO:0072337	modified amino acid transport	13/16238	22/63668	0.000858528	0.0098034	0.00770286
GO:0043021	ribonucleoprotein complex binding	35/16238	84/63668	0.000879032	0.0100113	0.00786623
GO:0044389	ubiquitin-like protein ligase binding	32/16238	75/63668	0.000886738	0.0100728	0.00791453
GO:0031113	regulation of microtubule polymerization	18/16238	35/63668	0.000894932	0.0101395	0.00796692
GO:0006415	translational termination	22/16238	46/63668	0.000900521	0.0101501	0.00797524
GO:0009119	ribonucleoside metabolic process	22/16238	46/63668	0.000900521	0.0101501	0.00797524
GO:0030176	integral component of endoplasmic reticulum membrane	44/16238	112/63668	0.000931625	0.0104467	0.00820829
GO:0031227	intrinsic component of endoplasmic reticulum membrane	44/16238	112/63668	0.000931625	0.0104467	0.00820829
GO:0040029	regulation of gene expression, epigenetic	77/16238	219/63668	0.000937291	0.0104735	0.00822937
GO:0009514	glyoxysome	10/16238	15/63668	0.000941222	0.0104735	0.00822937
GO:0016233	telomere capping	10/16238	15/63668	0.000941222	0.0104735	0.00822937
GO:0010109	regulation of photosynthesis	59/16238	160/63668	0.000959213	0.0106465	0.00836534
GO:1902495	transmembrane transporter complex	66/16238	183/63668	0.000987671	0.0109346	0.00859166
GO:0048232	male gamete generation	81/16238	233/63668	0.00103135	0.0113892	0.00894887
GO:0035196	production of miRNAs involved in gene silencing by miRNA	38/16238	94/63668	0.00107761	0.0118692	0.00932599
GO:0002683	negative regulation of immune system process	74/16238	210/63668	0.00108297	0.0118692	0.00932599
GO:0050777	negative regulation of immune response	74/16238	210/63668	0.00108297	0.0118692	0.00932599
GO:0009970	cellular response to sulfate starvation	26/16238	58/63668	0.00109162	0.0119339	0.00937686
GO:0044772	mitotic cell cycle phase transition	37/16238	91/63668	0.0010977	0.0119704	0.00940553
GO:0042180	cellular ketone metabolic process	130/16238	401/63668	0.00111263	0.012103	0.00950973
GO:0002238	response to molecule of fungal origin	36/16238	88/63668	0.00111581	0.0121073	0.00951314
GO:0043022	ribosome binding	27/16238	61/63668	0.00111885	0.0121102	0.0095154
GO:1902347	response to strigolactone	12/16238	20/63668	0.00113126	0.0122143	0.00959716
GO:0000026	alpha-1,2-mannosyltransferase activity	9/16238	13/63668	0.00115531	0.0122858	0.00965334
GO:0006573	valine metabolic process	9/16238	13/63668	0.00115531	0.0122858	0.00965334
GO:0008614	pyridoxine metabolic process	9/16238	13/63668	0.00115531	0.0122858	0.00965334
GO:0008615	pyridoxine biosynthetic process	9/16238	13/63668	0.00115531	0.0122858	0.00965334
GO:0033306	phytol metabolic process	9/16238	13/63668	0.00115531	0.0122858	0.00965334
GO:0034635	glutathione transport	9/16238	13/63668	0.00115531	0.0122858	0.00965334
GO:0033176	proton-transporting V-type ATPase complex	30/16238	70/63668	0.00116042	0.0122858	0.00965334
GO:0047262	polygalacturonate 4-alpha-galacturonosyltransferase activity	30/16238	70/63668	0.00116042	0.0122858	0.00965334
GO:0006743	ubiquinone metabolic process	21/16238	44/63668	0.00120963	0.0127142	0.00998997
GO:0006744	ubiquinone biosynthetic process	21/16238	44/63668	0.00120963	0.0127142	0.00998997
GO:0008272	sulfate transport	21/16238	44/63668	0.00120963	0.0127142	0.00998997
GO:0098803	respiratory chain complex	80/16238	231/63668	0.00124768	0.0130826	0.0102794
GO:1901617	organic hydroxy compound biosynthetic process	148/16238	465/63668	0.00125516	0.0131103	0.0103012
GO:1901293	nucleoside phosphate biosynthetic process	144/16238	451/63668	0.00125633	0.0131103	0.0103012
GO:0098798	mitochondrial protein-containing complex	118/16238	361/63668	0.00131695	0.0137102	0.0107725
GO:0016143	S-glycoside metabolic process	104/16238	313/63668	0.00134585	0.0139113	0.0109306
GO:0019757	glycosinolate metabolic process	104/16238	313/63668	0.00134585	0.0139113	0.0109306
GO:0019760	glucosinolate metabolic process	104/16238	313/63668	0.00134585	0.0139113	0.0109306
GO:0051865	protein autoubiquitination	23/16238	50/63668	0.00135448	0.0139199	0.0109373
GO:0003841	1-acylglycerol-3-phosphate O-acyltransferase activity	8/16238	11/63668	0.00136901	0.0139199	0.0109373
GO:0031463	Cul3-RING ubiquitin ligase complex	8/16238	11/63668	0.00136901	0.0139199	0.0109373
GO:0042539	hypotonic salinity response	8/16238	11/63668	0.00136901	0.0139199	0.0109373
GO:0048259	regulation of receptor-mediated endocytosis	8/16238	11/63668	0.00136901	0.0139199	0.0109373
GO:0080048	GDP-D-glucose phosphorylase activity	8/16238	11/63668	0.00136901	0.0139199	0.0109373
GO:2000369	regulation of clathrin-dependent endocytosis	8/16238	11/63668	0.00136901	0.0139199	0.0109373
GO:0000245	spliceosomal complex assembly	15/16238	28/63668	0.0013916	0.0141166	0.0110919
GO:0070469	respirasome	80/16238	232/63668	0.00143395	0.0145125	0.011403
GO:0031109	microtubule polymerization or depolymerization	35/16238	86/63668	0.00144524	0.014593	0.0114662
GO:0051445	regulation of meiotic cell cycle	25/16238	56/63668	0.00145072	0.0146144	0.011483
GO:0008934	inositol monophosphate 1-phosphatase activity	11/16238	18/63668	0.00148447	0.0148856	0.0116961
GO:0052834	inositol monophosphate phosphatase activity	11/16238	18/63668	0.00148447	0.0148856	0.0116961
GO:0055067	monovalent inorganic cation homeostasis	48/16238	127/63668	0.00149908	0.0149977	0.0117842
GO:0000469	cleavage involved in rRNA processing	13/16238	23/63668	0.00151492	0.0150183	0.0118004
GO:0034471	ncRNA 5'-end processing	13/16238	23/63668	0.00151492	0.0150183	0.0118004
GO:0043102	amino acid salvage	13/16238	23/63668	0.00151492	0.0150183	0.0118004
GO:0071267	L-methionine salvage	13/16238	23/63668	0.00151492	0.0150183	0.0118004
GO:1901990	regulation of mitotic cell cycle phase transition	30/16238	71/63668	0.00152432	0.0150453	0.0118216
GO:0006650	glycerophospholipid metabolic process	144/16238	453/63668	0.00152454	0.0150453	0.0118216
GO:0016469	proton-transporting two-sector ATPase complex	52/16238	140/63668	0.00153918	0.0151555	0.0119082
GO:0022412	cellular process involved in reproduction in multicellular organism	86/16238	253/63668	0.00158772	0.0155983	0.0122561
GO:0009595	detection of biotic stimulus	20/16238	42/63668	0.00162619	0.0158837	0.0124803
GO:0098581	detection of external biotic stimulus	20/16238	42/63668	0.00162619	0.0158837	0.0124803
GO:0016273	arginine N-methyltransferase activity	16/16238	31/63668	0.00163134	0.0158837	0.0124803
GO:0016274	protein-arginine N-methyltransferase activity	16/16238	31/63668	0.00163134	0.0158837	0.0124803
GO:0098800	inner mitochondrial membrane protein complex	111/16238	339/63668	0.00167556	0.016278	0.0127901
GO:0010769	regulation of cell morphogenesis involved in differentiation	37/16238	93/63668	0.00174775	0.0169415	0.0133115
GO:0000375	RNA splicing, via transesterification reactions	129/16238	402/63668	0.00176448	0.017028	0.0133795
GO:0000377	RNA splicing, via transesterification reactions with bulged adenosine as nucleophile	129/16238	402/63668	0.00176448	0.017028	0.0133795
GO:0006873	cellular ion homeostasis	112/16238	343/63668	0.00177894	0.0171296	0.0134593
GO:0009225	nucleotide-sugar metabolic process	36/16238	90/63668	0.00179085	0.0172063	0.0135196
GO:0051026	chiasma assembly	22/16238	48/63668	0.00181101	0.0173238	0.0136119
GO:0051346	negative regulation of hydrolase activity	22/16238	48/63668	0.00181101	0.0173238	0.0136119
GO:0046128	purine ribonucleoside metabolic process	17/16238	34/63668	0.00184513	0.0175795	0.0138128
GO:0007276	gamete generation	93/16238	278/63668	0.00184581	0.0175795	0.0138128
GO:0008252	nucleotidase activity	14/16238	26/63668	0.00187798	0.017847	0.0140229
GO:0005746	mitochondrial respirasome	74/16238	214/63668	0.00193322	0.0180458	0.0141792
GO:0009654	photosystem II oxygen evolving complex	32/16238	78/63668	0.00193595	0.0180458	0.0141792
GO:0006278	RNA-dependent DNA biosynthetic process	10/16238	16/63668	0.00193614	0.0180458	0.0141792
GO:0007004	telomere maintenance via telomerase	10/16238	16/63668	0.00193614	0.0180458	0.0141792
GO:0009652	thigmotropism	10/16238	16/63668	0.00193614	0.0180458	0.0141792
GO:0010833	telomere maintenance via telomere lengthening	10/16238	16/63668	0.00193614	0.0180458	0.0141792
GO:0048497	maintenance of floral organ identity	10/16238	16/63668	0.00193614	0.0180458	0.0141792
GO:0090700	maintenance of plant organ identity	10/16238	16/63668	0.00193614	0.0180458	0.0141792
GO:0110096	cellular response to aldehyde	10/16238	16/63668	0.00193614	0.0180458	0.0141792
GO:0051539	4 iron, 4 sulfur cluster binding	28/16238	66/63668	0.0020031	0.0186301	0.0146383
GO:0070402	NADPH binding	12/16238	21/63668	0.00202883	0.018768	0.0147466
GO:0007020	microtubule nucleation	18/16238	37/63668	0.00203083	0.018768	0.0147466
GO:0140303	intramembrane lipid transporter activity	18/16238	37/63668	0.00203083	0.018768	0.0147466
GO:0044282	small molecule catabolic process	151/16238	481/63668	0.00208336	0.0192127	0.0150961
GO:0016879	ligase activity, forming carbon-nitrogen bonds	75/16238	218/63668	0.00211258	0.0194411	0.0152755
GO:0007015	actin filament organization	72/16238	208/63668	0.00213592	0.0196145	0.0154117
GO:0003886	DNA (cytosine-5-)-methyltransferase activity	15/16238	29/63668	0.00220718	0.0201839	0.0158592
GO:0009008	DNA-methyltransferase activity	15/16238	29/63668	0.00220718	0.0201839	0.0158592
GO:0006109	regulation of carbohydrate metabolic process	94/16238	283/63668	0.00223188	0.020367	0.0160031
GO:0016558	protein import into peroxisome matrix	20/16238	43/63668	0.0023182	0.0210666	0.0165527
GO:0033177	proton-transporting two-sector ATPase complex, proton-transporting domain	20/16238	43/63668	0.0023182	0.0210666	0.0165527
GO:0005743	mitochondrial inner membrane	137/16238	433/63668	0.00235524	0.0213587	0.0167823
GO:0042752	regulation of circadian rhythm	53/16238	146/63668	0.00248862	0.0222286	0.0174657
GO:0008757	S-adenosylmethionine-dependent methyltransferase activity	120/16238	374/63668	0.00248988	0.0222286	0.0174657
GO:0072657	protein localization to membrane	63/16238	179/63668	0.00249222	0.0222286	0.0174657
GO:1902882	regulation of response to oxidative stress	16/16238	32/63668	0.00249604	0.0222286	0.0174657
GO:0003730	mRNA 3'-UTR binding	9/16238	14/63668	0.00250212	0.0222286	0.0174657
GO:0005929	cilium	9/16238	14/63668	0.00250212	0.0222286	0.0174657
GO:0032434	regulation of proteasomal ubiquitin-dependent protein catabolic process	9/16238	14/63668	0.00250212	0.0222286	0.0174657
GO:0046741	transport of virus in host, tissue to tissue	9/16238	14/63668	0.00250212	0.0222286	0.0174657
GO:0090522	vesicle tethering involved in exocytosis	9/16238	14/63668	0.00250212	0.0222286	0.0174657
GO:0140029	exocytic process	9/16238	14/63668	0.00250212	0.0222286	0.0174657
GO:0000154	rRNA modification	13/16238	24/63668	0.00253748	0.0223155	0.0175341
GO:0009065	glutamine family amino acid catabolic process	13/16238	24/63668	0.00253748	0.0223155	0.0175341
GO:0017053	transcription repressor complex	13/16238	24/63668	0.00253748	0.0223155	0.0175341
GO:0042454	ribonucleoside catabolic process	13/16238	24/63668	0.00253748	0.0223155	0.0175341
GO:0110102	ribulose bisphosphate carboxylase complex assembly	13/16238	24/63668	0.00253748	0.0223155	0.0175341
GO:0044030	regulation of DNA methylation	23/16238	52/63668	0.00256249	0.0224545	0.0176433
GO:0009165	nucleotide biosynthetic process	141/16238	448/63668	0.00256359	0.0224545	0.0176433
GO:0006284	base-excision repair	24/16238	55/63668	0.00260265	0.022751	0.0178762
GO:0035303	regulation of dephosphorylation	28/16238	67/63668	0.00261369	0.0228018	0.0179162
GO:0010363	regulation of plant-type hypersensitive response	27/16238	64/63668	0.00262953	0.0228632	0.0179643
GO:0016903	oxidoreductase activity, acting on the aldehyde or oxo group of donors	76/16238	223/63668	0.0026312	0.0228632	0.0179643
GO:1901607	alpha-amino acid biosynthetic process	138/16238	438/63668	0.00270277	0.0234383	0.0184163
GO:0048530	fruit morphogenesis	11/16238	19/63668	0.00271552	0.0235022	0.0184664
GO:0034755	iron ion transmembrane transport	17/16238	35/63668	0.00274254	0.023689	0.0186133
GO:0001558	regulation of cell growth	118/16238	368/63668	0.00274958	0.0237029	0.0186241
GO:0030258	lipid modification	93/16238	282/63668	0.00296709	0.0255275	0.0200578
GO:0045551	cinnamyl-alcohol dehydrogenase activity	14/16238	27/63668	0.00299119	0.0256842	0.0201809
GO:1902903	regulation of supramolecular fiber organization	52/16238	144/63668	0.0030797	0.0263922	0.0207372
GO:0016849	phosphorus-oxygen lyase activity	19/16238	41/63668	0.00311281	0.0264853	0.0208104
GO:0009100	glycoprotein metabolic process	129/16238	408/63668	0.00316333	0.0264853	0.0208104
GO:0005093	Rab GDP-dissociation inhibitor activity	8/16238	12/63668	0.00318695	0.0264853	0.0208104
GO:0010069	zygote asymmetric cytokinesis in embryo sac	8/16238	12/63668	0.00318695	0.0264853	0.0208104
GO:0010623	programmed cell death involved in cell development	8/16238	12/63668	0.00318695	0.0264853	0.0208104
GO:0015271	outward rectifier potassium channel activity	8/16238	12/63668	0.00318695	0.0264853	0.0208104
GO:0019144	ADP-sugar diphosphatase activity	8/16238	12/63668	0.00318695	0.0264853	0.0208104
GO:0030611	arsenate reductase activity	8/16238	12/63668	0.00318695	0.0264853	0.0208104
GO:0036002	pre-mRNA binding	8/16238	12/63668	0.00318695	0.0264853	0.0208104
GO:0046349	amino sugar biosynthetic process	8/16238	12/63668	0.00318695	0.0264853	0.0208104
GO:0048227	plasma membrane to endosome transport	8/16238	12/63668	0.00318695	0.0264853	0.0208104
GO:0051938	L-glutamate import	8/16238	12/63668	0.00318695	0.0264853	0.0208104
GO:0080041	ADP-ribose pyrophosphohydrolase activity	8/16238	12/63668	0.00318695	0.0264853	0.0208104
GO:0098712	L-glutamate import across plasma membrane	8/16238	12/63668	0.00318695	0.0264853	0.0208104
GO:0010112	regulation of systemic acquired resistance	31/16238	77/63668	0.00319378	0.0264853	0.0208104
GO:0080092	regulation of pollen tube growth	31/16238	77/63668	0.00319378	0.0264853	0.0208104
GO:1901988	negative regulation of cell cycle phase transition	31/16238	77/63668	0.00319378	0.0264853	0.0208104
GO:0006605	protein targeting	145/16238	465/63668	0.00331035	0.0273999	0.021529
GO:0030010	establishment of cell polarity	21/16238	47/63668	0.00333846	0.0275281	0.0216298
GO:0046838	phosphorylated carbohydrate dephosphorylation	21/16238	47/63668	0.00333846	0.0275281	0.0216298
GO:0046889	positive regulation of lipid biosynthetic process	28/16238	68/63668	0.00337577	0.0277822	0.0218294
GO:0005815	microtubule organizing center	15/16238	30/63668	0.00338201	0.0277822	0.0218294
GO:0007292	female gamete generation	27/16238	65/63668	0.00341868	0.0280306	0.0220246
GO:0009041	uridylate kinase activity	12/16238	22/63668	0.00343319	0.0280733	0.0220581
GO:0008081	phosphoric diester hydrolase activity	68/16238	198/63668	0.00344946	0.0280733	0.0220581
GO:0030838	positive regulation of actin filament polymerization	26/16238	62/63668	0.00344963	0.0280733	0.0220581
GO:0045010	actin nucleation	26/16238	62/63668	0.00344963	0.0280733	0.0220581
GO:0071103	DNA conformation change	109/16238	339/63668	0.00351275	0.0285337	0.0224199
GO:0009066	aspartate family amino acid metabolic process	62/16238	178/63668	0.00351937	0.0285344	0.0224204
GO:0008408	3'-5' exonuclease activity	45/16238	122/63668	0.00355913	0.0288032	0.0226316
GO:0045926	negative regulation of growth	52/16238	145/63668	0.00362803	0.0293065	0.0230271
GO:0043648	dicarboxylic acid metabolic process	64/16238	185/63668	0.00367358	0.0294142	0.0231117
GO:0098657	import into cell	34/16238	87/63668	0.00368704	0.0294142	0.0231117
GO:0000105	histidine biosynthetic process	16/16238	33/63668	0.0037088	0.0294142	0.0231117
GO:0005544	calcium-dependent phospholipid binding	16/16238	33/63668	0.0037088	0.0294142	0.0231117
GO:0006547	histidine metabolic process	16/16238	33/63668	0.0037088	0.0294142	0.0231117
GO:0009089	lysine biosynthetic process via diaminopimelate	16/16238	33/63668	0.0037088	0.0294142	0.0231117
GO:0030008	TRAPP complex	16/16238	33/63668	0.0037088	0.0294142	0.0231117
GO:0033674	positive regulation of kinase activity	16/16238	33/63668	0.0037088	0.0294142	0.0231117
GO:0042327	positive regulation of phosphorylation	16/16238	33/63668	0.0037088	0.0294142	0.0231117
GO:0046451	diaminopimelate metabolic process	16/16238	33/63668	0.0037088	0.0294142	0.0231117
GO:0006997	nucleus organization	51/16238	142/63668	0.00380432	0.030117	0.0236639
GO:0031301	integral component of organelle membrane	103/16238	319/63668	0.00385748	0.0304825	0.0239511
GO:0098656	anion transmembrane transport	105/16238	326/63668	0.00387176	0.03054	0.0239963
GO:0003979	UDP-glucose 6-dehydrogenase activity	7/16238	10/63668	0.00396168	0.0308586	0.0242467
GO:0004019	adenylosuccinate synthase activity	7/16238	10/63668	0.00396168	0.0308586	0.0242467
GO:0010270	photosystem II oxygen evolving complex assembly	7/16238	10/63668	0.00396168	0.0308586	0.0242467
GO:0010325	raffinose family oligosaccharide biosynthetic process	7/16238	10/63668	0.00396168	0.0308586	0.0242467
GO:0035865	cellular response to potassium ion	7/16238	10/63668	0.00396168	0.0308586	0.0242467
GO:0046398	UDP-glucuronate metabolic process	7/16238	10/63668	0.00396168	0.0308586	0.0242467
GO:0051377	mannose-ethanolamine phosphotransferase activity	7/16238	10/63668	0.00396168	0.0308586	0.0242467
GO:0005779	integral component of peroxisomal membrane	13/16238	25/63668	0.00406125	0.0313543	0.0246361
GO:0006152	purine nucleoside catabolic process	13/16238	25/63668	0.00406125	0.0313543	0.0246361
GO:0030007	cellular potassium ion homeostasis	13/16238	25/63668	0.00406125	0.0313543	0.0246361
GO:0031231	intrinsic component of peroxisomal membrane	13/16238	25/63668	0.00406125	0.0313543	0.0246361
GO:0140296	general transcription initiation factor binding	13/16238	25/63668	0.00406125	0.0313543	0.0246361
GO:0019722	calcium-mediated signaling	28/16238	69/63668	0.00431756	0.0332742	0.0261447
GO:0031072	heat shock protein binding	27/16238	66/63668	0.0043987	0.0338397	0.026589
GO:0009694	jasmonic acid metabolic process	40/16238	107/63668	0.00440656	0.0338405	0.0265896
GO:0042278	purine nucleoside metabolic process	20/16238	45/63668	0.00445346	0.0340807	0.0267783
GO:1905156	negative regulation of photosynthesis	20/16238	45/63668	0.00445346	0.0340807	0.0267783
GO:0051701	biological process involved in interaction with host	25/16238	60/63668	0.00452224	0.0345464	0.0271443
GO:0072523	purine-containing compound catabolic process	22/16238	51/63668	0.00456525	0.034764	0.0273153
GO:0010020	chloroplast fission	23/16238	54/63668	0.00457463	0.034764	0.0273153
GO:0043572	plastid fission	23/16238	54/63668	0.00457463	0.034764	0.0273153
GO:0031116	positive regulation of microtubule polymerization	14/16238	28/63668	0.00459079	0.0348261	0.027364
GO:0006690	icosanoid metabolic process	11/16238	20/63668	0.00465183	0.0349248	0.0274415
GO:0010597	green leaf volatile biosynthetic process	11/16238	20/63668	0.00465183	0.0349248	0.0274415
GO:0019372	lipoxygenase pathway	11/16238	20/63668	0.00465183	0.0349248	0.0274415
GO:0034969	histone arginine methylation	11/16238	20/63668	0.00465183	0.0349248	0.0274415
GO:0042939	tripeptide transport	11/16238	20/63668	0.00465183	0.0349248	0.0274415
GO:0045263	proton-transporting ATP synthase complex, coupling factor F(o)	11/16238	20/63668	0.00465183	0.0349248	0.0274415
GO:0043621	protein self-association	99/16238	307/63668	0.00471895	0.0353678	0.0277896
GO:0004832	valine-tRNA ligase activity	9/16238	15/63668	0.00484346	0.0359918	0.0282799
GO:0006438	valyl-tRNA aminoacylation	9/16238	15/63668	0.00484346	0.0359918	0.0282799
GO:0010071	root meristem specification	9/16238	15/63668	0.00484346	0.0359918	0.0282799
GO:0048199	vesicle targeting, to, from or within Golgi	9/16238	15/63668	0.00484346	0.0359918	0.0282799
GO:2000058	regulation of ubiquitin-dependent protein catabolic process	9/16238	15/63668	0.00484346	0.0359918	0.0282799
GO:0015780	nucleotide-sugar transmembrane transport	42/16238	114/63668	0.00485568	0.0360212	0.0283031
GO:0140359	ABC-type transporter activity	133/16238	427/63668	0.00491943	0.0364321	0.028626
GO:0030041	actin filament polymerization	37/16238	98/63668	0.00498039	0.0368211	0.0289316
GO:0010225	response to UV-C	15/16238	31/63668	0.00502327	0.0369848	0.0290602
GO:0071219	cellular response to molecule of bacterial origin	15/16238	31/63668	0.00502327	0.0369848	0.0290602
GO:0060429	epithelium development	31/16238	79/63668	0.00502797	0.0369848	0.0290602
GO:0019867	outer membrane	97/16238	301/63668	0.0052204	0.0383357	0.0301216
GO:2000280	regulation of root development	54/16238	154/63668	0.00525129	0.0384977	0.0302489
GO:0048471	perinuclear region of cytoplasm	29/16238	73/63668	0.00532872	0.0389998	0.0306434
GO:0009085	lysine biosynthetic process	16/16238	34/63668	0.0053654	0.0390716	0.0306998
GO:0010120	camalexin biosynthetic process	16/16238	34/63668	0.0053654	0.0390716	0.0306998
GO:0052317	camalexin metabolic process	16/16238	34/63668	0.0053654	0.0390716	0.0306998
GO:0051261	protein depolymerization	35/16238	92/63668	0.00538647	0.0391597	0.030769
GO:0000911	cytokinesis by cell plate formation	67/16238	198/63668	0.00542302	0.0392943	0.0308749
GO:0031977	thylakoid lumen	67/16238	198/63668	0.00542302	0.0392943	0.0308749
GO:0004072	aspartate kinase activity	12/16238	23/63668	0.00552585	0.0398409	0.0313043
GO:0009071	serine family amino acid catabolic process	12/16238	23/63668	0.00552585	0.0398409	0.0313043
GO:0019202	amino acid kinase activity	12/16238	23/63668	0.00552585	0.0398409	0.0313043
GO:0001653	peptide receptor activity	17/16238	37/63668	0.00562617	0.0402978	0.0316633
GO:0008271	secondary active sulfate transmembrane transporter activity	17/16238	37/63668	0.00562617	0.0402978	0.0316633
GO:0015116	sulfate transmembrane transporter activity	17/16238	37/63668	0.00562617	0.0402978	0.0316633
GO:0042304	regulation of fatty acid biosynthetic process	17/16238	37/63668	0.00562617	0.0402978	0.0316633
GO:0009626	plant-type hypersensitive response	66/16238	195/63668	0.00571055	0.0408087	0.0320647
GO:0031490	chromatin DNA binding	26/16238	64/63668	0.00572556	0.0408087	0.0320647
GO:0046164	alcohol catabolic process	26/16238	64/63668	0.00572556	0.0408087	0.0320647
GO:0031300	intrinsic component of organelle membrane	103/16238	323/63668	0.00580201	0.0412861	0.0324398
GO:0140142	nucleocytoplasmic carrier activity	19/16238	43/63668	0.00594218	0.0422146	0.0331694
GO:0080186	developmental vegetative growth	23/16238	55/63668	0.005992	0.0424605	0.0333627
GO:0003755	peptidyl-prolyl cis-trans isomerase activity	65/16238	192/63668	0.00601371	0.0424605	0.0333627
GO:0008170	N-methyltransferase activity	65/16238	192/63668	0.00601371	0.0424605	0.0333627
GO:0033612	receptor serine/threonine kinase binding	20/16238	46/63668	0.00601573	0.0424605	0.0333627
GO:0033866	nucleoside bisphosphate biosynthetic process	41/16238	112/63668	0.00606328	0.0425894	0.0334639
GO:0034030	ribonucleoside bisphosphate biosynthetic process	41/16238	112/63668	0.00606328	0.0425894	0.0334639
GO:0034033	purine nucleoside bisphosphate biosynthetic process	41/16238	112/63668	0.00606328	0.0425894	0.0334639
GO:0034050	programmed cell death induced by symbiont	69/16238	206/63668	0.00631063	0.0441299	0.0346743
GO:0042364	water-soluble vitamin biosynthetic process	69/16238	206/63668	0.00631063	0.0441299	0.0346743
GO:0051748	UTP-monosaccharide-1-phosphate uridylyltransferase activity	10/16238	18/63668	0.00631294	0.0441299	0.0346743
GO:0043161	proteasome-mediated ubiquitin-dependent protein catabolic process	64/16238	189/63668	0.00633337	0.0442018	0.0347309
GO:0032182	ubiquitin-like protein binding	47/16238	132/63668	0.0063675	0.0442983	0.0348067
GO:0043130	ubiquitin binding	47/16238	132/63668	0.0063675	0.0442983	0.0348067
GO:0008905	mannose-phosphate guanylyltransferase activity	8/16238	13/63668	0.00643757	0.0444386	0.0349169
GO:0010587	miRNA catabolic process	8/16238	13/63668	0.00643757	0.0444386	0.0349169
GO:0080146	L-cysteine desulfhydrase activity	8/16238	13/63668	0.00643757	0.0444386	0.0349169
GO:1990380	Lys48-specific deubiquitinase activity	8/16238	13/63668	0.00643757	0.0444386	0.0349169
GO:0006534	cysteine metabolic process	30/16238	77/63668	0.00644879	0.0444386	0.0349169
GO:0042558	pteridine-containing compound metabolic process	30/16238	77/63668	0.00644879	0.0444386	0.0349169
GO:0015078	proton transmembrane transporter activity	116/16238	370/63668	0.00653401	0.0449548	0.0353225
GO:0015299	solute:proton antiporter activity	43/16238	119/63668	0.00655912	0.0450565	0.0354024
GO:0080188	gene silencing by RNA-directed DNA methylation	39/16238	106/63668	0.00663792	0.0454547	0.0357152
GO:0140458	pre-transcriptional gene silencing by RNA	39/16238	106/63668	0.00663792	0.0454547	0.0357152
GO:0044403	biological process involved in symbiotic interaction	94/16238	293/63668	0.00673777	0.0459051	0.0360692
GO:0006305	DNA alkylation	52/16238	149/63668	0.00674043	0.0459051	0.0360692
GO:0006306	DNA methylation	52/16238	149/63668	0.00674043	0.0459051	0.0360692
GO:0046488	phosphatidylinositol metabolic process	98/16238	307/63668	0.0067458	0.0459051	0.0360692
GO:0070568	guanylyltransferase activity	14/16238	29/63668	0.00681549	0.0463071	0.0363851
GO:0030042	actin filament depolymerization	28/16238	71/63668	0.00686885	0.0465971	0.0366129
GO:0031968	organelle outer membrane	93/16238	290/63668	0.00708725	0.0478819	0.0376224
GO:0034440	lipid oxidation	48/16238	136/63668	0.0070889	0.0478819	0.0376224
GO:0010026	trichome differentiation	95/16238	297/63668	0.00709353	0.0478819	0.0376224
GO:0070507	regulation of microtubule cytoskeleton organization	33/16238	87/63668	0.00710215	0.0478819	0.0376224
GO:0005770	late endosome	41/16238	113/63668	0.00720934	0.0485295	0.0381313
GO:0004519	endonuclease activity	100/16238	315/63668	0.00743661	0.049965	0.0392592
GO:1905039	carboxylic acid transmembrane transport	47/16238	133/63668	0.00745202	0.049965	0.0392592
GO:0005460	UDP-glucose transmembrane transporter activity	11/16238	21/63668	0.00753714	0.049965	0.0392592
GO:0015804	neutral amino acid transport	11/16238	21/63668	0.00753714	0.049965	0.0392592
GO:0016211	ammonia ligase activity	11/16238	21/63668	0.00753714	0.049965	0.0392592
GO:0016880	acid-ammonia (or amide) ligase activity	11/16238	21/63668	0.00753714	0.049965	0.0392592
GO:0048015	phosphatidylinositol-mediated signaling	11/16238	21/63668	0.00753714	0.049965	0.0392592
GO:0080032	methyl jasmonate esterase activity	11/16238	21/63668	0.00753714	0.049965	0.0392592
GO:0090708	specification of plant organ axis polarity	11/16238	21/63668	0.00753714	0.049965	0.0392592
GO:1901562	response to paraquat	11/16238	21/63668	0.00753714	0.049965	0.0392592

## Sheet: Four sub-genomes
ID	Description	GeneRatio	BgRatio	pvalue	p.adjust	qvalue
Gene retention in four sub-genomes
GO:0009808	lignin metabolic process	214/25051	320/63668	1.9024e-23	8.59885e-20	6.1858e-20
GO:0009698	phenylpropanoid metabolic process	283/25051	468/63668	1.78242e-20	4.02827e-17	2.89784e-17
GO:0046271	phenylpropanoid catabolic process	108/25051	141/63668	2.27083e-19	2.56604e-16	1.84594e-16
GO:0046274	lignin catabolic process	108/25051	141/63668	2.27083e-19	2.56604e-16	1.84594e-16
GO:0009699	phenylpropanoid biosynthetic process	182/25051	279/63668	1.94814e-18	1.76112e-15	1.26691e-15
GO:0010383	cell wall polysaccharide metabolic process	263/25051	447/63668	5.63228e-17	4.24298e-14	3.0523e-14
GO:0009664	plant-type cell wall organization	273/25051	471/63668	2.12259e-16	1.34107e-13	9.64735e-14
GO:0016679	oxidoreductase activity, acting on diphenols and related substances as donors	118/25051	167/63668	2.37358e-16	1.34107e-13	9.64735e-14
GO:0042744	hydrogen peroxide catabolic process	268/25051	462/63668	3.45342e-16	1.73439e-13	1.24768e-13
GO:0044550	secondary metabolite biosynthetic process	282/25051	492/63668	5.04722e-16	2.28134e-13	1.64114e-13
GO:0009311	oligosaccharide metabolic process	170/25051	272/63668	9.67211e-15	3.91825e-12	2.81869e-12
GO:0005984	disaccharide metabolic process	152/25051	237/63668	1.04024e-14	3.91825e-12	2.81869e-12
GO:0016682	oxidoreductase activity, acting on diphenols and related substances as donors, oxygen as acceptor	110/25051	158/63668	1.25362e-14	4.35874e-12	3.13558e-12
GO:0046351	disaccharide biosynthetic process	101/25051	142/63668	1.63966e-14	5.29375e-12	3.8082e-12
GO:0009896	positive regulation of catabolic process	117/25051	172/63668	2.55453e-14	7.69764e-12	5.53749e-12
GO:0016052	carbohydrate catabolic process	237/25051	413/63668	8.61971e-14	2.43507e-11	1.75173e-11
GO:1905177	tracheary element differentiation	42/25051	46/63668	2.23182e-13	5.93401e-11	4.26878e-11
GO:0010410	hemicellulose metabolic process	204/25051	349/63668	3.92131e-13	9.84685e-11	7.08359e-11
GO:0031331	positive regulation of cellular catabolic process	108/25051	160/63668	5.40029e-13	1.2847e-10	9.24182e-11
GO:0006084	acetyl-CoA metabolic process	78/25051	106/63668	8.6427e-13	1.7476e-10	1.25718e-10
GO:0071467	cellular response to pH	33/25051	34/63668	8.89264e-13	1.7476e-10	1.25718e-10
GO:0071469	cellular response to alkaline pH	33/25051	34/63668	8.89264e-13	1.7476e-10	1.25718e-10
GO:1900067	regulation of cellular response to alkaline pH	33/25051	34/63668	8.89264e-13	1.7476e-10	1.25718e-10
GO:0022625	cytosolic large ribosomal subunit	201/25051	346/63668	1.30372e-12	2.45534e-10	1.76631e-10
GO:0047834	D-threo-aldose 1-dehydrogenase activity	98/25051	143/63668	1.53996e-12	2.78425e-10	2.00292e-10
GO:0052716	hydroquinone:oxygen oxidoreductase activity	82/25051	114/63668	1.75879e-12	3.05759e-10	2.19956e-10
GO:0009312	oligosaccharide biosynthetic process	109/25051	164/63668	1.97128e-12	3.30006e-10	2.37399e-10
GO:0005996	monosaccharide metabolic process	226/25051	401/63668	3.8223e-12	6.17029e-10	4.43876e-10
GO:0009510	plasmodesmatal desmotubule	31/25051	32/63668	5.42065e-12	8.44874e-10	6.07782e-10
GO:0098754	detoxification	206/25051	361/63668	7.04665e-12	1.0617e-09	7.63758e-10
GO:0051607	defense response to virus	116/25051	180/63668	8.6859e-12	1.22688e-09	8.8259e-10
GO:0140546	defense response to symbiont	116/25051	180/63668	8.6859e-12	1.22688e-09	8.8259e-10
GO:0009832	plant-type cell wall biogenesis	256/25051	468/63668	1.16194e-11	1.59151e-09	1.14489e-09
GO:0005985	sucrose metabolic process	90/25051	132/63668	1.91238e-11	2.38072e-09	1.71264e-09
GO:0009968	negative regulation of signal transduction	264/25051	487/63668	2.01556e-11	2.38072e-09	1.71264e-09
GO:0010648	negative regulation of cell communication	264/25051	487/63668	2.01556e-11	2.38072e-09	1.71264e-09
GO:0023057	negative regulation of signaling	264/25051	487/63668	2.01556e-11	2.38072e-09	1.71264e-09
GO:0043401	steroid hormone mediated signaling pathway	149/25051	247/63668	2.10684e-11	2.38072e-09	1.71264e-09
GO:0048545	response to steroid hormone	149/25051	247/63668	2.10684e-11	2.38072e-09	1.71264e-09
GO:0071383	cellular response to steroid hormone stimulus	149/25051	247/63668	2.10684e-11	2.38072e-09	1.71264e-09
GO:1900055	regulation of leaf senescence	115/25051	181/63668	4.07784e-11	4.49557e-09	3.234e-09
GO:0009615	response to virus	157/25051	265/63668	4.47185e-11	4.76406e-09	3.42715e-09
GO:0009809	lignin biosynthetic process	103/25051	158/63668	4.53218e-11	4.76406e-09	3.42715e-09
GO:0009742	brassinosteroid mediated signaling pathway	147/25051	245/63668	5.0068e-11	5.14335e-09	3.7e-09
GO:0080022	primary root development	76/25051	108/63668	6.43668e-11	6.46529e-09	4.65097e-09
GO:0048759	xylem vessel member cell differentiation	25/25051	25/63668	7.40356e-11	7.2748e-09	5.23332e-09
GO:0031225	anchored component of membrane	240/25051	441/63668	9.67545e-11	9.3049e-09	6.69372e-09
GO:0005982	starch metabolic process	149/25051	251/63668	1.12158e-10	1.05615e-08	7.59772e-09
GO:0035265	organ growth	76/25051	109/63668	1.30522e-10	1.19329e-08	8.58427e-09
GO:0009636	response to toxic substance	253/25051	470/63668	1.32002e-10	1.19329e-08	8.58427e-09
GO:0015934	large ribosomal subunit	226/25051	413/63668	1.70221e-10	1.50862e-08	1.08527e-08
GO:0005797	Golgi medial cisterna	123/25051	200/63668	1.97493e-10	1.71667e-08	1.23493e-08
GO:0042788	polysomal ribosome	227/25051	416/63668	2.20028e-10	1.87647e-08	1.34988e-08
GO:0046939	nucleotide phosphorylation	146/25051	248/63668	3.90257e-10	3.26659e-08	2.34991e-08
GO:0045548	phenylalanine ammonia-lyase activity	26/25051	27/63668	4.88405e-10	4.0138e-08	2.88743e-08
GO:0071367	cellular response to brassinosteroid stimulus	147/25051	251/63668	5.66545e-10	4.57283e-08	3.28958e-08
GO:0019203	carbohydrate phosphatase activity	88/25051	134/63668	6.45375e-10	5.11771e-08	3.68156e-08
GO:0071490	cellular response to far red light	28/25051	30/63668	7.53878e-10	5.87505e-08	4.22637e-08
GO:0010089	xylem development	93/25051	144/63668	8.09326e-10	6.20026e-08	4.46032e-08
GO:0009720	detection of hormone stimulus	30/25051	33/63668	9.03766e-10	6.68426e-08	4.8085e-08
GO:0009726	detection of endogenous stimulus	30/25051	33/63668	9.03766e-10	6.68426e-08	4.8085e-08
GO:0015980	energy derivation by oxidation of organic compounds	190/25051	342/63668	9.16868e-10	6.68426e-08	4.8085e-08
GO:0004805	trehalose-phosphatase activity	55/25051	74/63668	1.04958e-09	7.53031e-08	5.41712e-08
GO:0019318	hexose metabolic process	130/25051	218/63668	1.10048e-09	7.77217e-08	5.59111e-08
GO:0034097	response to cytokine	25/25051	26/63668	1.19711e-09	8.32452e-08	5.98846e-08
GO:0006090	pyruvate metabolic process	173/25051	308/63668	1.66325e-09	1.13907e-07	8.19423e-08
GO:0047517	1,4-beta-D-xylan synthase activity	27/25051	29/63668	1.79224e-09	1.20909e-07	8.69793e-08
GO:1900057	positive regulation of leaf senescence	50/25051	66/63668	1.95715e-09	1.28778e-07	9.264e-08
GO:0006165	nucleoside diphosphate phosphorylation	142/25051	244/63668	1.98026e-09	1.28778e-07	9.264e-08
GO:1900056	negative regulation of leaf senescence	54/25051	73/63668	1.99435e-09	1.28778e-07	9.264e-08
GO:0042887	amide transmembrane transporter activity	113/25051	186/63668	2.91305e-09	1.8545e-07	1.33408e-07
GO:0009060	aerobic respiration	130/25051	221/63668	3.69247e-09	2.29331e-07	1.64975e-07
GO:0006637	acyl-CoA metabolic process	78/25051	118/63668	3.77489e-09	2.29331e-07	1.64975e-07
GO:0035383	thioester metabolic process	78/25051	118/63668	3.77489e-09	2.29331e-07	1.64975e-07
GO:0071398	cellular response to fatty acid	185/25051	336/63668	3.85021e-09	2.29331e-07	1.64975e-07
GO:0035770	ribonucleoprotein granule	93/25051	147/63668	3.90674e-09	2.29331e-07	1.64975e-07
GO:0036464	cytoplasmic ribonucleoprotein granule	93/25051	147/63668	3.90674e-09	2.29331e-07	1.64975e-07
GO:0090332	stomatal closure	118/25051	197/63668	4.35142e-09	2.52159e-07	1.81397e-07
GO:1901505	carbohydrate derivative transmembrane transporter activity	139/25051	240/63668	4.4918e-09	2.56955e-07	1.84848e-07
GO:2000030	regulation of response to red or far red light	111/25051	183/63668	4.54788e-09	2.56955e-07	1.84848e-07
GO:0019336	phenol-containing compound catabolic process	37/25051	45/63668	4.62296e-09	2.57973e-07	1.85579e-07
GO:0005844	polysome	227/25051	427/63668	4.77709e-09	2.63323e-07	1.89428e-07
GO:0000932	P-body	84/25051	130/63668	5.02981e-09	2.73913e-07	1.97046e-07
GO:0009299	mRNA transcription	35/25051	42/63668	6.09586e-09	3.28016e-07	2.35967e-07
GO:0009640	photomorphogenesis	208/25051	387/63668	6.41704e-09	3.41236e-07	2.45477e-07
GO:0010117	photoprotection	44/25051	57/63668	6.65674e-09	3.49866e-07	2.51685e-07
GO:0004557	alpha-galactosidase activity	20/25051	20/63668	7.87188e-09	4.04328e-07	2.90864e-07
GO:0009511	plasmodesmatal endoplasmic reticulum	20/25051	20/63668	7.87188e-09	4.04328e-07	2.90864e-07
GO:0009834	plant-type secondary cell wall biogenesis	122/25051	207/63668	9.33902e-09	4.67789e-07	3.36516e-07
GO:0010395	rhamnogalacturonan I metabolic process	31/25051	36/63668	9.41787e-09	4.67789e-07	3.36516e-07
GO:0045338	farnesyl diphosphate metabolic process	31/25051	36/63668	9.41787e-09	4.67789e-07	3.36516e-07
GO:0010246	rhamnogalacturonan I biosynthetic process	25/25051	27/63668	1.00559e-08	4.89625e-07	3.52224e-07
GO:0042910	xenobiotic transmembrane transporter activity	117/25051	197/63668	1.00741e-08	4.89625e-07	3.52224e-07
GO:0009938	negative regulation of gibberellic acid mediated signaling pathway	39/25051	49/63668	1.03305e-08	4.93418e-07	3.54953e-07
GO:0006749	glutathione metabolic process	190/25051	350/63668	1.03705e-08	4.93418e-07	3.54953e-07
GO:0019200	carbohydrate kinase activity	94/25051	151/63668	1.06659e-08	5.02186e-07	3.6126e-07
GO:0006102	isocitrate metabolic process	27/25051	30/63668	1.11375e-08	5.13689e-07	3.69535e-07
GO:1902652	secondary alcohol metabolic process	27/25051	30/63668	1.11375e-08	5.13689e-07	3.69535e-07
GO:0009132	nucleoside diphosphate metabolic process	142/25051	249/63668	1.22784e-08	5.60588e-07	4.03273e-07
GO:0009624	response to nematode	182/25051	334/63668	1.44154e-08	6.48166e-07	4.66275e-07
GO:0009819	drought recovery	40/25051	51/63668	1.44834e-08	6.48166e-07	4.66275e-07
GO:0010099	regulation of photomorphogenesis	85/25051	134/63668	1.49113e-08	6.60777e-07	4.75347e-07
GO:0015297	antiporter activity	229/25051	436/63668	1.58589e-08	6.95942e-07	5.00644e-07
GO:0000290	deadenylation-dependent decapping of nuclear-transcribed mRNA	32/25051	38/63668	1.67554e-08	7.28214e-07	5.2386e-07
GO:0047334	diphosphate-fructose-6-phosphate 1-phosphotransferase activity	22/25051	23/63668	1.74686e-08	7.51984e-07	5.40959e-07
GO:0006096	glycolytic process	127/25051	219/63668	1.8244e-08	7.70683e-07	5.54411e-07
GO:0006757	ATP generation from ADP	127/25051	219/63668	1.8244e-08	7.70683e-07	5.54411e-07
GO:0003872	6-phosphofructokinase activity	54/25051	76/63668	2.12888e-08	8.90975e-07	6.40946e-07
GO:0016102	diterpenoid biosynthetic process	84/25051	133/63668	2.42274e-08	1.00466e-06	7.22729e-07
GO:0046244	salicylic acid catabolic process	26/25051	29/63668	2.55574e-08	1.04847e-06	7.54243e-07
GO:0009135	purine nucleoside diphosphate metabolic process	127/25051	220/63668	2.64437e-08	1.04847e-06	7.54243e-07
GO:0009179	purine ribonucleoside diphosphate metabolic process	127/25051	220/63668	2.64437e-08	1.04847e-06	7.54243e-07
GO:0009185	ribonucleoside diphosphate metabolic process	127/25051	220/63668	2.64437e-08	1.04847e-06	7.54243e-07
GO:0046031	ADP metabolic process	127/25051	220/63668	2.64437e-08	1.04847e-06	7.54243e-07
GO:0009867	jasmonic acid mediated signaling pathway	171/25051	313/63668	3.02772e-08	1.18722e-06	8.5406e-07
GO:0071395	cellular response to jasmonic acid stimulus	178/25051	328/63668	3.04686e-08	1.18722e-06	8.5406e-07
GO:1900458	negative regulation of brassinosteroid mediated signaling pathway	47/25051	64/63668	3.25524e-08	1.25758e-06	9.04673e-07
GO:0046620	regulation of organ growth	52/25051	73/63668	3.37709e-08	1.2936e-06	9.30582e-07
GO:0005992	trehalose biosynthetic process	58/25051	84/63668	3.43697e-08	1.30547e-06	9.39123e-07
GO:0140352	export from cell	243/25051	470/63668	3.52051e-08	1.32606e-06	9.53935e-07
GO:1900457	regulation of brassinosteroid mediated signaling pathway	61/25051	90/63668	4.527e-08	1.69108e-06	1.21652e-06
GO:0046777	protein autophosphorylation	150/25051	270/63668	5.01218e-08	1.82569e-06	1.31336e-06
GO:0004421	hydroxymethylglutaryl-CoA synthase activity	18/25051	18/63668	5.08932e-08	1.82569e-06	1.31336e-06
GO:0010142	farnesyl diphosphate biosynthetic process, mevalonate pathway	18/25051	18/63668	5.08932e-08	1.82569e-06	1.31336e-06
GO:0050072	m7G(5')pppN diphosphatase activity	18/25051	18/63668	5.08932e-08	1.82569e-06	1.31336e-06
GO:1902767	isoprenoid biosynthetic process via mevalonate	18/25051	18/63668	5.08932e-08	1.82569e-06	1.31336e-06
GO:0009727	detection of ethylene stimulus	23/25051	25/63668	5.58077e-08	1.98623e-06	1.42884e-06
GO:0008378	galactosyltransferase activity	77/25051	121/63668	5.69909e-08	2.01249e-06	1.44774e-06
GO:0030291	protein serine/threonine kinase inhibitor activity	32/25051	39/63668	5.78902e-08	2.0284e-06	1.45918e-06
GO:0046500	S-adenosylmethionine metabolic process	25/25051	28/63668	5.84327e-08	2.03166e-06	1.46153e-06
GO:0010191	mucilage metabolic process	85/25051	137/63668	6.5518e-08	2.26062e-06	1.62624e-06
GO:0050779	RNA destabilization	52/25051	74/63668	7.00451e-08	2.38048e-06	1.71246e-06
GO:0061157	mRNA destabilization	52/25051	74/63668	7.00451e-08	2.38048e-06	1.71246e-06
GO:0010411	xyloglucan metabolic process	115/25051	198/63668	7.42725e-08	2.50531e-06	1.80226e-06
GO:0006575	cellular modified amino acid metabolic process	236/25051	459/63668	9.86896e-08	3.28476e-06	2.36298e-06
GO:0042908	xenobiotic transport	99/25051	166/63668	9.88334e-08	3.28476e-06	2.36298e-06
GO:0015932	nucleobase-containing compound transmembrane transporter activity	117/25051	203/63668	1.02575e-07	3.38421e-06	2.43452e-06
GO:2000652	regulation of secondary cell wall biogenesis	45/25051	62/63668	1.1433e-07	3.74472e-06	2.69386e-06
GO:0009051	pentose-phosphate shunt, oxidative branch	26/25051	30/63668	1.19287e-07	3.87896e-06	2.79043e-06
GO:0008443	phosphofructokinase activity	58/25051	86/63668	1.2613e-07	4.07221e-06	2.92945e-06
GO:0046337	phosphatidylethanolamine metabolic process	17/25051	17/63668	1.294e-07	4.14815e-06	2.98408e-06
GO:0016405	CoA-ligase activity	59/25051	88/63668	1.35726e-07	4.32028e-06	3.10791e-06
GO:0002213	defense response to insect	75/25051	119/63668	1.5085e-07	4.76813e-06	3.43008e-06
GO:1990961	xenobiotic detoxification by transmembrane export across the plasma membrane	97/25051	163/63668	1.53129e-07	4.80654e-06	3.45771e-06
GO:0010114	response to red light	143/25051	259/63668	1.6735e-07	5.21669e-06	3.75276e-06
GO:0015103	inorganic anion transmembrane transporter activity	177/25051	332/63668	1.69851e-07	5.25841e-06	3.78277e-06
GO:0009411	response to UV	204/25051	391/63668	1.76487e-07	5.42666e-06	3.90381e-06
GO:0009741	response to brassinosteroid	192/25051	365/63668	1.87844e-07	5.73166e-06	4.12322e-06
GO:0005372	water transmembrane transporter activity	39/25051	52/63668	1.88942e-07	5.73166e-06	4.12322e-06
GO:0045333	cellular respiration	161/25051	298/63668	1.965e-07	5.9212e-06	4.25956e-06
GO:0010119	regulation of stomatal movement	179/25051	337/63668	2.02778e-07	6.06992e-06	4.36655e-06
GO:0045337	farnesyl diphosphate biosynthetic process	27/25051	32/63668	2.13657e-07	6.31197e-06	4.54068e-06
GO:0080116	glucuronoxylan glucuronosyltransferase activity	27/25051	32/63668	2.13657e-07	6.31197e-06	4.54068e-06
GO:0043487	regulation of RNA stability	70/25051	110/63668	2.24219e-07	6.58097e-06	4.73419e-06
GO:0006972	hyperosmotic response	142/25051	258/63668	2.36904e-07	6.90843e-06	4.96976e-06
GO:0032876	negative regulation of DNA endoreduplication	30/25051	37/63668	2.5306e-07	7.33224e-06	5.27464e-06
GO:1905582	response to mannose	25/25051	29/63668	2.63903e-07	7.59772e-06	5.46562e-06
GO:0042538	hyperosmotic salinity response	128/25051	229/63668	2.90796e-07	8.31897e-06	5.98447e-06
GO:0047325	inositol tetrakisphosphate 1-kinase activity	21/25051	23/63668	3.05798e-07	8.47981e-06	6.10017e-06
GO:0051766	inositol trisphosphate kinase activity	21/25051	23/63668	3.05798e-07	8.47981e-06	6.10017e-06
GO:0052725	inositol-1,3,4-trisphosphate 6-kinase activity	21/25051	23/63668	3.05798e-07	8.47981e-06	6.10017e-06
GO:0052726	inositol-1,3,4-trisphosphate 5-kinase activity	21/25051	23/63668	3.05798e-07	8.47981e-06	6.10017e-06
GO:2000036	regulation of stem cell population maintenance	21/25051	23/63668	3.05798e-07	8.47981e-06	6.10017e-06
GO:0033946	xyloglucan-specific endo-beta-1,4-glucanase activity	16/25051	16/63668	3.29003e-07	9.03895e-06	6.5024e-06
GO:0010214	seed coat development	99/25051	169/63668	3.29962e-07	9.03895e-06	6.5024e-06
GO:0010218	response to far red light	111/25051	194/63668	3.5719e-07	9.72589e-06	6.99657e-06
GO:0016878	acid-thiol ligase activity	56/25051	84/63668	3.74611e-07	1.01392e-05	7.29387e-06
GO:0010192	mucilage biosynthetic process	71/25051	113/63668	3.80466e-07	1.02363e-05	7.36377e-06
GO:1904680	peptide transmembrane transporter activity	76/25051	123/63668	4.03252e-07	1.07852e-05	7.75862e-06
GO:0010051	xylem and phloem pattern formation	143/25051	262/63668	4.16514e-07	1.10744e-05	7.96663e-06
GO:0140115	export across plasma membrane	135/25051	245/63668	4.23121e-07	1.11843e-05	8.04569e-06
GO:0051348	negative regulation of transferase activity	35/25051	46/63668	4.43979e-07	1.16674e-05	8.39322e-06
GO:0010043	response to zinc ion	124/25051	222/63668	4.64201e-07	1.21282e-05	8.72477e-06
GO:0004860	protein kinase inhibitor activity	32/25051	41/63668	5.07734e-07	1.31894e-05	9.48814e-06
GO:1901264	carbohydrate derivative transport	119/25051	212/63668	5.52662e-07	1.42745e-05	1.02687e-05
GO:0004467	long-chain fatty acid-CoA ligase activity	36/25051	48/63668	5.61428e-07	1.44185e-05	1.03723e-05
GO:0010178	IAA-amino acid conjugate hydrolase activity	18/25051	19/63668	6.06686e-07	1.54928e-05	1.11451e-05
GO:0019900	kinase binding	180/25051	344/63668	6.98644e-07	1.77409e-05	1.27623e-05
GO:0004312	fatty acid synthase activity	48/25051	70/63668	7.0994e-07	1.78772e-05	1.28604e-05
GO:0050062	long-chain-fatty-acyl-CoA reductase activity	20/25051	22/63668	7.11922e-07	1.78772e-05	1.28604e-05
GO:0051291	protein heterooligomerization	30/25051	38/63668	7.46903e-07	1.86519e-05	1.34178e-05
GO:1903338	regulation of cell wall organization or biogenesis	59/25051	91/63668	7.78125e-07	1.93249e-05	1.39018e-05
GO:0033353	S-adenosylmethionine cycle	15/25051	15/63668	8.36476e-07	2.03273e-05	1.46229e-05
GO:0051723	protein methylesterase activity	15/25051	15/63668	8.36476e-07	2.03273e-05	1.46229e-05
GO:1901406	positive regulation of tetrapyrrole catabolic process	15/25051	15/63668	8.36476e-07	2.03273e-05	1.46229e-05
GO:1903648	positive regulation of chlorophyll catabolic process	15/25051	15/63668	8.36476e-07	2.03273e-05	1.46229e-05
GO:0000295	adenine nucleotide transmembrane transporter activity	34/25051	45/63668	8.64803e-07	2.0468e-05	1.47242e-05
GO:0016417	S-acyltransferase activity	34/25051	45/63668	8.64803e-07	2.0468e-05	1.47242e-05
GO:0042126	nitrate metabolic process	34/25051	45/63668	8.64803e-07	2.0468e-05	1.47242e-05
GO:0042128	nitrate assimilation	34/25051	45/63668	8.64803e-07	2.0468e-05	1.47242e-05
GO:0010393	galacturonan metabolic process	105/25051	184/63668	8.64908e-07	2.0468e-05	1.47242e-05
GO:0044275	cellular carbohydrate catabolic process	64/25051	101/63668	9.07426e-07	2.13623e-05	1.53675e-05
GO:0005986	sucrose biosynthetic process	39/25051	54/63668	9.86929e-07	2.31136e-05	1.66273e-05
GO:0048598	embryonic morphogenesis	74/25051	121/63668	1.00789e-06	2.34827e-05	1.68929e-05
GO:0010200	response to chitin	180/25051	346/63668	1.14132e-06	2.64552e-05	1.90312e-05
GO:0006085	acetyl-CoA biosynthetic process	47/25051	69/63668	1.24815e-06	2.87839e-05	2.07065e-05
GO:0051241	negative regulation of multicellular organismal process	210/25051	413/63668	1.3325e-06	3.0573e-05	2.19935e-05
GO:0051082	unfolded protein binding	136/25051	251/63668	1.34189e-06	3.06331e-05	2.20367e-05
GO:0043488	regulation of mRNA stability	61/25051	96/63668	1.41358e-06	3.20755e-05	2.30743e-05
GO:0006739	NADP metabolic process	84/25051	142/63668	1.41927e-06	3.20755e-05	2.30743e-05
GO:0080170	hydrogen peroxide transmembrane transport	17/25051	18/63668	1.46402e-06	3.29222e-05	2.36835e-05
GO:0015217	ADP transmembrane transporter activity	29/25051	37/63668	1.5089e-06	3.37636e-05	2.42887e-05
GO:0004332	fructose-bisphosphate aldolase activity	21/25051	24/63668	1.53036e-06	3.39398e-05	2.44155e-05
GO:0006457	protein folding	241/25051	483/63668	1.5318e-06	3.39398e-05	2.44155e-05
GO:0009407	toxin catabolic process	37/25051	51/63668	1.56242e-06	3.42823e-05	2.46618e-05
GO:0080001	mucilage extrusion from seed coat	37/25051	51/63668	1.56242e-06	3.42823e-05	2.46618e-05
GO:0015698	inorganic anion transport	168/25051	321/63668	1.57515e-06	3.43945e-05	2.47426e-05
GO:0004448	isocitrate dehydrogenase activity	19/25051	21/63668	1.65065e-06	3.55284e-05	2.55582e-05
GO:0010018	far-red light signaling pathway	19/25051	21/63668	1.65065e-06	3.55284e-05	2.55582e-05
GO:0051303	establishment of chromosome localization	19/25051	21/63668	1.65065e-06	3.55284e-05	2.55582e-05
GO:1902911	protein kinase complex	33/25051	44/63668	1.67339e-06	3.58471e-05	2.57875e-05
GO:0004721	phosphoprotein phosphatase activity	174/25051	335/63668	1.93405e-06	4.12355e-05	2.96638e-05
GO:0016160	amylase activity	45/25051	66/63668	2.00926e-06	4.23008e-05	3.04302e-05
GO:0006469	negative regulation of protein kinase activity	30/25051	39/63668	2.0121e-06	4.23008e-05	3.04302e-05
GO:0033673	negative regulation of kinase activity	30/25051	39/63668	2.0121e-06	4.23008e-05	3.04302e-05
GO:0015144	carbohydrate transmembrane transporter activity	100/25051	176/63668	2.0304e-06	4.2488e-05	3.05649e-05
GO:0044038	cell wall macromolecule biosynthetic process	125/25051	229/63668	2.12235e-06	4.38037e-05	3.15113e-05
GO:0070589	cellular component macromolecule biosynthetic process	125/25051	229/63668	2.12235e-06	4.38037e-05	3.15113e-05
GO:0070592	cell wall polysaccharide biosynthetic process	125/25051	229/63668	2.12235e-06	4.38037e-05	3.15113e-05
GO:1901403	positive regulation of tetrapyrrole metabolic process	27/25051	34/63668	2.21237e-06	4.54541e-05	3.26986e-05
GO:0042435	indole-containing compound biosynthetic process	105/25051	187/63668	2.42386e-06	4.9574e-05	3.56624e-05
GO:0009625	response to insect	66/25051	107/63668	2.47774e-06	4.97619e-05	3.57975e-05
GO:0016759	cellulose synthase activity	70/25051	115/63668	2.48955e-06	4.97619e-05	3.57975e-05
GO:0016760	cellulose synthase (UDP-forming) activity	70/25051	115/63668	2.48955e-06	4.97619e-05	3.57975e-05
GO:0035673	oligopeptide transmembrane transporter activity	70/25051	115/63668	2.48955e-06	4.97619e-05	3.57975e-05
GO:0045489	pectin biosynthetic process	68/25051	111/63668	2.49283e-06	4.97619e-05	3.57975e-05
GO:0034284	response to monosaccharide	141/25051	264/63668	2.50316e-06	4.97619e-05	3.57975e-05
GO:0016126	sterol biosynthetic process	48/25051	72/63668	2.51011e-06	4.97619e-05	3.57975e-05
GO:0009705	plant-type vacuole membrane	183/25051	356/63668	2.53903e-06	5.01154e-05	3.60518e-05
GO:0046621	negative regulation of organ growth	31/25051	41/63668	2.58389e-06	5.07791e-05	3.65293e-05
GO:0008643	carbohydrate transport	111/25051	200/63668	2.70572e-06	5.29432e-05	3.8086e-05
GO:0090697	post-embryonic plant organ morphogenesis	204/25051	403/63668	2.75221e-06	5.33358e-05	3.83685e-05
GO:0015866	ADP transport	22/25051	26/63668	2.76838e-06	5.33358e-05	3.83685e-05
GO:0048480	stigma development	22/25051	26/63668	2.76838e-06	5.33358e-05	3.83685e-05
GO:0010311	lateral root formation	89/25051	154/63668	2.77299e-06	5.33358e-05	3.83685e-05
GO:0010647	positive regulation of cell communication	150/25051	284/63668	2.82873e-06	5.41773e-05	3.89739e-05
GO:0016832	aldehyde-lyase activity	42/25051	61/63668	2.95372e-06	5.61164e-05	4.03688e-05
GO:0048826	cotyledon morphogenesis	51/25051	78/63668	2.9548e-06	5.61164e-05	4.03688e-05
GO:0009746	response to hexose	137/25051	256/63668	2.99177e-06	5.65808e-05	4.07029e-05
GO:0080167	response to karrikin	223/25051	446/63668	3.04181e-06	5.72874e-05	4.12112e-05
GO:0007569	cell aging	25/25051	31/63668	3.18062e-06	5.9653e-05	4.2913e-05
GO:0022821	potassium ion antiporter activity	32/25051	43/63668	3.21559e-06	6.00598e-05	4.32056e-05
GO:0005342	organic acid transmembrane transporter activity	135/25051	252/63668	3.26944e-06	6.0565e-05	4.3569e-05
GO:0046943	carboxylic acid transmembrane transporter activity	135/25051	252/63668	3.26944e-06	6.0565e-05	4.3569e-05
GO:1903313	positive regulation of mRNA metabolic process	54/25051	84/63668	3.32182e-06	6.12842e-05	4.40864e-05
GO:0110154	RNA decapping	37/25051	52/63668	3.3581e-06	6.14518e-05	4.4207e-05
GO:0110156	methylguanosine-cap decapping	37/25051	52/63668	3.3581e-06	6.14518e-05	4.4207e-05
GO:0009308	amine metabolic process	177/25051	344/63668	3.39597e-06	6.18942e-05	4.45252e-05
GO:0055074	calcium ion homeostasis	55/25051	86/63668	3.42486e-06	6.21701e-05	4.47237e-05
GO:0010210	IAA-Phe conjugate hydrolase activity	16/25051	17/63668	3.52264e-06	6.34356e-05	4.56341e-05
GO:0010211	IAA-Leu conjugate hydrolase activity	16/25051	17/63668	3.52264e-06	6.34356e-05	4.56341e-05
GO:0016762	xyloglucan:xyloglucosyl transferase activity	76/25051	128/63668	3.61965e-06	6.49238e-05	4.67046e-05
GO:0000288	nuclear-transcribed mRNA catabolic process, deadenylation-dependent decay	45/25051	67/63668	3.78491e-06	6.75358e-05	4.85836e-05
GO:0015749	monosaccharide transmembrane transport	72/25051	120/63668	3.80202e-06	6.75358e-05	4.85836e-05
GO:0009927	histidine phosphotransfer kinase activity	18/25051	20/63668	3.81009e-06	6.75358e-05	4.85836e-05
GO:0019566	arabinose metabolic process	33/25051	45/63668	3.89701e-06	6.88066e-05	4.94978e-05
GO:0005347	ATP transmembrane transporter activity	29/25051	38/63668	3.96424e-06	6.97213e-05	5.01558e-05
GO:0035384	thioester biosynthetic process	47/25051	71/63668	4.29462e-06	7.46604e-05	5.37089e-05
GO:0048640	negative regulation of developmental growth	47/25051	71/63668	4.29462e-06	7.46604e-05	5.37089e-05
GO:0071616	acyl-CoA biosynthetic process	47/25051	71/63668	4.29462e-06	7.46604e-05	5.37089e-05
GO:0032957	inositol trisphosphate metabolic process	26/25051	33/63668	4.49729e-06	7.76572e-05	5.58647e-05
GO:0015931	nucleobase-containing compound transport	151/25051	288/63668	4.50137e-06	7.76572e-05	5.58647e-05
GO:0046912	acyltransferase, acyl groups converted into alkyl on transfer	34/25051	47/63668	4.61719e-06	7.93524e-05	5.70842e-05
GO:0004089	carbonate dehydratase activity	30/25051	40/63668	5.00604e-06	8.5386e-05	6.14246e-05
GO:1901683	arsenate ion transmembrane transporter activity	30/25051	40/63668	5.00604e-06	8.5386e-05	6.14246e-05
GO:0042593	glucose homeostasis	51/25051	79/63668	5.15039e-06	8.75179e-05	6.29583e-05
GO:0098656	anion transmembrane transport	168/25051	326/63668	5.25203e-06	8.8866e-05	6.3928e-05
GO:0006086	acetyl-CoA biosynthetic process from pyruvate	35/25051	49/63668	5.36489e-06	8.8866e-05	6.3928e-05
GO:0003831	beta-N-acetylglucosaminylglycopeptide beta-1,4-galactosyltransferase activity	13/25051	13/63668	5.40667e-06	8.8866e-05	6.3928e-05
GO:0004766	spermidine synthase activity	13/25051	13/63668	5.40667e-06	8.8866e-05	6.3928e-05
GO:0016768	spermine synthase activity	13/25051	13/63668	5.40667e-06	8.8866e-05	6.3928e-05
GO:0042807	central vacuole	13/25051	13/63668	5.40667e-06	8.8866e-05	6.3928e-05
GO:1901745	prephenate(2-) metabolic process	13/25051	13/63668	5.40667e-06	8.8866e-05	6.3928e-05
GO:1901747	prephenate(2-) biosynthetic process	13/25051	13/63668	5.40667e-06	8.8866e-05	6.3928e-05
GO:1902459	positive regulation of stem cell population maintenance	13/25051	13/63668	5.40667e-06	8.8866e-05	6.3928e-05
GO:1901618	organic hydroxy compound transmembrane transporter activity	42/25051	62/63668	5.66948e-06	9.2848e-05	6.67926e-05
GO:0045491	xylan metabolic process	89/25051	156/63668	5.7318e-06	9.35298e-05	6.72831e-05
GO:0032269	negative regulation of cellular protein metabolic process	134/25051	252/63668	5.88957e-06	9.54153e-05	6.86395e-05
GO:0051248	negative regulation of protein metabolic process	134/25051	252/63668	5.88957e-06	9.54153e-05	6.86395e-05
GO:0046034	ATP metabolic process	188/25051	371/63668	6.0409e-06	9.75173e-05	7.01516e-05
GO:0004568	chitinase activity	43/25051	64/63668	6.10634e-06	9.78746e-05	7.04086e-05
GO:2001057	reactive nitrogen species metabolic process	43/25051	64/63668	6.10634e-06	9.78746e-05	7.04086e-05
GO:0015645	fatty acid ligase activity	36/25051	51/63668	6.1291e-06	9.78923e-05	7.04214e-05
GO:0009696	salicylic acid metabolic process	63/25051	103/63668	6.18617e-06	9.8456e-05	7.08269e-05
GO:0031408	oxylipin biosynthetic process	24/25051	30/63668	6.56489e-06	0.000103913	7.47527e-05
GO:0010102	lateral root morphogenesis	112/25051	205/63668	6.57504e-06	0.000103913	7.47527e-05
GO:0018958	phenol-containing compound metabolic process	93/25051	165/63668	7.13784e-06	0.000112256	8.07543e-05
GO:0034219	carbohydrate transmembrane transport	81/25051	140/63668	7.1526e-06	0.000112256	8.07543e-05
GO:0010187	negative regulation of seed germination	46/25051	70/63668	7.2991e-06	0.000114159	8.21232e-05
GO:0009268	response to pH	49/25051	76/63668	8.27038e-06	0.000128146	9.21853e-05
GO:0098876	vesicle-mediated transport to the plasma membrane	39/25051	57/63668	8.41992e-06	0.000128146	9.21853e-05
GO:0002215	defense response to nematode	15/25051	16/63668	8.44857e-06	0.000128146	9.21853e-05
GO:0015858	nucleoside transport	15/25051	16/63668	8.44857e-06	0.000128146	9.21853e-05
GO:0032000	positive regulation of fatty acid beta-oxidation	15/25051	16/63668	8.44857e-06	0.000128146	9.21853e-05
GO:0046321	positive regulation of fatty acid oxidation	15/25051	16/63668	8.44857e-06	0.000128146	9.21853e-05
GO:0050996	positive regulation of lipid catabolic process	15/25051	16/63668	8.44857e-06	0.000128146	9.21853e-05
GO:0070026	nitric oxide binding	15/25051	16/63668	8.44857e-06	0.000128146	9.21853e-05
GO:1901642	nucleoside transmembrane transport	15/25051	16/63668	8.44857e-06	0.000128146	9.21853e-05
GO:1903311	regulation of mRNA metabolic process	73/25051	124/63668	8.53493e-06	0.000128654	9.25508e-05
GO:0001678	cellular glucose homeostasis	50/25051	78/63668	8.53928e-06	0.000128654	9.25508e-05
GO:0034250	positive regulation of cellular amide metabolic process	33/25051	46/63668	8.56747e-06	0.000128654	9.25508e-05
GO:1904659	glucose transmembrane transport	17/25051	19/63668	8.75135e-06	0.000130981	9.42242e-05
GO:0061014	positive regulation of mRNA catabolic process	52/25051	82/63668	8.99263e-06	0.000134047	9.64302e-05
GO:0009759	indole glucosinolate biosynthetic process	25/25051	32/63668	9.07486e-06	0.000134047	9.64302e-05
GO:0010036	response to boron-containing substance	25/25051	32/63668	9.07486e-06	0.000134047	9.64302e-05
GO:0080029	cellular response to boron-containing substance levels	25/25051	32/63668	9.07486e-06	0.000134047	9.64302e-05
GO:0009404	toxin metabolic process	68/25051	114/63668	9.23771e-06	0.000135566	9.75231e-05
GO:0015020	glucuronosyltransferase activity	68/25051	114/63668	9.23771e-06	0.000135566	9.75231e-05
GO:0042577	lipid phosphatase activity	22/25051	27/63668	9.35317e-06	0.000136817	9.84225e-05
GO:0032875	regulation of DNA endoreduplication	55/25051	88/63668	9.46579e-06	0.000138017	9.92863e-05
GO:0009757	hexose mediated signaling	29/25051	39/63668	9.62546e-06	0.000138642	9.97361e-05
GO:0010255	glucose mediated signaling pathway	29/25051	39/63668	9.62546e-06	0.000138642	9.97361e-05
GO:0045727	positive regulation of translation	29/25051	39/63668	9.62546e-06	0.000138642	9.97361e-05
GO:0010374	stomatal complex development	94/25051	168/63668	9.63136e-06	0.000138642	9.97361e-05
GO:0052546	cell wall pectin metabolic process	63/25051	104/63668	9.67736e-06	0.00013886	9.98925e-05
GO:0005991	trehalose metabolic process	58/25051	94/63668	9.70791e-06	0.00013886	9.98925e-05
GO:0051119	sugar transmembrane transporter activity	80/25051	139/63668	1.06331e-05	0.000151614	0.000109067
GO:0016101	diterpenoid metabolic process	91/25051	162/63668	1.07024e-05	0.000152123	0.000109434
GO:1900426	positive regulation of defense response to bacterium	43/25051	65/63668	1.11719e-05	0.000158298	0.000113876
GO:0031407	oxylipin metabolic process	30/25051	41/63668	1.16119e-05	0.000164018	0.000117991
GO:0072507	divalent inorganic cation homeostasis	97/25051	175/63668	1.19188e-05	0.000167828	0.000120732
GO:0015867	ATP transport	20/25051	24/63668	1.28647e-05	0.000180026	0.000129507
GO:0080088	spermidine hydroxycinnamate conjugate biosynthetic process	20/25051	24/63668	1.28647e-05	0.000180026	0.000129507
GO:0046898	response to cycloheximide	23/25051	29/63668	1.3449e-05	0.000187621	0.00013497
GO:0004449	isocitrate dehydrogenase (NAD+) activity	12/25051	12/63668	1.37452e-05	0.000188268	0.000135436
GO:0005464	UDP-xylose transmembrane transporter activity	12/25051	12/63668	1.37452e-05	0.000188268	0.000135436
GO:0008426	protein kinase C inhibitor activity	12/25051	12/63668	1.37452e-05	0.000188268	0.000135436
GO:0015790	UDP-xylose transmembrane transport	12/25051	12/63668	1.37452e-05	0.000188268	0.000135436
GO:0017057	6-phosphogluconolactonase activity	12/25051	12/63668	1.37452e-05	0.000188268	0.000135436
GO:0042301	phosphate ion binding	12/25051	12/63668	1.37452e-05	0.000188268	0.000135436
GO:0008514	organic anion transmembrane transporter activity	143/25051	275/63668	1.38291e-05	0.000188845	0.00013585
GO:0003680	minor groove of adenine-thymine-rich DNA binding	50/25051	79/63668	1.43822e-05	0.000195806	0.000140858
GO:0071901	negative regulation of protein serine/threonine kinase activity	27/25051	36/63668	1.50424e-05	0.000204179	0.000146882
GO:0031400	negative regulation of protein modification process	60/25051	99/63668	1.52817e-05	0.000206807	0.000148772
GO:0010540	basipetal auxin transport	56/25051	91/63668	1.53676e-05	0.000207348	0.000149161
GO:0010101	post-embryonic root morphogenesis	112/25051	208/63668	1.57557e-05	0.000211952	0.000152473
GO:0009965	leaf morphogenesis	175/25051	347/63668	1.75553e-05	0.000235459	0.000169384
GO:0051094	positive regulation of developmental process	229/25051	469/63668	1.81611e-05	0.000242865	0.000174711
GO:0004364	glutathione transferase activity	108/25051	200/63668	1.87597e-05	0.00025013	0.000179937
GO:0004021	L-alanine:2-oxoglutarate aminotransferase activity	21/25051	26/63668	1.9511e-05	0.000256366	0.000184424
GO:0010264	myo-inositol hexakisphosphate biosynthetic process	21/25051	26/63668	1.9511e-05	0.000256366	0.000184424
GO:0033517	myo-inositol hexakisphosphate metabolic process	21/25051	26/63668	1.9511e-05	0.000256366	0.000184424
GO:0047635	alanine-oxo-acid transaminase activity	21/25051	26/63668	1.9511e-05	0.000256366	0.000184424
GO:0051765	inositol tetrakisphosphate kinase activity	21/25051	26/63668	1.9511e-05	0.000256366	0.000184424
GO:0005337	nucleoside transmembrane transporter activity	34/25051	49/63668	1.99579e-05	0.000260722	0.000187557
GO:0071941	nitrogen cycle metabolic process	34/25051	49/63668	1.99579e-05	0.000260722	0.000187557
GO:0004106	chorismate mutase activity	14/25051	15/63668	2.01892e-05	0.000262983	0.000189183
GO:0033500	carbohydrate homeostasis	68/25051	116/63668	2.07592e-05	0.000269631	0.000193966
GO:0010037	response to carbon dioxide	35/25051	51/63668	2.19844e-05	0.000283104	0.000203658
GO:0016899	oxidoreductase activity, acting on the CH-OH group of donors, oxygen as acceptor	35/25051	51/63668	2.19844e-05	0.000283104	0.000203658
GO:0048446	petal morphogenesis	35/25051	51/63668	2.19844e-05	0.000283104	0.000203658
GO:0010224	response to UV-B	127/25051	242/63668	2.31277e-05	0.000296844	0.000213543
GO:0008865	fructokinase activity	25/25051	33/63668	2.33798e-05	0.000296844	0.000213543
GO:0009306	protein secretion	25/25051	33/63668	2.33798e-05	0.000296844	0.000213543
GO:0035592	establishment of protein localization to extracellular region	25/25051	33/63668	2.33798e-05	0.000296844	0.000213543
GO:0071692	protein localization to extracellular region	25/25051	33/63668	2.33798e-05	0.000296844	0.000213543
GO:0006022	aminoglycan metabolic process	36/25051	53/63668	2.39358e-05	0.000298867	0.000214998
GO:0006026	aminoglycan catabolic process	36/25051	53/63668	2.39358e-05	0.000298867	0.000214998
GO:0006030	chitin metabolic process	36/25051	53/63668	2.39358e-05	0.000298867	0.000214998
GO:0006032	chitin catabolic process	36/25051	53/63668	2.39358e-05	0.000298867	0.000214998
GO:0046348	amino sugar catabolic process	36/25051	53/63668	2.39358e-05	0.000298867	0.000214998
GO:1901072	glucosamine-containing compound catabolic process	36/25051	53/63668	2.39358e-05	0.000298867	0.000214998
GO:0016998	cell wall macromolecule catabolic process	53/25051	86/63668	2.42623e-05	0.000302109	0.00021733
GO:0008156	negative regulation of DNA replication	30/25051	42/63668	2.53063e-05	0.000313383	0.00022544
GO:2000104	negative regulation of DNA-dependent DNA replication	30/25051	42/63668	2.53063e-05	0.000313383	0.00022544
GO:1990069	stomatal opening	37/25051	55/63668	2.57933e-05	0.000318541	0.00022915
GO:0004564	beta-fructofuranosidase activity	22/25051	28/63668	2.73311e-05	0.000336054	0.000241749
GO:0008645	hexose transmembrane transport	19/25051	23/63668	2.74345e-05	0.000336054	0.000241749
GO:1902533	positive regulation of intracellular signal transduction	19/25051	23/63668	2.74345e-05	0.000336054	0.000241749
GO:0010166	wax metabolic process	83/25051	148/63668	2.76234e-05	0.000337453	0.000242756
GO:0043086	negative regulation of catalytic activity	82/25051	146/63668	2.86121e-05	0.00034859	0.000250767
GO:0016841	ammonia-lyase activity	26/25051	35/63668	2.89445e-05	0.000351691	0.000252998
GO:0035251	UDP-glucosyltransferase activity	189/25051	381/63668	2.94996e-05	0.000357476	0.000257159
GO:0070588	calcium ion transmembrane transport	41/25051	63/63668	3.20362e-05	0.000387175	0.000278525
GO:0045488	pectin metabolic process	95/25051	174/63668	3.26225e-05	0.00039321	0.000282865
GO:1902532	negative regulation of intracellular signal transduction	64/25051	109/63668	3.34038e-05	0.000398848	0.000286922
GO:0051259	protein complex oligomerization	101/25051	187/63668	3.38831e-05	0.000398848	0.000286922
GO:0003825	alpha,alpha-trehalose-phosphate synthase (UDP-forming) activity	27/25051	37/63668	3.47249e-05	0.000398848	0.000286922
GO:0050688	regulation of defense response to virus	27/25051	37/63668	3.47249e-05	0.000398848	0.000286922
GO:0004830	tryptophan-tRNA ligase activity	11/25051	11/63668	3.49433e-05	0.000398848	0.000286922
GO:0006436	tryptophanyl-tRNA aminoacylation	11/25051	11/63668	3.49433e-05	0.000398848	0.000286922
GO:0006522	alanine metabolic process	11/25051	11/63668	3.49433e-05	0.000398848	0.000286922
GO:0006524	alanine catabolic process	11/25051	11/63668	3.49433e-05	0.000398848	0.000286922
GO:0007080	mitotic metaphase plate congression	11/25051	11/63668	3.49433e-05	0.000398848	0.000286922
GO:0009078	pyruvate family amino acid metabolic process	11/25051	11/63668	3.49433e-05	0.000398848	0.000286922
GO:0009080	pyruvate family amino acid catabolic process	11/25051	11/63668	3.49433e-05	0.000398848	0.000286922
GO:0010289	homogalacturonan biosynthetic process	11/25051	11/63668	3.49433e-05	0.000398848	0.000286922
GO:0010541	acropetal auxin transport	11/25051	11/63668	3.49433e-05	0.000398848	0.000286922
GO:0015864	pyrimidine nucleoside transport	11/25051	11/63668	3.49433e-05	0.000398848	0.000286922
GO:0019481	L-alanine catabolic process, by transamination	11/25051	11/63668	3.49433e-05	0.000398848	0.000286922
GO:0032008	positive regulation of TOR signaling	11/25051	11/63668	3.49433e-05	0.000398848	0.000286922
GO:0042851	L-alanine metabolic process	11/25051	11/63668	3.49433e-05	0.000398848	0.000286922
GO:0042853	L-alanine catabolic process	11/25051	11/63668	3.49433e-05	0.000398848	0.000286922
GO:0051310	metaphase plate congression	11/25051	11/63668	3.49433e-05	0.000398848	0.000286922
GO:0051315	attachment of mitotic spindle microtubules to kinetochore	11/25051	11/63668	3.49433e-05	0.000398848	0.000286922
GO:0090059	protoxylem development	11/25051	11/63668	3.49433e-05	0.000398848	0.000286922
GO:0006493	protein O-linked glycosylation	33/25051	48/63668	3.55816e-05	0.000405111	0.000291427
GO:0004556	alpha-amylase activity	23/25051	30/63668	3.60681e-05	0.000409618	0.000294669
GO:0004345	glucose-6-phosphate dehydrogenase activity	17/25051	20/63668	3.67518e-05	0.000411184	0.000295796
GO:0048498	establishment of petal orientation	17/25051	20/63668	3.67518e-05	0.000411184	0.000295796
GO:0048559	establishment of floral organ orientation	17/25051	20/63668	3.67518e-05	0.000411184	0.000295796
GO:0048560	establishment of anatomical structure orientation	17/25051	20/63668	3.67518e-05	0.000411184	0.000295796
GO:0090428	perianth development	17/25051	20/63668	3.67518e-05	0.000411184	0.000295796
GO:0090707	establishment of plant organ orientation	17/25051	20/63668	3.67518e-05	0.000411184	0.000295796
GO:0010167	response to nitrate	57/25051	95/63668	3.73061e-05	0.000415028	0.000298561
GO:0008287	protein serine/threonine phosphatase complex	47/25051	75/63668	3.73709e-05	0.000415028	0.000298561
GO:1903293	phosphatase complex	47/25051	75/63668	3.73709e-05	0.000415028	0.000298561
GO:0009704	de-etiolation	50/25051	81/63668	3.83409e-05	0.000424757	0.00030556
GO:0005346	purine ribonucleotide transmembrane transporter activity	34/25051	50/63668	3.87738e-05	0.000428503	0.000308255
GO:0009309	amine biosynthetic process	72/25051	126/63668	3.96717e-05	0.000436093	0.000313715
GO:0042401	cellular biogenic amine biosynthetic process	72/25051	126/63668	3.96717e-05	0.000436093	0.000313715
GO:0010025	wax biosynthetic process	82/25051	147/63668	3.98465e-05	0.000436093	0.000313715
GO:0042023	DNA endoreduplication	82/25051	147/63668	3.98465e-05	0.000436093	0.000313715
GO:0009812	flavonoid metabolic process	126/25051	242/63668	3.99591e-05	0.000436268	0.000313841
GO:0042759	long-chain fatty acid biosynthetic process	20/25051	25/63668	4.03711e-05	0.000439704	0.000316313
GO:0009635	response to herbicide	35/25051	52/63668	4.17914e-05	0.00045408	0.000326654
GO:0004435	phosphatidylinositol phospholipase C activity	15/25051	17/63668	4.53931e-05	0.000491446	0.000353534
GO:0016297	acyl-[acyl-carrier-protein] hydrolase activity	24/25051	32/63668	4.54479e-05	0.000491446	0.000353534
GO:0046030	inositol trisphosphate phosphatase activity	13/25051	14/63668	4.80469e-05	0.00051831	0.00037286
GO:0015250	water channel activity	30/25051	43/63668	5.21511e-05	0.000561245	0.000403746
GO:0061013	regulation of mRNA catabolic process	61/25051	104/63668	5.27248e-05	0.000566072	0.000407218
GO:1901568	fatty acid derivative metabolic process	83/25051	150/63668	5.29401e-05	0.000567036	0.000407912
GO:0009749	response to glucose	125/25051	241/63668	5.34952e-05	0.000571627	0.000411215
GO:0048527	lateral root development	188/25051	382/63668	5.48687e-05	0.000581226	0.00041812
GO:0046373	L-arabinose metabolic process	21/25051	27/63668	5.50636e-05	0.000581226	0.00041812
GO:0090342	regulation of cell aging	21/25051	27/63668	5.50636e-05	0.000581226	0.00041812
GO:0047501	(+)-neomenthol dehydrogenase activity	25/25051	34/63668	5.52034e-05	0.000581226	0.00041812
GO:0047504	(-)-menthol dehydrogenase activity	25/25051	34/63668	5.52034e-05	0.000581226	0.00041812
GO:0009967	positive regulation of signal transduction	134/25051	261/63668	5.52252e-05	0.000581226	0.00041812
GO:0048768	root hair cell tip growth	41/25051	64/63668	5.52936e-05	0.000581226	0.00041812
GO:0031226	intrinsic component of plasma membrane	151/25051	299/63668	5.76941e-05	0.000598902	0.000430836
GO:0008970	phospholipase A1 activity	43/25051	68/63668	5.79288e-05	0.000598902	0.000430836
GO:0005987	sucrose catabolic process	18/25051	22/63668	5.80352e-05	0.000598902	0.000430836
GO:0008878	glucose-1-phosphate adenylyltransferase activity	18/25051	22/63668	5.80352e-05	0.000598902	0.000430836
GO:0080012	trihydroxyferuloyl spermidine O-methyltransferase activity	18/25051	22/63668	5.80352e-05	0.000598902	0.000430836
GO:0080076	caffeoyl CoA:S-adenosyl-L-methionine O-methyltransferase activity	18/25051	22/63668	5.80352e-05	0.000598902	0.000430836
GO:0080077	trihydroxyferuloyl spermidine:S-adenosyl-L-methionine O-methyltransferase activity	18/25051	22/63668	5.80352e-05	0.000598902	0.000430836
GO:0080078	tricaffeoyl spermidine:S-adenosyl-L-methionine O-methyltransferase activity	18/25051	22/63668	5.80352e-05	0.000598902	0.000430836
GO:0009641	shade avoidance	71/25051	125/63668	5.83374e-05	0.000599936	0.000431579
GO:0009926	auxin polar transport	155/25051	308/63668	5.84008e-05	0.000599936	0.000431579
GO:0048825	cotyledon development	80/25051	144/63668	5.94171e-05	0.000608992	0.000438094
GO:0006002	fructose 6-phosphate metabolic process	45/25051	72/63668	5.96882e-05	0.000610386	0.000439097
GO:0048441	petal development	46/25051	74/63668	6.02635e-05	0.000613493	0.000441332
GO:0048465	corolla development	46/25051	74/63668	6.02635e-05	0.000613493	0.000441332
GO:0042343	indole glucosinolate metabolic process	32/25051	47/63668	6.28953e-05	0.000638847	0.000459571
GO:0006576	cellular biogenic amine metabolic process	109/25051	207/63668	6.99434e-05	0.000708844	0.000509925
GO:0008519	ammonium transmembrane transporter activity	22/25051	29/63668	7.09606e-05	0.000714347	0.000513884
GO:0042493	response to drug	22/25051	29/63668	7.09606e-05	0.000714347	0.000513884
GO:0071249	cellular response to nitrate	22/25051	29/63668	7.09606e-05	0.000714347	0.000513884
GO:0009894	regulation of catabolic process	155/25051	309/63668	7.18841e-05	0.000722036	0.000519415
GO:0019375	galactolipid biosynthetic process	34/25051	51/63668	7.23527e-05	0.000725131	0.000521642
GO:1901570	fatty acid derivative biosynthetic process	82/25051	149/63668	7.53922e-05	0.000753922	0.000542353
GO:0008417	fucosyltransferase activity	35/25051	53/63668	7.65108e-05	0.000761737	0.000547975
GO:0010446	response to alkaline pH	35/25051	53/63668	7.65108e-05	0.000761737	0.000547975
GO:0015692	lead ion transport	16/25051	19/63668	7.99398e-05	0.000794127	0.000571276
GO:0019374	galactolipid metabolic process	38/25051	59/63668	8.65332e-05	0.000845299	0.000608087
GO:0023056	positive regulation of signaling	134/25051	263/63668	8.68702e-05	0.000845299	0.000608087
GO:0090329	regulation of DNA-dependent DNA replication	55/25051	93/63668	8.836e-05	0.000845299	0.000608087
GO:0000247	C-8 sterol isomerase activity	10/25051	10/63668	8.88312e-05	0.000845299	0.000608087
GO:0004366	glycerol-3-phosphate O-acyltransferase activity	10/25051	10/63668	8.88312e-05	0.000845299	0.000608087
GO:0004478	methionine adenosyltransferase activity	10/25051	10/63668	8.88312e-05	0.000845299	0.000608087
GO:0004793	threonine aldolase activity	10/25051	10/63668	8.88312e-05	0.000845299	0.000608087
GO:0006556	S-adenosylmethionine biosynthetic process	10/25051	10/63668	8.88312e-05	0.000845299	0.000608087
GO:0006567	threonine catabolic process	10/25051	10/63668	8.88312e-05	0.000845299	0.000608087
GO:0006580	ethanolamine metabolic process	10/25051	10/63668	8.88312e-05	0.000845299	0.000608087
GO:0008453	alanine-glyoxylate transaminase activity	10/25051	10/63668	8.88312e-05	0.000845299	0.000608087
GO:0010248	establishment or maintenance of transmembrane electrochemical gradient	10/25051	10/63668	8.88312e-05	0.000845299	0.000608087
GO:0018454	acetoacetyl-CoA reductase activity	10/25051	10/63668	8.88312e-05	0.000845299	0.000608087
GO:0045703	ketoreductase activity	10/25051	10/63668	8.88312e-05	0.000845299	0.000608087
GO:0046437	D-amino acid biosynthetic process	10/25051	10/63668	8.88312e-05	0.000845299	0.000608087
GO:0047750	cholestenol delta-isomerase activity	10/25051	10/63668	8.88312e-05	0.000845299	0.000608087
GO:0070179	D-serine biosynthetic process	10/25051	10/63668	8.88312e-05	0.000845299	0.000608087
GO:0070382	exocytic vesicle	10/25051	10/63668	8.88312e-05	0.000845299	0.000608087
GO:0090058	metaxylem development	10/25051	10/63668	8.88312e-05	0.000845299	0.000608087
GO:1900030	regulation of pectin biosynthetic process	10/25051	10/63668	8.88312e-05	0.000845299	0.000608087
GO:0010087	phloem or xylem histogenesis	170/25051	344/63668	9.18182e-05	0.000871887	0.000627215
GO:0071241	cellular response to inorganic substance	67/25051	118/63668	9.42414e-05	0.000886204	0.000637514
GO:0015114	phosphate ion transmembrane transporter activity	42/25051	67/63668	9.43062e-05	0.000886204	0.000637514
GO:0071326	cellular response to monosaccharide stimulus	42/25051	67/63668	9.43062e-05	0.000886204	0.000637514
GO:0071331	cellular response to hexose stimulus	42/25051	67/63668	9.43062e-05	0.000886204	0.000637514
GO:0071333	cellular response to glucose stimulus	42/25051	67/63668	9.43062e-05	0.000886204	0.000637514
GO:0015605	organophosphate ester transmembrane transporter activity	49/25051	81/63668	9.5461e-05	0.000895195	0.000643981
GO:0120114	Sm-like protein family complex	46/25051	75/63668	9.65759e-05	0.000903774	0.000650154
GO:0019208	phosphatase regulator activity	66/25051	116/63668	9.73127e-05	0.000908065	0.00065324
GO:0004190	aspartic-type endopeptidase activity	157/25051	315/63668	9.76371e-05	0.000908065	0.00065324
GO:0070001	aspartic-type peptidase activity	157/25051	315/63668	9.76371e-05	0.000908065	0.00065324
GO:0010441	guard cell development	14/25051	16/63668	0.000102373	0.000946272	0.000680725
GO:0010442	guard cell morphogenesis	14/25051	16/63668	0.000102373	0.000946272	0.000680725
GO:0033549	MAP kinase phosphatase activity	14/25051	16/63668	0.000102373	0.000946272	0.000680725
GO:0015145	monosaccharide transmembrane transporter activity	64/25051	112/63668	0.000103562	0.00095531	0.000687227
GO:0010011	auxin binding	20/25051	26/63668	0.000109904	0.00100357	0.000721946
GO:0010981	regulation of cell wall macromolecule metabolic process	20/25051	26/63668	0.000109904	0.00100357	0.000721946
GO:0035445	borate transmembrane transport	20/25051	26/63668	0.000109904	0.00100357	0.000721946
GO:0046713	borate transport	20/25051	26/63668	0.000109904	0.00100357	0.000721946
GO:0050691	regulation of defense response to virus by host	20/25051	26/63668	0.000109904	0.00100357	0.000721946
GO:0030134	COPII-coated ER to Golgi transport vesicle	31/25051	46/63668	0.000110183	0.00100409	0.000722315
GO:0004473	malate dehydrogenase (decarboxylating) (NADP+) activity	12/25051	13/63668	0.000113808	0.00101864	0.000732784
GO:0004742	dihydrolipoyllysine-residue acetyltransferase activity	12/25051	13/63668	0.000113808	0.00101864	0.000732784
GO:0009557	antipodal cell differentiation	12/25051	13/63668	0.000113808	0.00101864	0.000732784
GO:0015129	lactate transmembrane transporter activity	12/25051	13/63668	0.000113808	0.00101864	0.000732784
GO:0015727	lactate transport	12/25051	13/63668	0.000113808	0.00101864	0.000732784
GO:0016418	S-acetyltransferase activity	12/25051	13/63668	0.000113808	0.00101864	0.000732784
GO:0032153	cell division site	12/25051	13/63668	0.000113808	0.00101864	0.000732784
GO:0032586	protein storage vacuole membrane	12/25051	13/63668	0.000113808	0.00101864	0.000732784
GO:1900384	regulation of flavonol biosynthetic process	12/25051	13/63668	0.000113808	0.00101864	0.000732784
GO:0042537	benzene-containing compound metabolic process	86/25051	159/63668	0.000116145	0.0010375	0.000746352
GO:0006098	pentose-phosphate shunt	58/25051	100/63668	0.000122601	0.00109086	0.000784741
GO:0051156	glucose 6-phosphate metabolic process	58/25051	100/63668	0.000122601	0.00109086	0.000784741
GO:0006099	tricarboxylic acid cycle	56/25051	96/63668	0.000128756	0.00114338	0.000822517
GO:0015216	purine nucleotide transmembrane transporter activity	34/25051	52/63668	0.00013008	0.00115286	0.000829341
GO:0015215	nucleotide transmembrane transporter activity	35/25051	54/63668	0.000135275	0.00119656	0.000860775
GO:1902170	cellular response to reactive nitrogen species	26/25051	37/63668	0.000136862	0.00120823	0.000869173
GO:0044786	cell cycle DNA replication	82/25051	151/63668	0.000138188	0.00121584	0.000874645
GO:0072530	purine-containing compound transmembrane transport	21/25051	28/63668	0.000138261	0.00121584	0.000874645
GO:0035250	UDP-galactosyltransferase activity	36/25051	56/63668	0.000139755	0.00122659	0.000882377
GO:0004722	protein serine/threonine phosphatase activity	99/25051	188/63668	0.00014552	0.00127471	0.000916996
GO:0009250	glucan biosynthetic process	214/25051	447/63668	0.000145908	0.00127564	0.000917663
GO:0072350	tricarboxylic acid metabolic process	27/25051	39/63668	0.00015207	0.00131874	0.000948667
GO:0000159	protein phosphatase type 2A complex	41/25051	66/63668	0.000152297	0.00131874	0.000948667
GO:0005983	starch catabolic process	41/25051	66/63668	0.000152297	0.00131874	0.000948667
GO:0009251	glucan catabolic process	41/25051	66/63668	0.000152297	0.00131874	0.000948667
GO:0044247	cellular polysaccharide catabolic process	41/25051	66/63668	0.000152297	0.00131874	0.000948667
GO:1902531	regulation of intracellular signal transduction	98/25051	186/63668	0.000152597	0.00131881	0.00094872
GO:0005963	magnesium-dependent protein serine/threonine phosphatase complex	44/25051	72/63668	0.000153188	0.00131888	0.000948767
GO:0009937	regulation of gibberellic acid mediated signaling pathway	44/25051	72/63668	0.000153188	0.00131888	0.000948767
GO:0052325	cell wall pectin biosynthetic process	28/25051	41/63668	0.000166281	0.00142887	0.0010279
GO:0042409	caffeoyl-CoA O-methyltransferase activity	18/25051	23/63668	0.000168198	0.00143987	0.00103581
GO:0071836	nectar secretion	18/25051	23/63668	0.000168198	0.00143987	0.00103581
GO:0030243	cellulose metabolic process	124/25051	244/63668	0.000178351	0.0015239	0.00109626
GO:0005759	mitochondrial matrix	68/25051	122/63668	0.000179282	0.00152674	0.0010983
GO:1902456	regulation of stomatal opening	29/25051	43/63668	0.000179358	0.00152674	0.0010983
GO:0046658	anchored component of plasma membrane	110/25051	213/63668	0.000179806	0.00152767	0.00109897
GO:1901149	salicylic acid binding	66/25051	118/63668	0.000193178	0.00163821	0.00117849
GO:0031086	nuclear-transcribed mRNA catabolic process, deadenylation-independent decay	23/25051	32/63668	0.000195075	0.00164504	0.0011834
GO:0031087	deadenylation-independent decapping of nuclear-transcribed mRNA	23/25051	32/63668	0.000195075	0.00164504	0.0011834
GO:2000306	positive regulation of photomorphogenesis	23/25051	32/63668	0.000195075	0.00164504	0.0011834
GO:0019210	kinase inhibitor activity	32/25051	49/63668	0.000211108	0.00177362	0.0012759
GO:0034644	cellular response to UV	32/25051	49/63668	0.000211108	0.00177362	0.0012759
GO:0048359	mucilage metabolic process involved in seed coat development	51/25051	87/63668	0.000213316	0.00178885	0.00128685
GO:0015711	organic anion transport	160/25051	326/63668	0.00022001	0.00184157	0.00132478
GO:0009313	oligosaccharide catabolic process	24/25051	34/63668	0.000222119	0.00185578	0.001335
GO:0010152	pollen maturation	34/25051	53/63668	0.00022594	0.00186937	0.00134478
GO:0090626	plant epidermis morphogenesis	148/25051	299/63668	0.000226946	0.00186937	0.00134478
GO:0005350	pyrimidine nucleobase transmembrane transporter activity	13/25051	15/63668	0.000229122	0.00186937	0.00134478
GO:0015210	uracil transmembrane transporter activity	13/25051	15/63668	0.000229122	0.00186937	0.00134478
GO:0015855	pyrimidine nucleobase transport	13/25051	15/63668	0.000229122	0.00186937	0.00134478
GO:0015857	uracil transport	13/25051	15/63668	0.000229122	0.00186937	0.00134478
GO:0019218	regulation of steroid metabolic process	13/25051	15/63668	0.000229122	0.00186937	0.00134478
GO:0070919	production of siRNA involved in chromatin silencing by small RNA	13/25051	15/63668	0.000229122	0.00186937	0.00134478
GO:0090549	response to carbon starvation	13/25051	15/63668	0.000229122	0.00186937	0.00134478
GO:0106290	trans-cinnamate-CoA ligase activity	13/25051	15/63668	0.000229122	0.00186937	0.00134478
GO:1903829	positive regulation of cellular protein localization	13/25051	15/63668	0.000229122	0.00186937	0.00134478
GO:1904216	positive regulation of protein import into chloroplast stroma	13/25051	15/63668	0.000229122	0.00186937	0.00134478
GO:1904591	positive regulation of protein import	13/25051	15/63668	0.000229122	0.00186937	0.00134478
GO:0006633	fatty acid biosynthetic process	194/25051	404/63668	0.000235329	0.00191655	0.00137872
GO:0048581	negative regulation of post-embryonic development	173/25051	356/63668	0.000237568	0.0019313	0.00138933
GO:0010413	glucuronoxylan metabolic process	38/25051	61/63668	0.000241813	0.00195877	0.00140909
GO:0010417	glucuronoxylan biosynthetic process	38/25051	61/63668	0.000241813	0.00195877	0.00140909
GO:0098869	cellular oxidant detoxification	41/25051	67/63668	0.000243743	0.00197087	0.0014178
GO:0009863	salicylic acid mediated signaling pathway	113/25051	221/63668	0.000246819	0.00199218	0.00143313
GO:0003032	detection of oxygen	16/25051	20/63668	0.000252692	0.00202099	0.00145385
GO:0004351	glutamate decarboxylase activity	16/25051	20/63668	0.000252692	0.00202099	0.00145385
GO:0005536	glucose binding	16/25051	20/63668	0.000252692	0.00202099	0.00145385
GO:0052736	beta-glucanase activity	16/25051	20/63668	0.000252692	0.00202099	0.00145385
GO:0070483	detection of hypoxia	16/25051	20/63668	0.000252692	0.00202099	0.00145385
GO:0009846	pollen germination	117/25051	230/63668	0.000253071	0.00202099	0.00145385
GO:0006740	NADPH regeneration	58/25051	102/63668	0.000255329	0.00203543	0.00146424
GO:0033865	nucleoside bisphosphate metabolic process	92/25051	175/63668	0.000263273	0.00208771	0.00150185
GO:0033875	ribonucleoside bisphosphate metabolic process	92/25051	175/63668	0.000263273	0.00208771	0.00150185
GO:0034032	purine nucleoside bisphosphate metabolic process	92/25051	175/63668	0.000263273	0.00208771	0.00150185
GO:0004861	cyclin-dependent protein serine/threonine kinase inhibitor activity	20/25051	27/63668	0.000266593	0.00210296	0.00151282
GO:0080144	amino acid homeostasis	20/25051	27/63668	0.000266593	0.00210296	0.00151282
GO:1902554	serine/threonine protein kinase complex	20/25051	27/63668	0.000266593	0.00210296	0.00151282
GO:0006208	pyrimidine nucleobase catabolic process	11/25051	12/63668	0.000268122	0.00210401	0.00151358
GO:0006212	uracil catabolic process	11/25051	12/63668	0.000268122	0.00210401	0.00151358
GO:0016034	maleylacetoacetate isomerase activity	11/25051	12/63668	0.000268122	0.00210401	0.00151358
GO:0000272	polysaccharide catabolic process	73/25051	134/63668	0.000274043	0.00214675	0.00154432
GO:2000031	regulation of salicylic acid mediated signaling pathway	65/25051	117/63668	0.000278589	0.00217859	0.00156722
GO:0044106	cellular amine metabolic process	119/25051	235/63668	0.000285207	0.00222648	0.00160168
GO:0009072	aromatic amino acid family metabolic process	143/25051	289/63668	0.000291544	0.00227204	0.00163445
GO:0015868	purine ribonucleotide transport	27/25051	40/63668	0.000292542	0.00227589	0.00163722
GO:0015079	potassium ion transmembrane transporter activity	114/25051	224/63668	0.00029409	0.002284	0.00164305
GO:0055062	phosphate ion homeostasis	63/25051	113/63668	0.000300817	0.00232824	0.00167488
GO:0072506	trivalent inorganic anion homeostasis	63/25051	113/63668	0.000300817	0.00232824	0.00167488
GO:0009686	gibberellin biosynthetic process	52/25051	90/63668	0.00030596	0.002364	0.0017006
GO:0048528	post-embryonic root development	208/25051	438/63668	0.000311443	0.0024002	0.00172664
GO:0007584	response to nutrient	28/25051	42/63668	0.000311707	0.0024002	0.00172664
GO:0110126	phloem loading	21/25051	29/63668	0.000314925	0.00242086	0.00174151
GO:0015085	calcium ion transmembrane transporter activity	61/25051	109/63668	0.000324267	0.00248843	0.00179012
GO:0005977	glycogen metabolic process	29/25051	44/63668	0.000328572	0.00251294	0.00180775
GO:0006112	energy reserve metabolic process	29/25051	44/63668	0.000328572	0.00251294	0.00180775
GO:0047746	chlorophyllase activity	17/25051	22/63668	0.00033811	0.00258152	0.00185708
GO:0016765	transferase activity, transferring alkyl or aryl (other than methyl) groups	209/25051	441/63668	0.000346047	0.00263766	0.00189747
GO:0010100	negative regulation of photomorphogenesis	31/25051	48/63668	0.000355489	0.00270506	0.00194596
GO:0072329	monocarboxylic acid catabolic process	91/25051	174/63668	0.000356754	0.00271013	0.0019496
GO:0008886	glyceraldehyde-3-phosphate dehydrogenase (NADP+) (non-phosphorylating) activity	14/25051	17/63668	0.00036828	0.00278832	0.00200585
GO:0051290	protein heterotetramerization	14/25051	17/63668	0.00036828	0.00278832	0.00200585
GO:0010054	trichoblast differentiation	229/25051	488/63668	0.000380326	0.0028747	0.00206799
GO:0006862	nucleotide transport	41/25051	68/63668	0.000381432	0.00287825	0.00207054
GO:0042060	wound healing	40/25051	66/63668	0.000384841	0.00289914	0.00208557
GO:0048354	mucilage biosynthetic process involved in seed coat development	38/25051	62/63668	0.000388567	0.00292233	0.00210225
GO:1901654	response to ketone	23/25051	33/63668	0.000403867	0.00303235	0.0021814
GO:0004337	geranyltranstransferase activity	18/25051	24/63668	0.000424391	0.00317066	0.00228089
GO:0004575	sucrose alpha-glucosidase activity	18/25051	24/63668	0.000424391	0.00317066	0.00228089
GO:0015700	arsenite transport	18/25051	24/63668	0.000424391	0.00317066	0.00228089
GO:0019888	protein phosphatase regulator activity	62/25051	112/63668	0.000432729	0.00322762	0.00232187
GO:0016308	1-phosphatidylinositol-4-phosphate 5-kinase activity	24/25051	35/63668	0.000443068	0.00329386	0.00236952
GO:1901684	arsenate ion transmembrane transport	24/25051	35/63668	0.000443068	0.00329386	0.00236952
GO:0000217	DNA secondary structure binding	50/25051	87/63668	0.000470183	0.0034897	0.00251041
GO:0005978	glycogen biosynthetic process	25/25051	37/63668	0.000478241	0.00354369	0.00254924
GO:0046320	regulation of fatty acid oxidation	19/25051	26/63668	0.000508272	0.00374243	0.00269222
GO:0050000	chromosome localization	19/25051	26/63668	0.000508272	0.00374243	0.00269222
GO:0046937	phytochelatin metabolic process	12/25051	14/63668	0.000508375	0.00374243	0.00269222
GO:0046938	phytochelatin biosynthetic process	12/25051	14/63668	0.000508375	0.00374243	0.00269222
GO:0080163	regulation of protein serine/threonine phosphatase activity	15/25051	19/63668	0.000519127	0.00381537	0.00274469
GO:0046283	anthocyanin-containing compound metabolic process	88/25051	169/63668	0.000530837	0.0038951	0.00280204
GO:0008107	galactoside 2-alpha-L-fucosyltransferase activity	27/25051	41/63668	0.000536048	0.00391427	0.00281583
GO:0010244	response to low fluence blue light stimulus by blue low-fluence system	27/25051	41/63668	0.000536048	0.00391427	0.00281583
GO:0031127	alpha-(1,2)-fucosyltransferase activity	27/25051	41/63668	0.000536048	0.00391427	0.00281583
GO:0000162	tryptophan biosynthetic process	42/25051	71/63668	0.000573806	0.0041765	0.00300447
GO:0046219	indolalkylamine biosynthetic process	42/25051	71/63668	0.000573806	0.0041765	0.00300447
GO:0051554	flavonol metabolic process	20/25051	28/63668	0.000587421	0.00426186	0.00306588
GO:0051555	flavonol biosynthetic process	20/25051	28/63668	0.000587421	0.00426186	0.00306588
GO:0001933	negative regulation of protein phosphorylation	30/25051	47/63668	0.000592581	0.00429241	0.00308786
GO:0000978	RNA polymerase II cis-regulatory region sequence-specific DNA binding	39/25051	65/63668	0.000602291	0.00435577	0.00313344
GO:0003994	aconitate hydratase activity	10/25051	11/63668	0.00062771	0.00442628	0.00318416
GO:0006166	purine ribonucleoside salvage	10/25051	11/63668	0.00062771	0.00442628	0.00318416
GO:0008962	phosphatidylglycerophosphatase activity	10/25051	11/63668	0.00062771	0.00442628	0.00318416
GO:0009833	plant-type primary cell wall biogenesis	10/25051	11/63668	0.00062771	0.00442628	0.00318416
GO:0015893	drug transport	10/25051	11/63668	0.00062771	0.00442628	0.00318416
GO:0016295	myristoyl-[acyl-carrier-protein] hydrolase activity	10/25051	11/63668	0.00062771	0.00442628	0.00318416
GO:0016296	palmitoyl-[acyl-carrier-protein] hydrolase activity	10/25051	11/63668	0.00062771	0.00442628	0.00318416
GO:0030332	cyclin binding	10/25051	11/63668	0.00062771	0.00442628	0.00318416
GO:0042451	purine nucleoside biosynthetic process	10/25051	11/63668	0.00062771	0.00442628	0.00318416
GO:0043174	nucleoside salvage	10/25051	11/63668	0.00062771	0.00442628	0.00318416
GO:0046129	purine ribonucleoside biosynthetic process	10/25051	11/63668	0.00062771	0.00442628	0.00318416
GO:0047381	dodecanoyl-[acyl-carrier-protein] hydrolase activity	10/25051	11/63668	0.00062771	0.00442628	0.00318416
GO:0051131	chaperone-mediated protein complex assembly	10/25051	11/63668	0.00062771	0.00442628	0.00318416
GO:0051761	sesquiterpene metabolic process	10/25051	11/63668	0.00062771	0.00442628	0.00318416
GO:0090229	negative regulation of red or far-red light signaling pathway	10/25051	11/63668	0.00062771	0.00442628	0.00318416
GO:1990316	Atg1/ULK1 kinase complex	10/25051	11/63668	0.00062771	0.00442628	0.00318416
GO:0042995	cell projection	163/25051	339/63668	0.000648562	0.0045662	0.00328481
GO:0043621	protein self-association	149/25051	307/63668	0.000653089	0.00459092	0.0033026
GO:0004340	glucokinase activity	21/25051	30/63668	0.000660283	0.00461994	0.00332347
GO:0010021	amylopectin biosynthetic process	21/25051	30/63668	0.000660283	0.00461994	0.00332347
GO:2000896	amylopectin metabolic process	21/25051	30/63668	0.000660283	0.00461994	0.00332347
GO:0035091	phosphatidylinositol binding	102/25051	201/63668	0.00067176	0.00466512	0.00335598
GO:0004439	phosphatidylinositol-4,5-bisphosphate 5-phosphatase activity	16/25051	21/63668	0.000671902	0.00466512	0.00335598
GO:0034485	phosphatidylinositol-3,4,5-trisphosphate 5-phosphatase activity	16/25051	21/63668	0.000671902	0.00466512	0.00335598
GO:0034594	phosphatidylinositol trisphosphate phosphatase activity	16/25051	21/63668	0.000671902	0.00466512	0.00335598
GO:0106019	phosphatidylinositol-4,5-bisphosphate phosphatase activity	16/25051	21/63668	0.000671902	0.00466512	0.00335598
GO:0019887	protein kinase regulator activity	66/25051	122/63668	0.000673877	0.00467166	0.00336068
GO:0005543	phospholipid binding	156/25051	324/63668	0.000773494	0.00534588	0.0038457
GO:0030865	cortical cytoskeleton organization	75/25051	142/63668	0.000773497	0.00534588	0.0038457
GO:0046513	ceramide biosynthetic process	13/25051	16/63668	0.000778367	0.00537132	0.003864
GO:0006839	mitochondrial transport	90/25051	175/63668	0.000779892	0.00537365	0.00386567
GO:0009855	determination of bilateral symmetry	23/25051	34/63668	0.000783885	0.00538474	0.00387365
GO:1901160	primary amino compound metabolic process	23/25051	34/63668	0.000783885	0.00538474	0.00387365
GO:0006275	regulation of DNA replication	55/25051	99/63668	0.000789424	0.00539818	0.00388332
GO:0006817	phosphate ion transport	55/25051	99/63668	0.000789424	0.00539818	0.00388332
GO:0009827	plant-type cell wall modification	55/25051	99/63668	0.000789424	0.00539818	0.00388332
GO:0004365	glyceraldehyde-3-phosphate dehydrogenase (NAD+) (phosphorylating) activity	17/25051	23/63668	0.000819529	0.00556197	0.00400115
GO:0005685	U1 snRNP	17/25051	23/63668	0.000819529	0.00556197	0.00400115
GO:0010272	response to silver ion	17/25051	23/63668	0.000819529	0.00556197	0.00400115
GO:0019287	isopentenyl diphosphate biosynthetic process, mevalonate pathway	17/25051	23/63668	0.000819529	0.00556197	0.00400115
GO:0043891	glyceraldehyde-3-phosphate dehydrogenase (NAD(P)+) (phosphorylating) activity	17/25051	23/63668	0.000819529	0.00556197	0.00400115
GO:0048577	negative regulation of short-day photoperiodism, flowering	24/25051	36/63668	0.000834045	0.005652	0.00406591
GO:0004396	hexokinase activity	25/25051	38/63668	0.00087654	0.00593108	0.00426667
GO:0030133	transport vesicle	72/25051	136/63668	0.000893291	0.00603539	0.00434171
GO:0120025	plasma membrane bounded cell projection	153/25051	318/63668	0.000896393	0.00603585	0.00434205
GO:0010375	stomatal complex patterning	40/25051	68/63668	0.000897366	0.00603585	0.00434205
GO:0071491	cellular response to red light	40/25051	68/63668	0.000897366	0.00603585	0.00434205
GO:0009740	gibberellic acid mediated signaling pathway	87/25051	169/63668	0.000906706	0.00608962	0.00438072
GO:0042335	cuticle development	59/25051	108/63668	0.000916873	0.00614876	0.00442327
GO:0006241	CTP biosynthetic process	27/25051	42/63668	0.000939861	0.00623814	0.00448757
GO:0009148	pyrimidine nucleoside triphosphate biosynthetic process	27/25051	42/63668	0.000939861	0.00623814	0.00448757
GO:0009208	pyrimidine ribonucleoside triphosphate metabolic process	27/25051	42/63668	0.000939861	0.00623814	0.00448757
GO:0009209	pyrimidine ribonucleoside triphosphate biosynthetic process	27/25051	42/63668	0.000939861	0.00623814	0.00448757
GO:0015865	purine nucleotide transport	27/25051	42/63668	0.000939861	0.00623814	0.00448757
GO:0046036	CTP metabolic process	27/25051	42/63668	0.000939861	0.00623814	0.00448757
GO:0051503	adenine nucleotide transport	27/25051	42/63668	0.000939861	0.00623814	0.00448757
GO:0034406	cell wall beta-glucan metabolic process	37/25051	62/63668	0.000950088	0.00628755	0.00452311
GO:0052541	plant-type cell wall cellulose metabolic process	37/25051	62/63668	0.000950088	0.00628755	0.00452311
GO:0071486	cellular response to high light intensity	18/25051	25/63668	0.000957277	0.00631663	0.00454403
GO:1901679	nucleotide transmembrane transport	18/25051	25/63668	0.000957277	0.00631663	0.00454403
GO:0051223	regulation of protein transport	28/25051	44/63668	0.000961586	0.00632659	0.0045512
GO:0070201	regulation of establishment of protein localization	28/25051	44/63668	0.000961586	0.00632659	0.0045512
GO:0140103	catalytic activity, acting on a glycoprotein	29/25051	46/63668	0.000977367	0.00642108	0.00461917
GO:0016838	carbon-oxygen lyase activity, acting on phosphates	70/25051	132/63668	0.000983012	0.00644879	0.0046391
GO:0015851	nucleobase transport	32/25051	52/63668	0.000994316	0.00651349	0.00468565
GO:0019321	pentose metabolic process	48/25051	85/63668	0.00102804	0.00672463	0.00483754
GO:0002230	positive regulation of defense response to virus by host	14/25051	18/63668	0.00105386	0.00686376	0.00493763
GO:0003885	D-arabinono-1,4-lactone oxidase activity	14/25051	18/63668	0.00105386	0.00686376	0.00493763
GO:0019755	one-carbon compound transport	14/25051	18/63668	0.00105386	0.00686376	0.00493763
GO:0031329	regulation of cellular catabolic process	132/25051	271/63668	0.00106881	0.00695114	0.00500048
GO:0005471	ATP:ADP antiporter activity	19/25051	27/63668	0.00108226	0.00698832	0.00502723
GO:0008964	phosphoenolpyruvate carboxylase activity	19/25051	27/63668	0.00108226	0.00698832	0.00502723
GO:0034764	positive regulation of transmembrane transport	19/25051	27/63668	0.00108226	0.00698832	0.00502723
GO:0048442	sepal development	19/25051	27/63668	0.00108226	0.00698832	0.00502723
GO:0048464	flower calyx development	19/25051	27/63668	0.00108226	0.00698832	0.00502723
GO:0051273	beta-glucan metabolic process	142/25051	294/63668	0.00109937	0.00707877	0.0050923
GO:0034248	regulation of cellular amide metabolic process	135/25051	278/63668	0.0010994	0.00707877	0.0050923
GO:0015095	magnesium ion transmembrane transporter activity	46/25051	81/63668	0.00110231	0.0070874	0.00509851
GO:0010328	auxin influx transmembrane transporter activity	11/25051	13/63668	0.00111685	0.00713017	0.00512927
GO:0016672	oxidoreductase activity, acting on a sulfur group of donors, quinone or similar compound as acceptor	11/25051	13/63668	0.00111685	0.00713017	0.00512927
GO:0032006	regulation of TOR signaling	11/25051	13/63668	0.00111685	0.00713017	0.00512927
GO:0033355	ascorbate glutathione cycle	11/25051	13/63668	0.00111685	0.00713017	0.00512927
GO:0045174	glutathione dehydrogenase (ascorbate) activity	11/25051	13/63668	0.00111685	0.00713017	0.00512927
GO:0015276	ligand-gated ion channel activity	67/25051	126/63668	0.0011342	0.00722054	0.00519429
GO:0022834	ligand-gated channel activity	67/25051	126/63668	0.0011342	0.00722054	0.00519429
GO:0006694	steroid biosynthetic process	72/25051	137/63668	0.00116369	0.00739788	0.00532186
GO:0034285	response to disaccharide	151/25051	315/63668	0.00116731	0.00741045	0.0053309
GO:0034762	regulation of transmembrane transport	44/25051	77/63668	0.00117807	0.00746825	0.00537248
GO:0080019	fatty-acyl-CoA reductase (alcohol-forming) activity	20/25051	29/63668	0.00119297	0.00755211	0.0054328
GO:0005938	cell cortex	170/25051	359/63668	0.00120276	0.00760347	0.00546975
GO:0043622	cortical microtubule organization	71/25051	135/63668	0.00122198	0.00770686	0.00554413
GO:0016143	S-glycoside metabolic process	150/25051	313/63668	0.00122594	0.00770686	0.00554413
GO:0019757	glycosinolate metabolic process	150/25051	313/63668	0.00122594	0.00770686	0.00554413
GO:0019760	glucosinolate metabolic process	150/25051	313/63668	0.00122594	0.00770686	0.00554413
GO:0043647	inositol phosphate metabolic process	52/25051	94/63668	0.00123135	0.0077194	0.00555315
GO:0045824	negative regulation of innate immune response	52/25051	94/63668	0.00123135	0.0077194	0.00555315
GO:0022836	gated channel activity	146/25051	304/63668	0.00126481	0.00791823	0.00569618
GO:0006893	Golgi to plasma membrane transport	15/25051	20/63668	0.00131843	0.00818587	0.00588872
GO:0009828	plant-type cell wall loosening	15/25051	20/63668	0.00131843	0.00818587	0.00588872
GO:0032388	positive regulation of intracellular transport	15/25051	20/63668	0.00131843	0.00818587	0.00588872
GO:0051222	positive regulation of protein transport	15/25051	20/63668	0.00131843	0.00818587	0.00588872
GO:0090316	positive regulation of intracellular protein transport	15/25051	20/63668	0.00131843	0.00818587	0.00588872
GO:1904951	positive regulation of establishment of protein localization	15/25051	20/63668	0.00131843	0.00818587	0.00588872
GO:0009269	response to desiccation	40/25051	69/63668	0.00132915	0.00822978	0.00592031
GO:0030532	small nuclear ribonucleoprotein complex	40/25051	69/63668	0.00132915	0.00822978	0.00592031
GO:0010563	negative regulation of phosphorus metabolic process	39/25051	67/63668	0.0013656	0.00843238	0.00606605
GO:0045936	negative regulation of phosphate metabolic process	39/25051	67/63668	0.0013656	0.00843238	0.00606605
GO:0008195	phosphatidate phosphatase activity	22/25051	33/63668	0.00137004	0.00843678	0.00606922
GO:1901141	regulation of lignin biosynthetic process	22/25051	33/63668	0.00137004	0.00843678	0.00606922
GO:0047484	regulation of response to osmotic stress	96/25051	191/63668	0.00140636	0.00864864	0.00622162
GO:0050660	flavin adenine dinucleotide binding	221/25051	479/63668	0.00141601	0.00869613	0.00625579
GO:0006833	water transport	37/25051	63/63668	0.00143492	0.00876467	0.00630509
GO:0030198	extracellular matrix organization	37/25051	63/63668	0.00143492	0.00876467	0.00630509
GO:0042044	fluid transport	37/25051	63/63668	0.00143492	0.00876467	0.00630509
GO:0043062	extracellular structure organization	37/25051	63/63668	0.00143492	0.00876467	0.00630509
GO:0005388	P-type calcium transporter activity	23/25051	35/63668	0.00143712	0.00876622	0.0063062
GO:0004807	triose-phosphate isomerase activity	9/25051	10/63668	0.00145869	0.00880276	0.00633249
GO:0006059	hexitol metabolic process	9/25051	10/63668	0.00145869	0.00880276	0.00633249
GO:0009722	detection of cytokinin stimulus	9/25051	10/63668	0.00145869	0.00880276	0.00633249
GO:0010157	response to chlorate	9/25051	10/63668	0.00145869	0.00880276	0.00633249
GO:0010589	leaf proximal/distal pattern formation	9/25051	10/63668	0.00145869	0.00880276	0.00633249
GO:0033597	mitotic checkpoint complex	9/25051	10/63668	0.00145869	0.00880276	0.00633249
GO:0051762	sesquiterpene biosynthetic process	9/25051	10/63668	0.00145869	0.00880276	0.00633249
GO:0071345	cellular response to cytokine stimulus	9/25051	10/63668	0.00145869	0.00880276	0.00633249
GO:1901071	glucosamine-containing compound metabolic process	36/25051	61/63668	0.00146707	0.00882976	0.00635191
GO:1990110	callus formation	36/25051	61/63668	0.00146707	0.00882976	0.00635191
GO:0032106	positive regulation of response to extracellular stimulus	16/25051	22/63668	0.00156201	0.00931882	0.00670373
GO:0032109	positive regulation of response to nutrient levels	16/25051	22/63668	0.00156201	0.00931882	0.00670373
GO:0071217	cellular response to external biotic stimulus	16/25051	22/63668	0.00156201	0.00931882	0.00670373
GO:0080040	positive regulation of cellular response to phosphate starvation	16/25051	22/63668	0.00156201	0.00931882	0.00670373
GO:0140255	regulation of cellular response to phosphate starvation	16/25051	22/63668	0.00156201	0.00931882	0.00670373
GO:2001009	regulation of plant-type cell wall cellulose biosynthetic process	16/25051	22/63668	0.00156201	0.00931882	0.00670373
GO:0001676	long-chain fatty acid metabolic process	26/25051	41/63668	0.00156276	0.00931882	0.00670373
GO:0009678	pyrophosphate hydrolysis-driven proton transmembrane transporter activity	60/25051	112/63668	0.0015789	0.00937976	0.00674757
GO:0008106	alcohol dehydrogenase (NADP+) activity	27/25051	43/63668	0.00158297	0.00937976	0.00674757
GO:0005345	purine nucleobase transmembrane transporter activity	31/25051	51/63668	0.00158335	0.00937976	0.00674757
GO:0006863	purine nucleobase transport	31/25051	51/63668	0.00158335	0.00937976	0.00674757
GO:0015925	galactosidase activity	31/25051	51/63668	0.00158335	0.00937976	0.00674757
GO:0009410	response to xenobiotic stimulus	28/25051	45/63668	0.00159414	0.00943132	0.00678466
GO:0006417	regulation of translation	131/25051	271/63668	0.00159898	0.00944758	0.00679636
GO:0010286	heat acclimation	89/25051	176/63668	0.00162263	0.00956608	0.00688161
GO:0015707	nitrite transport	12/25051	15/63668	0.00162539	0.00956608	0.00688161
GO:1902326	positive regulation of chlorophyll biosynthetic process	12/25051	15/63668	0.00162539	0.00956608	0.00688161
GO:0009685	gibberellin metabolic process	58/25051	108/63668	0.00173367	0.0101901	0.00733053
GO:0009638	phototropism	43/25051	76/63668	0.00174248	0.010202	0.00733906
GO:0017148	negative regulation of translation	74/25051	143/63668	0.00174472	0.010202	0.00733906
GO:0034249	negative regulation of cellular amide metabolic process	74/25051	143/63668	0.00174472	0.010202	0.00733906
GO:0055081	anion homeostasis	74/25051	143/63668	0.00174472	0.010202	0.00733906
GO:0045492	xylan biosynthetic process	57/25051	106/63668	0.00181629	0.0106068	0.00763024
GO:0071446	cellular response to salicylic acid stimulus	114/25051	233/63668	0.00183871	0.0107238	0.00771448
GO:1990748	cellular detoxification	41/25051	72/63668	0.00186818	0.0108702	0.00781977
GO:0030244	cellulose biosynthetic process	110/25051	224/63668	0.00186862	0.0108702	0.00781977
GO:0009593	detection of chemical stimulus	56/25051	104/63668	0.00190256	0.0110534	0.00795157
GO:0048764	trichoblast maturation	217/25051	472/63668	0.00192054	0.0111293	0.00800612
GO:0048765	root hair cell differentiation	217/25051	472/63668	0.00192054	0.0111293	0.00800612
GO:0071900	regulation of protein serine/threonine kinase activity	40/25051	70/63668	0.0019317	0.0111763	0.00803996
GO:0045088	regulation of innate immune response	144/25051	302/63668	0.0019336	0.0111763	0.00803996
GO:0072529	pyrimidine-containing compound catabolic process	18/25051	26/63668	0.00196754	0.011358	0.00817064
GO:0006816	calcium ion transport	61/25051	115/63668	0.00198762	0.0114592	0.00824351
GO:2000904	regulation of starch metabolic process	48/25051	87/63668	0.00200277	0.0115319	0.00829575
GO:0016307	phosphatidylinositol phosphate kinase activity	38/25051	66/63668	0.00205862	0.0118384	0.00851625
GO:0051606	detection of stimulus	104/25051	211/63668	0.00209676	0.0120181	0.00864554
GO:0051668	localization within membrane	115/25051	236/63668	0.0020997	0.0120181	0.00864554
GO:0006083	acetate metabolic process	13/25051	17/63668	0.00211115	0.0120181	0.00864554
GO:0006123	mitochondrial electron transport, cytochrome c to oxygen	13/25051	17/63668	0.00211115	0.0120181	0.00864554
GO:0010338	leaf formation	13/25051	17/63668	0.00211115	0.0120181	0.00864554
GO:0016207	4-coumarate-CoA ligase activity	13/25051	17/63668	0.00211115	0.0120181	0.00864554
GO:0043295	glutathione binding	13/25051	17/63668	0.00211115	0.0120181	0.00864554
GO:1900750	oligopeptide binding	13/25051	17/63668	0.00211115	0.0120181	0.00864554
GO:0018198	peptidyl-cysteine modification	19/25051	28/63668	0.00212693	0.0120927	0.0086992
GO:0042168	heme metabolic process	36/25051	62/63668	0.00218289	0.0123891	0.00891241
GO:0043562	cellular response to nitrogen levels	53/25051	98/63668	0.00218454	0.0123891	0.00891241
GO:0090056	regulation of chlorophyll metabolic process	45/25051	81/63668	0.00226711	0.0128413	0.00923772
GO:0048767	root hair elongation	127/25051	264/63668	0.00231566	0.0130999	0.00942373
GO:0004620	phospholipase activity	113/25051	232/63668	0.00232343	0.0131274	0.00944351
GO:1901616	organic hydroxy compound catabolic process	68/25051	131/63668	0.00236208	0.0133291	0.00958863
GO:0042430	indole-containing compound metabolic process	116/25051	239/63668	0.00238918	0.0134652	0.00968652
GO:0006884	cell volume homeostasis	10/25051	12/63668	0.00242565	0.013519	0.00972526
GO:0016165	linoleate 13S-lipoxygenase activity	10/25051	12/63668	0.00242565	0.013519	0.00972526
GO:0030527	structural constituent of chromatin	10/25051	12/63668	0.00242565	0.013519	0.00972526
GO:0035061	interchromatin granule	10/25051	12/63668	0.00242565	0.013519	0.00972526
GO:0050105	L-gulonolactone oxidase activity	10/25051	12/63668	0.00242565	0.013519	0.00972526
GO:0051011	microtubule minus-end binding	10/25051	12/63668	0.00242565	0.013519	0.00972526
GO:0070178	D-serine metabolic process	10/25051	12/63668	0.00242565	0.013519	0.00972526
GO:0080033	response to nitrite	10/25051	12/63668	0.00242565	0.013519	0.00972526
GO:0090397	stigma papilla	10/25051	12/63668	0.00242565	0.013519	0.00972526
GO:0032881	regulation of polysaccharide metabolic process	81/25051	160/63668	0.0024483	0.0136285	0.009804
GO:0009750	response to fructose	43/25051	77/63668	0.00245631	0.0136562	0.00982395
GO:0048469	cell maturation	217/25051	474/63668	0.00246358	0.0136798	0.00984093
GO:0042326	negative regulation of phosphorylation	30/25051	50/63668	0.00249369	0.01383	0.009949
GO:0010371	regulation of gibberellin biosynthetic process	23/25051	36/63668	0.00250409	0.0138707	0.00997824
GO:0015149	hexose transmembrane transporter activity	14/25051	19/63668	0.00255112	0.0140623	0.0101161
GO:0019048	modulation by virus of host process	14/25051	19/63668	0.00255112	0.0140623	0.0101161
GO:0044003	modulation by symbiont of host process	14/25051	19/63668	0.00255112	0.0140623	0.0101161
GO:0046416	D-amino acid metabolic process	14/25051	19/63668	0.00255112	0.0140623	0.0101161
GO:0009637	response to blue light	151/25051	320/63668	0.0025655	0.014114	0.0101533
GO:0051289	protein homotetramerization	25/25051	40/63668	0.00256704	0.014114	0.0101533
GO:0032409	regulation of transporter activity	27/25051	44/63668	0.00256988	0.014114	0.0101533
GO:0010337	regulation of salicylic acid metabolic process	26/25051	42/63668	0.00257497	0.0141248	0.010161
GO:0009734	auxin-activated signaling pathway	154/25051	327/63668	0.00258213	0.0141469	0.010177
GO:0009787	regulation of abscisic acid-activated signaling pathway	204/25051	444/63668	0.00264887	0.01446	0.0104022
GO:1901419	regulation of response to alcohol	204/25051	444/63668	0.00264887	0.01446	0.0104022
GO:1905957	regulation of cellular response to alcohol	204/25051	444/63668	0.00264887	0.01446	0.0104022
GO:0005315	inorganic phosphate transmembrane transporter activity	48/25051	88/63668	0.00273892	0.0149336	0.0107428
GO:0032103	positive regulation of response to external stimulus	140/25051	295/63668	0.00275244	0.0149892	0.0107829
GO:0008361	regulation of cell size	54/25051	101/63668	0.00278317	0.0151383	0.0108901
GO:1901002	positive regulation of response to salt stress	47/25051	86/63668	0.00286342	0.0155561	0.0111907
GO:0044092	negative regulation of molecular function	94/25051	190/63668	0.0028824	0.0156404	0.0112513
GO:0004069	L-aspartate:2-oxoglutarate aminotransferase activity	15/25051	21/63668	0.00293476	0.0158295	0.0113873
GO:0004563	beta-N-acetylhexosaminidase activity	15/25051	21/63668	0.00293476	0.0158295	0.0113873
GO:0004792	thiosulfate sulfurtransferase activity	15/25051	21/63668	0.00293476	0.0158295	0.0113873
GO:0015929	hexosaminidase activity	15/25051	21/63668	0.00293476	0.0158295	0.0113873
GO:0051560	mitochondrial calcium ion homeostasis	15/25051	21/63668	0.00293476	0.0158295	0.0113873
GO:0008202	steroid metabolic process	104/25051	213/63668	0.00305799	0.0164534	0.0118362
GO:0009524	phragmoplast	104/25051	213/63668	0.00305799	0.0164534	0.0118362
GO:0008028	monocarboxylic acid transmembrane transporter activity	52/25051	97/63668	0.00306135	0.0164534	0.0118362
GO:0019852	L-ascorbic acid metabolic process	57/25051	108/63668	0.00316703	0.0170011	0.0122302
GO:0004867	serine-type endopeptidase inhibitor activity	80/25051	159/63668	0.00320741	0.0171975	0.0123714
GO:0015696	ammonium transport	16/25051	23/63668	0.00325912	0.0174334	0.0125412
GO:0072488	ammonium transmembrane transport	16/25051	23/63668	0.00325912	0.0174334	0.0125412
GO:0090481	pyrimidine nucleotide-sugar transmembrane transport	44/25051	80/63668	0.00326549	0.0174468	0.0125508
GO:0010103	stomatal complex morphogenesis	35/25051	61/63668	0.00328714	0.0175418	0.0126191
GO:0000774	adenyl-nucleotide exchange factor activity	11/25051	14/63668	0.00334792	0.0177822	0.0127921
GO:0042439	ethanolamine-containing compound metabolic process	11/25051	14/63668	0.00334792	0.0177822	0.0127921
GO:0055089	fatty acid homeostasis	11/25051	14/63668	0.00334792	0.0177822	0.0127921
GO:0060590	ATPase regulator activity	11/25051	14/63668	0.00334792	0.0177822	0.0127921
GO:0010105	negative regulation of ethylene-activated signaling pathway	50/25051	93/63668	0.00336553	0.0178129	0.0128142
GO:0070298	negative regulation of phosphorelay signal transduction system	50/25051	93/63668	0.00336553	0.0178129	0.0128142
GO:1901699	cellular response to nitrogen compound	50/25051	93/63668	0.00336553	0.0178129	0.0128142
GO:0090406	pollen tube	116/25051	241/63668	0.00338462	0.017893	0.0128718
GO:0080147	root hair cell development	169/25051	364/63668	0.00346403	0.0182914	0.0131584
GO:0090333	regulation of stomatal closure	55/25051	104/63668	0.00349584	0.0184078	0.0132421
GO:0009218	pyrimidine ribonucleotide metabolic process	33/25051	57/63668	0.00349829	0.0184078	0.0132421
GO:0009220	pyrimidine ribonucleotide biosynthetic process	33/25051	57/63668	0.00349829	0.0184078	0.0132421
GO:0019395	fatty acid oxidation	65/25051	126/63668	0.00351795	0.0184656	0.0132837
GO:0010508	positive regulation of autophagy	17/25051	25/63668	0.00352563	0.0184656	0.0132837
GO:0046886	positive regulation of hormone biosynthetic process	17/25051	25/63668	0.00352563	0.0184656	0.0132837
GO:0072334	UDP-galactose transmembrane transport	17/25051	25/63668	0.00352563	0.0184656	0.0132837
GO:0046885	regulation of hormone biosynthetic process	42/25051	76/63668	0.00355756	0.0185683	0.0133576
GO:0051286	cell tip	42/25051	76/63668	0.00355756	0.0185683	0.0133576
GO:0060187	cell pole	42/25051	76/63668	0.00355756	0.0185683	0.0133576
GO:1901000	regulation of response to salt stress	82/25051	164/63668	0.00357442	0.0186348	0.0134054
GO:0009531	secondary cell wall	32/25051	55/63668	0.00360077	0.018729	0.0134732
GO:0015205	nucleobase transmembrane transporter activity	32/25051	55/63668	0.00360077	0.018729	0.0134732
GO:0055028	cortical microtubule	73/25051	144/63668	0.00370496	0.0191905	0.0138052
GO:0015662	P-type ion transporter activity	41/25051	74/63668	0.00371073	0.0191905	0.0138052
GO:0097237	cellular response to toxic substance	41/25051	74/63668	0.00371073	0.0191905	0.0138052
GO:0140318	protein transporter activity	41/25051	74/63668	0.00371073	0.0191905	0.0138052
GO:0140358	P-type transmembrane transporter activity	41/25051	74/63668	0.00371073	0.0191905	0.0138052
GO:0044843	cell cycle G1/S phase transition	18/25051	27/63668	0.00373809	0.0193099	0.0138911
GO:0005496	steroid binding	19/25051	29/63668	0.00390145	0.0201078	0.0144651
GO:0006656	phosphatidylcholine biosynthetic process	19/25051	29/63668	0.00390145	0.0201078	0.0144651
GO:0009744	response to sucrose	145/25051	309/63668	0.00396401	0.0203966	0.0146728
GO:0019751	polyol metabolic process	80/25051	160/63668	0.00396651	0.0203966	0.0146728
GO:0051553	flavone biosynthetic process	20/25051	31/63668	0.00402102	0.0206534	0.0148576
GO:0009610	response to symbiotic fungus	27/25051	45/63668	0.00403347	0.0206939	0.0148867
GO:0010305	leaf vascular tissue pattern formation	52/25051	98/63668	0.00405254	0.0207681	0.0149401
GO:0006559	L-phenylalanine catabolic process	26/25051	43/63668	0.00409213	0.0209236	0.0150519
GO:1902222	erythrose 4-phosphate/phosphoenolpyruvate family amino acid catabolic process	26/25051	43/63668	0.00409213	0.0209236	0.0150519
GO:0031122	cytoplasmic microtubule organization	71/25051	140/63668	0.0041114	0.0209984	0.0151057
GO:0031507	heterochromatin assembly	57/25051	109/63668	0.00412036	0.0210204	0.0151215
GO:0031930	mitochondria-nucleus signaling pathway	25/25051	41/63668	0.00413623	0.0210525	0.0151447
GO:0016742	hydroxymethyl-, formyl- and related transferase activity	22/25051	35/63668	0.00414976	0.0210525	0.0151447
GO:0015105	arsenite transmembrane transporter activity	12/25051	16/63668	0.00416645	0.0210525	0.0151447
GO:0016618	hydroxypyruvate reductase activity	12/25051	16/63668	0.00416645	0.0210525	0.0151447
GO:0018158	protein oxidation	12/25051	16/63668	0.00416645	0.0210525	0.0151447
GO:0018171	peptidyl-cysteine oxidation	12/25051	16/63668	0.00416645	0.0210525	0.0151447
GO:0030523	dihydrolipoamide S-acyltransferase activity	12/25051	16/63668	0.00416645	0.0210525	0.0151447
GO:0034214	protein hexamerization	12/25051	16/63668	0.00416645	0.0210525	0.0151447
GO:0009799	specification of symmetry	23/25051	37/63668	0.00416859	0.0210525	0.0151447
GO:0055082	cellular chemical homeostasis	199/25051	436/63668	0.00422283	0.0213027	0.0153246
GO:0007030	Golgi organization	37/25051	66/63668	0.00436761	0.0220085	0.0158324
GO:0016114	terpenoid biosynthetic process	198/25051	434/63668	0.00441014	0.022198	0.0159687
GO:0015849	organic acid transport	136/25051	289/63668	0.00453431	0.0227976	0.0164001
GO:0016538	cyclin-dependent protein serine/threonine kinase regulator activity	36/25051	64/63668	0.00454157	0.0228087	0.0164081
GO:0034440	lipid oxidation	69/25051	136/63668	0.00456348	0.0228934	0.016469
GO:0033293	monocarboxylic acid binding	96/25051	197/63668	0.00460485	0.0230753	0.0165998
GO:1901657	glycosyl compound metabolic process	208/25051	458/63668	0.00461392	0.0230951	0.0166141
GO:0004427	inorganic diphosphatase activity	35/25051	62/63668	0.00471859	0.023593	0.0169722
GO:0009567	double fertilization forming a zygote and endosperm	68/25051	134/63668	0.00480827	0.0240148	0.0172756
GO:0010309	acireductone dioxygenase [iron(II)-requiring] activity	13/25051	18/63668	0.00486009	0.0240873	0.0173278
GO:0032527	protein exit from endoplasmic reticulum	13/25051	18/63668	0.00486009	0.0240873	0.0173278
GO:0046786	viral replication complex formation and maintenance	13/25051	18/63668	0.00486009	0.0240873	0.0173278
GO:0070141	response to UV-A	13/25051	18/63668	0.00486009	0.0240873	0.0173278
GO:0071492	cellular response to UV-A	13/25051	18/63668	0.00486009	0.0240873	0.0173278
GO:1904215	regulation of protein import into chloroplast stroma	13/25051	18/63668	0.00486009	0.0240873	0.0173278
GO:1904589	regulation of protein import	13/25051	18/63668	0.00486009	0.0240873	0.0173278
GO:0010588	cotyledon vascular tissue pattern formation	34/25051	60/63668	0.00489808	0.024249	0.0174441
GO:0009645	response to low light intensity stimulus	33/25051	58/63668	0.0050793	0.0251186	0.0180697
GO:0009789	positive regulation of abscisic acid-activated signaling pathway	75/25051	150/63668	0.00515065	0.0254436	0.0183035
GO:0010453	regulation of cell fate commitment	9/25051	11/63668	0.00519808	0.0255662	0.0183917
GO:0016825	hydrolase activity, acting on acid phosphorus-nitrogen bonds	9/25051	11/63668	0.00519808	0.0255662	0.0183917
GO:0080168	abscisic acid transport	9/25051	11/63668	0.00519808	0.0255662	0.0183917
GO:0101006	protein histidine phosphatase activity	9/25051	11/63668	0.00519808	0.0255662	0.0183917
GO:0071365	cellular response to auxin stimulus	180/25051	393/63668	0.00525156	0.0258011	0.0185607
GO:0010090	trichome morphogenesis	117/25051	246/63668	0.00528606	0.0259424	0.0186624
GO:0042937	tripeptide transmembrane transporter activity	14/25051	20/63668	0.00542739	0.026483	0.0190512
GO:0042938	dipeptide transport	14/25051	20/63668	0.00542739	0.026483	0.0190512
GO:0048479	style development	14/25051	20/63668	0.00542739	0.026483	0.0190512
GO:0051511	negative regulation of unidimensional cell growth	14/25051	20/63668	0.00542739	0.026483	0.0190512
GO:0071916	dipeptide transmembrane transporter activity	14/25051	20/63668	0.00542739	0.026483	0.0190512
GO:0000303	response to superoxide	31/25051	54/63668	0.00544307	0.026483	0.0190512
GO:0000305	response to oxygen radical	31/25051	54/63668	0.00544307	0.026483	0.0190512
GO:0016783	sulfurtransferase activity	31/25051	54/63668	0.00544307	0.026483	0.0190512
GO:0015850	organic hydroxy compound transport	30/25051	52/63668	0.00562321	0.02733	0.0196605
GO:0051247	positive regulation of protein metabolic process	92/25051	189/63668	0.00565594	0.0274596	0.0197537
GO:0006040	amino sugar metabolic process	45/25051	84/63668	0.00570519	0.0276689	0.0199044
GO:0019206	nucleoside kinase activity	15/25051	22/63668	0.00587635	0.0282757	0.0203408
GO:0030267	glyoxylate reductase (NADP+) activity	15/25051	22/63668	0.00587635	0.0282757	0.0203408
GO:0031998	regulation of fatty acid beta-oxidation	15/25051	22/63668	0.00587635	0.0282757	0.0203408
GO:0045736	negative regulation of cyclin-dependent protein serine/threonine kinase activity	15/25051	22/63668	0.00587635	0.0282757	0.0203408
GO:0071588	hydrogen peroxide mediated signaling pathway	15/25051	22/63668	0.00587635	0.0282757	0.0203408
GO:0106345	glyoxylate reductase activity	15/25051	22/63668	0.00587635	0.0282757	0.0203408
GO:1904030	negative regulation of cyclin-dependent protein kinase activity	15/25051	22/63668	0.00587635	0.0282757	0.0203408
GO:0071805	potassium ion transmembrane transport	84/25051	171/63668	0.00588034	0.0282757	0.0203408
GO:0004033	aldo-keto reductase (NADP) activity	27/25051	46/63668	0.00613649	0.0294447	0.0211818
GO:0009147	pyrimidine nucleoside triphosphate metabolic process	27/25051	46/63668	0.00613649	0.0294447	0.0211818
GO:0060918	auxin transport	182/25051	399/63668	0.00615189	0.0294873	0.0212125
GO:0048832	specification of plant organ number	16/25051	24/63668	0.00621905	0.0297461	0.0213987
GO:0048833	specification of floral organ number	16/25051	24/63668	0.00621905	0.0297461	0.0213987
GO:1902074	response to salt	71/25051	142/63668	0.00635516	0.0303651	0.0218439
GO:0033926	glycopeptide alpha-N-acetylgalactosaminidase activity	17/25051	26/63668	0.00646868	0.0308748	0.0222106
GO:0071484	cellular response to light intensity	24/25051	40/63668	0.00655651	0.031261	0.0224884
GO:0046903	secretion	122/25051	259/63668	0.00659977	0.0313734	0.0225692
GO:0006968	cellular defense response	18/25051	28/63668	0.0066382	0.0313734	0.0225692
GO:0015038	glutathione disulfide oxidoreductase activity	18/25051	28/63668	0.0066382	0.0313734	0.0225692
GO:0046352	disaccharide catabolic process	18/25051	28/63668	0.0066382	0.0313734	0.0225692
GO:0090599	alpha-glucosidase activity	18/25051	28/63668	0.0066382	0.0313734	0.0225692
GO:0015450	protein-transporting ATPase activity	23/25051	38/63668	0.00665944	0.0313734	0.0225692
GO:0016161	beta-amylase activity	22/25051	36/63668	0.0067358	0.0313734	0.0225692
GO:2000037	regulation of stomatal complex patterning	19/25051	30/63668	0.00673956	0.0313734	0.0225692
GO:0009813	flavonoid biosynthetic process	85/25051	174/63668	0.00674949	0.0313734	0.0225692
GO:0018258	protein O-linked glycosylation via hydroxyproline	21/25051	34/63668	0.00677953	0.0313734	0.0225692
GO:0032958	inositol phosphate biosynthetic process	21/25051	34/63668	0.00677953	0.0313734	0.0225692
GO:1990714	hydroxyproline O-galactosyltransferase activity	21/25051	34/63668	0.00677953	0.0313734	0.0225692
GO:0051552	flavone metabolic process	20/25051	32/63668	0.00678352	0.0313734	0.0225692
GO:0071586	CAAX-box protein processing	20/25051	32/63668	0.00678352	0.0313734	0.0225692
GO:0080120	CAAX-box protein maturation	20/25051	32/63668	0.00678352	0.0313734	0.0225692
GO:0003861	3-isopropylmalate dehydratase activity	10/25051	13/63668	0.00678831	0.0313734	0.0225692
GO:0004820	glycine-tRNA ligase activity	10/25051	13/63668	0.00678831	0.0313734	0.0225692
GO:0006101	citrate metabolic process	10/25051	13/63668	0.00678831	0.0313734	0.0225692
GO:0006426	glycyl-tRNA aminoacylation	10/25051	13/63668	0.00678831	0.0313734	0.0225692
GO:0006527	arginine catabolic process	10/25051	13/63668	0.00678831	0.0313734	0.0225692
GO:0009163	nucleoside biosynthetic process	10/25051	13/63668	0.00678831	0.0313734	0.0225692
GO:0015168	glycerol transmembrane transporter activity	10/25051	13/63668	0.00678831	0.0313734	0.0225692
GO:0034337	RNA folding	10/25051	13/63668	0.00678831	0.0313734	0.0225692
GO:0034404	nucleobase-containing small molecule biosynthetic process	10/25051	13/63668	0.00678831	0.0313734	0.0225692
GO:0042455	ribonucleoside biosynthetic process	10/25051	13/63668	0.00678831	0.0313734	0.0225692
GO:0102053	(-)-jasmonoyl-isoleucine synthetase activity	10/25051	13/63668	0.00678831	0.0313734	0.0225692
GO:0102057	jasmonoyl-valine synthetase activity	10/25051	13/63668	0.00678831	0.0313734	0.0225692
GO:0102058	jasmonoyl-leucine synthetase activity	10/25051	13/63668	0.00678831	0.0313734	0.0225692
GO:1904961	quiescent center organization	10/25051	13/63668	0.00678831	0.0313734	0.0225692
GO:2000694	regulation of phragmoplast microtubule organization	10/25051	13/63668	0.00678831	0.0313734	0.0225692
GO:0035967	cellular response to topologically incorrect protein	41/25051	76/63668	0.00691772	0.0319388	0.022976
GO:0016226	iron-sulfur cluster assembly	46/25051	87/63668	0.00718523	0.0331063	0.0238158
GO:0031163	metallo-sulfur cluster assembly	46/25051	87/63668	0.00718523	0.0331063	0.0238158
GO:0002764	immune response-regulating signaling pathway	76/25051	154/63668	0.00735036	0.0338326	0.0243384
GO:0051235	maintenance of location	64/25051	127/63668	0.00741626	0.0341012	0.0245316
GO:0019319	hexose biosynthetic process	32/25051	57/63668	0.00751801	0.0344989	0.0248177
GO:0019915	lipid storage	32/25051	57/63668	0.00751801	0.0344989	0.0248177
GO:0006470	protein dephosphorylation	143/25051	309/63668	0.00764796	0.0350596	0.025221
GO:0051274	beta-glucan biosynthetic process	128/25051	274/63668	0.00770115	0.0352677	0.0253707
GO:0010345	suberin biosynthetic process	31/25051	55/63668	0.00782271	0.0357519	0.0257191
GO:0050829	defense response to Gram-negative bacterium	31/25051	55/63668	0.00782271	0.0357519	0.0257191
GO:0009292	genetic transfer	54/25051	105/63668	0.00793715	0.0362017	0.0260426
GO:0009294	DNA mediated transformation	54/25051	105/63668	0.00793715	0.0362017	0.0260426
GO:0015165	pyrimidine nucleotide-sugar transmembrane transporter activity	44/25051	83/63668	0.00794694	0.0362098	0.0260485
GO:0009756	carbohydrate mediated signaling	78/25051	159/63668	0.00804354	0.0364708	0.0262362
GO:0010182	sugar mediated signaling pathway	78/25051	159/63668	0.00804354	0.0364708	0.0262362
GO:0004765	shikimate kinase activity	11/25051	15/63668	0.0080849	0.0364708	0.0262362
GO:0009768	photosynthesis, light harvesting in photosystem I	11/25051	15/63668	0.0080849	0.0364708	0.0262362
GO:0010436	carotenoid dioxygenase activity	11/25051	15/63668	0.0080849	0.0364708	0.0262362
GO:0016713	oxidoreductase activity, acting on paired donors, with incorporation or reduction of molecular oxygen, reduced iron-sulfur protein as one donor, and incorporation of one atom of oxygen	11/25051	15/63668	0.0080849	0.0364708	0.0262362
GO:0045471	response to ethanol	11/25051	15/63668	0.0080849	0.0364708	0.0262362
GO:0045549	9-cis-epoxycarotenoid dioxygenase activity	11/25051	15/63668	0.0080849	0.0364708	0.0262362
GO:0046577	long-chain-alcohol oxidase activity	11/25051	15/63668	0.0080849	0.0364708	0.0262362
GO:1905328	plant septum development	11/25051	15/63668	0.0080849	0.0364708	0.0262362
GO:0009825	multidimensional cell growth	58/25051	114/63668	0.00813771	0.0366724	0.0263813
GO:0070828	heterochromatin organization	62/25051	123/63668	0.00824596	0.0370918	0.026683
GO:0009955	adaxial/abaxial pattern specification	70/25051	141/63668	0.00824719	0.0370918	0.026683
GO:0051240	positive regulation of multicellular organismal process	161/25051	352/63668	0.00838507	0.0376745	0.0271021
GO:0050897	cobalt ion binding	77/25051	157/63668	0.00847644	0.0380472	0.0273702
GO:0030981	cortical microtubule cytoskeleton	73/25051	148/63668	0.00860768	0.0385979	0.0277664
GO:0015766	disaccharide transport	28/25051	49/63668	0.00875812	0.039156	0.0281679
GO:0015770	sucrose transport	28/25051	49/63668	0.00875812	0.039156	0.0281679
GO:0015772	oligosaccharide transport	28/25051	49/63668	0.00875812	0.039156	0.0281679
GO:0048582	positive regulation of post-embryonic development	137/25051	296/63668	0.00882067	0.0393966	0.028341
GO:0031349	positive regulation of defense response	134/25051	289/63668	0.0088487	0.0394828	0.028403
GO:1990542	mitochondrial transmembrane transport	47/25051	90/63668	0.00891024	0.0397182	0.0285723
GO:0003756	protein disulfide isomerase activity	27/25051	47/63668	0.00907095	0.0402429	0.0289498
GO:0016864	intramolecular oxidoreductase activity, transposing S-S bonds	27/25051	47/63668	0.00907095	0.0402429	0.0289498
GO:0003883	CTP synthase activity	12/25051	17/63668	0.00909917	0.0402429	0.0289498
GO:0005355	glucose transmembrane transporter activity	12/25051	17/63668	0.00909917	0.0402429	0.0289498
GO:0010306	rhamnogalacturonan II biosynthetic process	12/25051	17/63668	0.00909917	0.0402429	0.0289498
GO:0010396	rhamnogalacturonan II metabolic process	12/25051	17/63668	0.00909917	0.0402429	0.0289498
GO:0046835	carbohydrate phosphorylation	12/25051	17/63668	0.00909917	0.0402429	0.0289498
GO:0070492	oligosaccharide binding	12/25051	17/63668	0.00909917	0.0402429	0.0289498
GO:0009583	detection of light stimulus	41/25051	77/63668	0.00923951	0.0408237	0.0293675
GO:0032880	regulation of protein localization	51/25051	99/63668	0.00929673	0.0409963	0.0294918
GO:0045859	regulation of protein kinase activity	51/25051	99/63668	0.00929673	0.0409963	0.0294918
GO:0005310	dicarboxylic acid transmembrane transporter activity	34/25051	62/63668	0.00960791	0.0423272	0.0304492
GO:0008061	chitin binding	25/25051	43/63668	0.00968231	0.042572	0.0306253
GO:0015977	carbon fixation	25/25051	43/63668	0.00968231	0.042572	0.0306253
GO:0006558	L-phenylalanine metabolic process	40/25051	75/63668	0.00971402	0.0426285	0.0306659
GO:1902221	erythrose 4-phosphate/phosphoenolpyruvate family amino acid metabolic process	40/25051	75/63668	0.00971402	0.0426285	0.0306659
GO:0000287	magnesium ion binding	182/25051	403/63668	0.00984236	0.0430054	0.030937
GO:0004058	aromatic-L-amino-acid decarboxylase activity	13/25051	19/63668	0.00986287	0.0430054	0.030937
GO:0009835	fruit ripening	13/25051	19/63668	0.00986287	0.0430054	0.030937
GO:0015689	molybdate ion transport	13/25051	19/63668	0.00986287	0.0430054	0.030937
GO:0036469	L-tryptophan decarboxylase activity	13/25051	19/63668	0.00986287	0.0430054	0.030937
GO:0046715	active borate transmembrane transporter activity	13/25051	19/63668	0.00986287	0.0430054	0.030937
GO:0006006	glucose metabolic process	45/25051	86/63668	0.00988553	0.0430054	0.030937
GO:0035966	response to topologically incorrect protein	45/25051	86/63668	0.00988553	0.0430054	0.030937
GO:2000022	regulation of jasmonic acid mediated signaling pathway	45/25051	86/63668	0.00988553	0.0430054	0.030937
GO:0015748	organophosphate ester transport	74/25051	151/63668	0.00992396	0.0431311	0.0310274
GO:0006874	cellular calcium ion homeostasis	33/25051	60/63668	0.0100557	0.0436618	0.0314093
GO:0000956	nuclear-transcribed mRNA catabolic process	70/25051	142/63668	0.0100867	0.043754	0.0314756
GO:0019207	kinase regulator activity	66/25051	133/63668	0.0101973	0.0441815	0.0317831
GO:0010333	terpene synthase activity	58/25051	115/63668	0.0102047	0.0441815	0.0317831
GO:0016607	nuclear speck	77/25051	158/63668	0.010243	0.0443045	0.0318716
GO:0008889	glycerophosphodiester phosphodiesterase activity	14/25051	21/63668	0.0104126	0.0449095	0.0323068
GO:0015204	urea transmembrane transporter activity	14/25051	21/63668	0.0104126	0.0449095	0.0323068
GO:0038199	ethylene receptor activity	14/25051	21/63668	0.0104126	0.0449095	0.0323068
GO:0007623	circadian rhythm	207/25051	463/63668	0.010442	0.0449503	0.0323362
GO:0048511	rhythmic process	207/25051	463/63668	0.010442	0.0449503	0.0323362
GO:0009413	response to flooding	22/25051	37/63668	0.0105011	0.0451615	0.0324881
GO:0016298	lipase activity	127/25051	274/63668	0.0107023	0.0457782	0.0329318
GO:0006636	unsaturated fatty acid biosynthetic process	21/25051	35/63668	0.0107242	0.0457782	0.0329318
GO:0033559	unsaturated fatty acid metabolic process	21/25051	35/63668	0.0107242	0.0457782	0.0329318
GO:0097164	ammonium ion metabolic process	21/25051	35/63668	0.0107242	0.0457782	0.0329318
GO:0009644	response to high light intensity	93/25051	195/63668	0.0107783	0.0457782	0.0329318
GO:0010601	positive regulation of auxin biosynthetic process	15/25051	23/63668	0.0107837	0.0457782	0.0329318
GO:0048576	positive regulation of short-day photoperiodism, flowering	15/25051	23/63668	0.0107837	0.0457782	0.0329318
GO:0051740	ethylene binding	15/25051	23/63668	0.0107837	0.0457782	0.0329318
GO:0072328	alkene binding	15/25051	23/63668	0.0107837	0.0457782	0.0329318
GO:0019829	ATPase-coupled cation transmembrane transporter activity	76/25051	156/63668	0.0107941	0.0457782	0.0329318
GO:0042545	cell wall modification	144/25051	314/63668	0.0108407	0.0457782	0.0329318
GO:0009581	detection of external stimulus	48/25051	93/63668	0.010896	0.0457782	0.0329318
GO:0009582	detection of abiotic stimulus	48/25051	93/63668	0.010896	0.0457782	0.0329318
GO:0009690	cytokinin metabolic process	48/25051	93/63668	0.010896	0.0457782	0.0329318
GO:0055071	manganese ion homeostasis	20/25051	33/63668	0.0109088	0.0457782	0.0329318
GO:0003785	actin monomer binding	8/25051	10/63668	0.010964	0.0457782	0.0329318
GO:0003830	beta-1,4-mannosylglycoprotein 4-beta-N-acetylglucosaminyltransferase activity	8/25051	10/63668	0.010964	0.0457782	0.0329318
GO:0003985	acetyl-CoA C-acetyltransferase activity	8/25051	10/63668	0.010964	0.0457782	0.0329318
GO:0006851	mitochondrial calcium ion transmembrane transport	8/25051	10/63668	0.010964	0.0457782	0.0329318
GO:0008705	methionine synthase activity	8/25051	10/63668	0.010964	0.0457782	0.0329318
GO:0009769	photosynthesis, light harvesting in photosystem II	8/25051	10/63668	0.010964	0.0457782	0.0329318
GO:0016453	C-acetyltransferase activity	8/25051	10/63668	0.010964	0.0457782	0.0329318
GO:0017096	acetylserotonin O-methyltransferase activity	8/25051	10/63668	0.010964	0.0457782	0.0329318
GO:0019187	beta-1,4-mannosyltransferase activity	8/25051	10/63668	0.010964	0.0457782	0.0329318
GO:0030388	fructose 1,6-bisphosphate metabolic process	8/25051	10/63668	0.010964	0.0457782	0.0329318
GO:0031588	nucleotide-activated protein kinase complex	8/25051	10/63668	0.010964	0.0457782	0.0329318
GO:0042084	5-methyltetrahydrofolate-dependent methyltransferase activity	8/25051	10/63668	0.010964	0.0457782	0.0329318
GO:0043408	regulation of MAPK cascade	8/25051	10/63668	0.010964	0.0457782	0.0329318
GO:0048314	embryo sac morphogenesis	8/25051	10/63668	0.010964	0.0457782	0.0329318
GO:0051753	mannan synthase activity	8/25051	10/63668	0.010964	0.0457782	0.0329318
GO:0051998	protein carboxyl O-methyltransferase activity	8/25051	10/63668	0.010964	0.0457782	0.0329318
GO:0015693	magnesium ion transport	43/25051	82/63668	0.0109685	0.0457782	0.0329318
GO:0060776	simple leaf morphogenesis	16/25051	25/63668	0.0110074	0.0458455	0.0329801
GO:1902446	regulation of shade avoidance	16/25051	25/63668	0.0110074	0.0458455	0.0329801
GO:0015562	efflux transmembrane transporter activity	19/25051	31/63668	0.0110439	0.0458455	0.0329801
GO:0042547	cell wall modification involved in multidimensional cell growth	19/25051	31/63668	0.0110439	0.0458455	0.0329801
GO:0004470	malic enzyme activity	17/25051	27/63668	0.0111107	0.0458455	0.0329801
GO:0004471	malate dehydrogenase (decarboxylating) (NAD+) activity	17/25051	27/63668	0.0111107	0.0458455	0.0329801
GO:0010148	transpiration	17/25051	27/63668	0.0111107	0.0458455	0.0329801
GO:0015846	polyamine transport	17/25051	27/63668	0.0111107	0.0458455	0.0329801
GO:0016174	NAD(P)H oxidase H2O2-forming activity	17/25051	27/63668	0.0111107	0.0458455	0.0329801
GO:0006564	L-serine biosynthetic process	18/25051	29/63668	0.0111165	0.0458455	0.0329801
GO:0022898	regulation of transmembrane transporter activity	18/25051	29/63668	0.0111165	0.0458455	0.0329801
GO:0032412	regulation of ion transmembrane transporter activity	18/25051	29/63668	0.0111165	0.0458455	0.0329801
GO:0051574	positive regulation of histone H3-K9 methylation	18/25051	29/63668	0.0111165	0.0458455	0.0329801
GO:0009566	fertilization	68/25051	138/63668	0.0112156	0.0462122	0.0332439
GO:0048444	floral organ morphogenesis	92/25051	193/63668	0.0113382	0.0466745	0.0335765
GO:0042445	hormone metabolic process	170/25051	376/63668	0.011626	0.0478158	0.0343975
GO:0006346	DNA methylation-dependent heterochromatin assembly	29/25051	52/63668	0.0120015	0.0493153	0.0354763
